# Supplementary material for: Unraveling the Complex Dynamics of Porcine Respiratory Disease Complex (PRDC) Pathogens in the Spanish Swine Production
Source: Research Square preprint supplement (doi:10.21203/rs.3.rs-7179782/v1), 2025-09-03
Supplement: Supplementary file 1 [file 22752ad28a777809ce691a2a.xlsx]

## Sheet: Table_S2
Table S2. Significant pairwise differences in pathogen distributions (p < 0.05, Chi-squared test) with frequency percentages per evaluated variable.
Variable	Level 1	Level 2	Pathogen	Frequency (%) level 1	Frequency (%) level 2	P-value adjusted
Year	Global		Actinobacillus pleuropneumoniae			0.000140918
Year	2020	2023	Actinobacillus pleuropneumoniae	32.4487	27.0537	0.0144799
Year	2021	2023	Actinobacillus pleuropneumoniae	35.6745	27.0537	2.89539e-05
Year	2022	2023	Actinobacillus pleuropneumoniae	31.9489	27.0537	0.00666298
Year	2023	2024	Actinobacillus pleuropneumoniae	27.0537	33.6723	0.00181803
Year	Global		Actinobacillus suis			0.00139139
Year	2020	2021	Actinobacillus suis	5.91074	9.36455	0.0244361
Year	2021	2023	Actinobacillus suis	9.36455	5.26027	0.000358671
Year	2022	2023	Actinobacillus suis	8.1254	5.26027	0.0038335
Year	Global		Bordetella bronchiseptica			6.20679e-07
Year	2020	2021	Bordetella bronchiseptica	10.7229	16.0356	0.00542526
Year	2020	2022	Bordetella bronchiseptica	10.7229	19.4249	4.95218e-07
Year	2020	2024	Bordetella bronchiseptica	10.7229	16.9492	0.00113527
Year	2022	2023	Bordetella bronchiseptica	19.4249	13.6986	4.97964e-05
Year	Global		PCV2			1.83782e-39
Year	2020	2021	PCV2	37.8313	51.559	1.20691e-07
Year	2020	2023	PCV2	37.8313	29.7416	0.000231791
Year	2020	2024	PCV2	37.8313	24.5475	3.81394e-08
Year	2021	2022	PCV2	51.559	41.64	1.49413e-05
Year	2021	2023	PCV2	51.559	29.7416	1.10633e-26
Year	2021	2024	PCV2	51.559	24.5475	8.326e-30
Year	2022	2023	PCV2	41.64	29.7416	1.124e-11
Year	2022	2024	PCV2	41.64	24.5475	6.81379e-16
Year	2023	2024	PCV2	29.7416	24.5475	0.015496
Year	Global		Glaesserella parasuis			0.000450842
Year	2020	2021	Glaesserella parasuis	49.2754	57.6837	0.00219379
Year	2020	2022	Glaesserella parasuis	49.2754	59.2072	2.45656e-05
Year	2020	2023	Glaesserella parasuis	49.2754	57.5342	0.000426236
Year	2020	2024	Glaesserella parasuis	49.2754	57.4011	0.00339229
Year	2022	2024	IAV	14.231	10.8475	0.0468225
Year	Global		Mesomycoplasma hyopneumoniae			1.90623e-07
Year	2020	2022	Mesomycoplasma hyopneumoniae	26.3538	21.7114	0.0307744
Year	2020	2023	Mesomycoplasma hyopneumoniae	26.3538	19.5068	0.000424403
Year	2020	2024	Mesomycoplasma hyopneumoniae	26.3538	15.1412	1.20691e-07
Year	2021	2023	Mesomycoplasma hyopneumoniae	24.3333	19.5068	0.0125192
Year	2021	2024	Mesomycoplasma hyopneumoniae	24.3333	15.1412	9.4212e-06
Year	2022	2024	Mesomycoplasma hyopneumoniae	21.7114	15.1412	0.000450842
Year	2023	2024	Mesomycoplasma hyopneumoniae	19.5068	15.1412	0.0179965
Year	Global		Mesomycoplasma hyorhinis			0.00544824
Year	2020	2021	Mesomycoplasma hyorhinis	42.7711	48.5523	0.0439218
Year	2020	2022	Mesomycoplasma hyorhinis	42.7711	51.5016	0.000291738
Year	2022	2023	Mesomycoplasma hyorhinis	51.5016	47.3425	0.0420828
Year	Global		PRRSV-1			0.0448595
Year	2020	2022	PRRSV-1	47.8417	54.8593	0.00439931
Year	2020	2024	PRRSV-1	47.8417	54.0816	0.0286526
Year	Global		Streptococcus suis			2.30372e-11
Year	2020	2021	Streptococcus suis	55.4348	61.0245	0.049544
Year	2020	2022	Streptococcus suis	55.4348	62.7476	0.00233025
Year	2020	2024	Streptococcus suis	55.4348	48.9266	0.021624
Year	2021	2023	Streptococcus suis	61.0245	53.2055	0.000610065
Year	2021	2024	Streptococcus suis	61.0245	48.9266	2.48896e-06
Year	2022	2023	Streptococcus suis	62.7476	53.2055	2.17609e-07
Year	2022	2024	Streptococcus suis	62.7476	48.9266	4.76426e-10
Year	Global		PCV3			0.000490255
Year	2021	2022	PCV3	22.6371	18.3387	0.0328473
Year	2021	2023	PCV3	22.6371	15.5616	5.83301e-05
Year	2021	2024	PCV3	22.6371	16.0452	0.00238633
Category	Global		Bordetella bronchiseptica			0.00871335
Category	NA	Intensive white	Bordetella bronchiseptica	14.4661	17.1775	0.0153323
Category	Global		PCV2			0.00579651
Category	NA	Intensive white	PCV2	38.388	34.4532	0.00706131
Category	Global		Glaesserella parasuis			0.00411888
Category	NA	Intensive white	Glaesserella parasuis	55.4455	59.0374	0.0178165
Category	Intensive white	Intensive Iberian	Glaesserella parasuis	59.0374	48.5294	0.0122042
Category	Global		IAV			0.00107724
Category	NA	Intensive Iberian	IAV	12.9043	4.90196	0.0042809
Category	Intensive white	Intensive Iberian	IAV	14.5707	4.90196	0.000800987
Category	Global		Mesomycoplasma hyopneumoniae			2.94379e-06
Category	NA	Intensive white	Mesomycoplasma hyopneumoniae	23.1084	19.9501	0.0118288
Category	NA	Intensive Iberian	Mesomycoplasma hyopneumoniae	23.1084	8.33333	8.95578e-06
Category	Intensive white	Intensive Iberian	Mesomycoplasma hyopneumoniae	19.9501	8.33333	0.000347542
Category	Global		Mesomycoplasma hyorhinis			1.65969e-18
Category	NA	Intensive white	Mesomycoplasma hyorhinis	45.7523	52.5659	2.03812e-06
Category	NA	Intensive Iberian	Mesomycoplasma hyorhinis	45.7523	21.0784	1.51655e-10
Category	Intensive white	Intensive Iberian	Mesomycoplasma hyorhinis	52.5659	21.0784	1.85043e-16
Category	Global		PRRSV-1			2.74909e-19
Category	NA	Intensive white	PRRSV-1	49.1647	57.9793	3.38433e-10
Category	NA	Intensive Iberian	PRRSV-1	49.1647	28.9216	2.80157e-07
Category	Intensive white	Intensive Iberian	PRRSV-1	57.9793	28.9216	2.39324e-14
Category	Global		Pasteurella multocida			0.0460171
Category	NA	Intensive Iberian	Pasteurella multocida	33.413	25	0.0404832
Category	Intensive white	Intensive Iberian	Pasteurella multocida	34.5331	25	0.018782
Category	Global		Streptococcus suis			2.96235e-05
Category	NA	Intensive Iberian	Streptococcus suis	56.4698	40.1961	4.97964e-05
Category	Intensive white	Intensive Iberian	Streptococcus suis	57.9473	40.1961	7.38641e-06
Category	Global		PCV3			2.182e-06
Category	NA	Intensive Iberian	PCV3	18.5507	3.43137	5.98497e-07
Category	Intensive white	Intensive Iberian	PCV3	18.1558	3.43137	9.37971e-07
Age	Global		Actinobacillus pleuropneumoniae			9.49605e-20
Age	Post-weaning	Fattening	Actinobacillus pleuropneumoniae	24.64	36.1488	3.13886e-12
Age	Post-weaning	NA	Actinobacillus pleuropneumoniae	24.64	29.634	0.0324502
Age	Post-weaning	Suckling	Actinobacillus pleuropneumoniae	24.64	14.966	0.0306673
Age	Fattening	NA	Actinobacillus pleuropneumoniae	36.1488	29.634	0.00175723
Age	Fattening	Breeders	Actinobacillus pleuropneumoniae	36.1488	20.4301	2.12431e-08
Age	Fattening	Suckling	Actinobacillus pleuropneumoniae	36.1488	14.966	1.68479e-06
Age	NA	Breeders	Actinobacillus pleuropneumoniae	29.634	20.4301	0.00400511
Age	NA	Suckling	Actinobacillus pleuropneumoniae	29.634	14.966	0.00142703
Age	Global		Actinobacillus suis			0.00660682
Age	Fattening	NA	Actinobacillus suis	6.20751	8.84434	0.0207538
Age	Fattening	Breeders	Actinobacillus suis	6.20751	9.94624	0.0213796
Age	Global		Bordetella bronchiseptica			1.58794e-08
Age	Post-weaning	Breeders	Bordetella bronchiseptica	18.64	4.03226	1.51655e-10
Age	Fattening	Breeders	Bordetella bronchiseptica	15.8983	4.03226	1.55267e-08
Age	NA	Breeders	Bordetella bronchiseptica	15.3121	4.03226	2.97922e-07
Age	Breeders	Suckling	Bordetella bronchiseptica	4.03226	14.1892	0.000419684
Age	Global		PCV2			2.50865e-41
Age	Post-weaning	Fattening	PCV2	24.0577	43.6186	7.76427e-32
Age	Post-weaning	NA	PCV2	24.0577	33.412	2.16138e-05
Age	Post-weaning	Suckling	PCV2	24.0577	12.1622	0.00542632
Age	Fattening	NA	PCV2	43.6186	33.412	6.83312e-07
Age	Fattening	Breeders	PCV2	43.6186	29.7587	2.48896e-06
Age	Fattening	Suckling	PCV2	43.6186	12.1622	1.11652e-12
Age	NA	Suckling	PCV2	33.412	12.1622	2.42667e-06
Age	Breeders	Suckling	PCV2	29.7587	12.1622	0.000232499
Age	Global		Glaesserella parasuis			8.66802e-30
Age	Post-weaning	Fattening	Glaesserella parasuis	68.6699	54.6556	2.95764e-16
Age	Post-weaning	NA	Glaesserella parasuis	68.6699	56.9575	4.45705e-07
Age	Post-weaning	Breeders	Glaesserella parasuis	68.6699	35.1206	2.25019e-29
Age	Fattening	Breeders	Glaesserella parasuis	54.6556	35.1206	1.78536e-11
Age	NA	Breeders	Glaesserella parasuis	56.9575	35.1206	4.75042e-11
Age	Breeders	Suckling	Glaesserella parasuis	35.1206	60.8108	1.1387e-06
Age	Global		IAV			6.5673e-06
Age	Post-weaning	Fattening	IAV	17.4641	12.3781	5.64135e-05
Age	Post-weaning	NA	IAV	17.4641	11.9104	0.00245653
Age	Post-weaning	Breeders	IAV	17.4641	8.8	0.000333239
Age	Breeders	Suckling	IAV	8.8	18.9189	0.00648699
Age	Global		Mesomycoplasma hyopneumoniae			1.5343e-30
Age	Post-weaning	Fattening	Mesomycoplasma hyopneumoniae	10.5516	25.2364	1.42956e-25
Age	Post-weaning	NA	Mesomycoplasma hyopneumoniae	10.5516	19.9058	2.89878e-08
Age	Post-weaning	Breeders	Mesomycoplasma hyopneumoniae	10.5516	28.2667	7.55022e-16
Age	Fattening	NA	Mesomycoplasma hyopneumoniae	25.2364	19.9058	0.00484401
Age	Fattening	Suckling	Mesomycoplasma hyopneumoniae	25.2364	4.72973	1.96021e-07
Age	NA	Breeders	Mesomycoplasma hyopneumoniae	19.9058	28.2667	0.00543151
Age	NA	Suckling	Mesomycoplasma hyopneumoniae	19.9058	4.72973	7.465e-05
Age	Breeders	Suckling	Mesomycoplasma hyopneumoniae	28.2667	4.72973	7.50054e-08
Age	Global		Mesomycoplasma hyorhinis			4.60574e-48
Age	Post-weaning	Fattening	Mesomycoplasma hyorhinis	59.44	48.8771	2.45502e-09
Age	Post-weaning	NA	Mesomycoplasma hyorhinis	59.44	44.3396	1.8451e-10
Age	Post-weaning	Breeders	Mesomycoplasma hyorhinis	59.44	16.622	3.13259e-45
Age	Post-weaning	Suckling	Mesomycoplasma hyorhinis	59.44	29.7297	1.44378e-10
Age	Fattening	NA	Mesomycoplasma hyorhinis	48.8771	44.3396	0.0470597
Age	Fattening	Breeders	Mesomycoplasma hyorhinis	48.8771	16.622	1.97269e-30
Age	Fattening	Suckling	Mesomycoplasma hyorhinis	48.8771	29.7297	4.38931e-05
Age	NA	Breeders	Mesomycoplasma hyorhinis	44.3396	16.622	7.36917e-19
Age	NA	Suckling	Mesomycoplasma hyorhinis	44.3396	29.7297	0.00441983
Age	Breeders	Suckling	Mesomycoplasma hyorhinis	16.622	29.7297	0.00441983
Age	Global		PRRSV-1			2.69093e-54
Age	Post-weaning	Fattening	PRRSV-1	52.0384	58.7452	0.000255907
Age	Post-weaning	Breeders	PRRSV-1	52.0384	18.984	1.4128e-27
Age	Post-weaning	Suckling	PRRSV-1	52.0384	27.027	1.28987e-07
Age	Fattening	NA	PRRSV-1	58.7452	47.6415	6.74671e-08
Age	Fattening	Breeders	PRRSV-1	58.7452	18.984	4.15812e-46
Age	Fattening	Suckling	PRRSV-1	58.7452	27.027	7.38011e-13
Age	NA	Breeders	PRRSV-1	47.6415	18.984	1.5676e-19
Age	NA	Suckling	PRRSV-1	47.6415	27.027	2.97134e-05
Age	Fattening	Breeders	Pasteurella multocida	33.156	39.6783	0.0337646
Age	Breeders	Suckling	Pasteurella multocida	39.6783	25	0.00724817
Age	Global		Streptococcus suis			5.26399e-10
Age	Post-weaning	Fattening	Streptococcus suis	62.1297	57.0626	0.00691955
Age	Post-weaning	NA	Streptococcus suis	62.1297	53.3648	0.000379196
Age	Post-weaning	Breeders	Streptococcus suis	62.1297	41.555	4.0526e-11
Age	Fattening	Breeders	Streptococcus suis	57.0626	41.555	1.30104e-07
Age	NA	Breeders	Streptococcus suis	53.3648	41.555	0.000825867
Age	Breeders	Suckling	Streptococcus suis	41.555	53.3784	0.0448595
Age	Global		PCV3			1.18252e-07
Age	NA	Breeders	PCV3	18.6375	31.0897	6.35816e-05
Age	Fattening	Breeders	PCV3	17.0498	31.0897	1.65097e-08
Age	Breeders	Post-weaning	PCV3	31.0897	16.2791	8.05497e-08
Age	Breeders	Suckling	PCV3	31.0897	13.6691	0.000684563
Region	Global		Actinobacillus pleuropneumoniae			0.000137848
Region	Comunidad Valenciana	Aragón	Actinobacillus pleuropneumoniae	38.4615	30.4598	0.00958682
Region	Comunidad Valenciana	Extremadura	Actinobacillus pleuropneumoniae	38.4615	28.9086	0.0278152
Region	Comunidad Valenciana	Andalucía	Actinobacillus pleuropneumoniae	38.4615	23.8532	0.0019294
Region	Comunidad Valenciana	Cataluña	Actinobacillus pleuropneumoniae	38.4615	25.625	0.000581157
Region	Aragón	Región de Murcia	Actinobacillus pleuropneumoniae	30.4598	39.6552	0.0127806
Region	Castilla-La Mancha	Andalucía	Actinobacillus pleuropneumoniae	35.1449	23.8532	0.023268
Region	Castilla-La Mancha	Cataluña	Actinobacillus pleuropneumoniae	35.1449	25.625	0.0192761
Region	Extremadura	Región de Murcia	Actinobacillus pleuropneumoniae	28.9086	39.6552	0.0252056
Region	Andalucía	Región de Murcia	Actinobacillus pleuropneumoniae	23.8532	39.6552	0.0019294
Region	Andalucía	Galicia	Actinobacillus pleuropneumoniae	23.8532	35.2941	0.0159857
Region	Cataluña	Región de Murcia	Actinobacillus pleuropneumoniae	25.625	39.6552	0.000835548
Region	Cataluña	Castilla y León	Actinobacillus pleuropneumoniae	25.625	32.4528	0.048454
Region	Cataluña	Galicia	Actinobacillus pleuropneumoniae	25.625	35.2941	0.0108123
Region	Global		Actinobacillus suis			0.00114139
Region	Comunidad Valenciana	Castilla-La Mancha	Actinobacillus suis	7.7381	2.89855	0.0377572
Region	Aragón	Castilla-La Mancha	Actinobacillus suis	7.12233	2.89855	0.0277204
Region	Castilla-La Mancha	Andalucía	Actinobacillus suis	2.89855	11.4679	0.00130213
Region	Castilla-La Mancha	Castilla y León	Actinobacillus suis	2.89855	9.98117	0.00205301
Region	Andalucía	Cataluña	Actinobacillus suis	11.4679	5.01044	0.0101617
Region	Andalucía	Galicia	Actinobacillus suis	11.4679	4.11765	0.00547048
Region	Cataluña	Castilla y León	Actinobacillus suis	5.01044	9.98117	0.0125192
Region	Castilla y León	Galicia	Actinobacillus suis	9.98117	4.11765	0.00762223
Region	Global		Bordetella bronchiseptica			1.24709e-07
Region	Comunidad Valenciana	Castilla-La Mancha	Bordetella bronchiseptica	20.4142	10.1818	0.00317782
Region	Comunidad Valenciana	Extremadura	Bordetella bronchiseptica	20.4142	10.3245	0.00166694
Region	Comunidad Valenciana	Región de Murcia	Bordetella bronchiseptica	20.4142	6.92641	8.86634e-05
Region	Comunidad Valenciana	Galicia	Bordetella bronchiseptica	20.4142	9.11765	0.00027707
Region	Aragón	Castilla-La Mancha	Bordetella bronchiseptica	16.8848	10.1818	0.014578
Region	Aragón	Extremadura	Bordetella bronchiseptica	16.8848	10.3245	0.00768576
Region	Aragón	Región de Murcia	Bordetella bronchiseptica	16.8848	6.92641	0.000504033
Region	Aragón	Galicia	Bordetella bronchiseptica	16.8848	9.11765	0.00124462
Region	Castilla-La Mancha	Andalucía	Bordetella bronchiseptica	10.1818	18.8073	0.0235905
Region	Castilla-La Mancha	Castilla y León	Bordetella bronchiseptica	10.1818	18.2674	0.0109417
Region	Extremadura	Andalucía	Bordetella bronchiseptica	10.3245	18.8073	0.0178264
Region	Extremadura	Castilla y León	Bordetella bronchiseptica	10.3245	18.2674	0.00660682
Region	Andalucía	Región de Murcia	Bordetella bronchiseptica	18.8073	6.92641	0.00118494
Region	Andalucía	Galicia	Bordetella bronchiseptica	18.8073	9.11765	0.00481674
Region	Cataluña	Región de Murcia	Bordetella bronchiseptica	14.405	6.92641	0.0163872
Region	Región de Murcia	Castilla y León	Bordetella bronchiseptica	6.92641	18.2674	0.000400988
Region	Castilla y León	Galicia	Bordetella bronchiseptica	18.2674	9.11765	0.00124462
Region	Global		PCV2			0.000490498
Region	Comunidad Valenciana	Castilla-La Mancha	PCV2	38.4615	27.1739	0.0122203
Region	Aragón	Castilla-La Mancha	PCV2	38.9191	27.1739	0.000687184
Region	Aragón	Región de Murcia	PCV2	38.9191	29.4372	0.0148141
Region	Aragón	Castilla y León	PCV2	38.9191	32.3864	0.0139909
Region	Aragón	Galicia	PCV2	38.9191	31.9527	0.0358109
Region	Global		Glaesserella parasuis			3.04247e-09
Region	Comunidad Valenciana	Aragón	Glaesserella parasuis	51.4793	59.4379	0.0158812
Region	Comunidad Valenciana	Castilla y León	Glaesserella parasuis	51.4793	64.9057	0.000523902
Region	Aragón	Extremadura	Glaesserella parasuis	59.4379	47.1976	0.000100767
Region	Aragón	Cataluña	Glaesserella parasuis	59.4379	52.4008	0.0122983
Region	Aragón	Castilla y León	Glaesserella parasuis	59.4379	64.9057	0.0468021
Region	Aragón	Galicia	Glaesserella parasuis	59.4379	46.7647	5.10629e-05
Region	Castilla-La Mancha	Castilla y León	Glaesserella parasuis	52.8986	64.9057	0.00437038
Region	Extremadura	Región de Murcia	Glaesserella parasuis	47.1976	60	0.0106547
Region	Extremadura	Castilla y León	Glaesserella parasuis	47.1976	64.9057	2.48896e-06
Region	Andalucía	Castilla y León	Glaesserella parasuis	53.211	64.9057	0.0109417
Region	Cataluña	Castilla y León	Glaesserella parasuis	52.4008	64.9057	0.000358671
Region	Región de Murcia	Galicia	Glaesserella parasuis	60	46.7647	0.00803386
Region	Castilla y León	Galicia	Glaesserella parasuis	64.9057	46.7647	1.36332e-06
Region	Global		IAV			2.5184e-10
Region	Comunidad Valenciana	Aragón	IAV	10.6509	15.6519	0.0443014
Region	Comunidad Valenciana	Extremadura	IAV	10.6509	4.42478	0.0104094
Region	Comunidad Valenciana	Castilla y León	IAV	10.6509	17.1053	0.0291166
Region	Aragón	Castilla-La Mancha	IAV	15.6519	9.78261	0.0300151
Region	Aragón	Extremadura	IAV	15.6519	4.42478	3.39647e-07
Region	Aragón	Andalucía	IAV	15.6519	7.79817	0.00773098
Region	Aragón	Cataluña	IAV	15.6519	10	0.00528943
Region	Aragón	Galicia	IAV	15.6519	8.52941	0.00244323
Region	Castilla-La Mancha	Extremadura	IAV	9.78261	4.42478	0.0345804
Region	Castilla-La Mancha	Castilla y León	IAV	9.78261	17.1053	0.0192839
Region	Extremadura	Cataluña	IAV	4.42478	10	0.0138762
Region	Extremadura	Región de Murcia	IAV	4.42478	12.5541	0.00249179
Region	Extremadura	Castilla y León	IAV	4.42478	17.1053	3.57929e-07
Region	Andalucía	Castilla y León	IAV	7.79817	17.1053	0.00508549
Region	Cataluña	Castilla y León	IAV	10	17.1053	0.00500728
Region	Castilla y León	Galicia	IAV	17.1053	8.52941	0.00195533
Region	Global		Mesomycoplasma hyopneumoniae			6.10251e-15
Region	Comunidad Valenciana	Aragón	Mesomycoplasma hyopneumoniae	18.0473	24.2424	0.0330065
Region	Comunidad Valenciana	Extremadura	Mesomycoplasma hyopneumoniae	18.0473	10.0295	0.0113097
Region	Comunidad Valenciana	Región de Murcia	Mesomycoplasma hyopneumoniae	18.0473	30.303	0.00351203
Region	Comunidad Valenciana	Castilla y León	Mesomycoplasma hyopneumoniae	18.0473	11.4662	0.0228393
Region	Aragón	Castilla-La Mancha	Mesomycoplasma hyopneumoniae	24.2424	17.7536	0.0443014
Region	Aragón	Extremadura	Mesomycoplasma hyopneumoniae	24.2424	10.0295	4.78224e-08
Region	Aragón	Andalucía	Mesomycoplasma hyopneumoniae	24.2424	16.9725	0.0443014
Region	Aragón	Castilla y León	Mesomycoplasma hyopneumoniae	24.2424	11.4662	1.09964e-09
Region	Castilla-La Mancha	Extremadura	Mesomycoplasma hyopneumoniae	17.7536	10.0295	0.020387
Region	Castilla-La Mancha	Región de Murcia	Mesomycoplasma hyopneumoniae	17.7536	30.303	0.00464901
Region	Castilla-La Mancha	Castilla y León	Mesomycoplasma hyopneumoniae	17.7536	11.4662	0.0438286
Region	Extremadura	Cataluña	Mesomycoplasma hyopneumoniae	10.0295	20.6681	0.000360207
Region	Extremadura	Región de Murcia	Mesomycoplasma hyopneumoniae	10.0295	30.303	1.61475e-08
Region	Extremadura	Galicia	Mesomycoplasma hyopneumoniae	10.0295	21.7647	0.000239727
Region	Andalucía	Región de Murcia	Mesomycoplasma hyopneumoniae	16.9725	30.303	0.00481674
Region	Cataluña	Región de Murcia	Mesomycoplasma hyopneumoniae	20.6681	30.303	0.0173852
Region	Cataluña	Castilla y León	Mesomycoplasma hyopneumoniae	20.6681	11.4662	0.000429634
Region	Región de Murcia	Castilla y León	Mesomycoplasma hyopneumoniae	30.303	11.4662	5.08809e-09
Region	Castilla y León	Galicia	Mesomycoplasma hyopneumoniae	11.4662	21.7647	0.000316101
Region	Global		Mesomycoplasma hyorhinis			1.27412e-30
Region	Comunidad Valenciana	Castilla-La Mancha	Mesomycoplasma hyorhinis	51.1834	38.7681	0.00862713
Region	Comunidad Valenciana	Extremadura	Mesomycoplasma hyorhinis	51.1834	19.174	1.47503e-16
Region	Comunidad Valenciana	Andalucía	Mesomycoplasma hyorhinis	51.1834	37.6147	0.00739924
Region	Aragón	Castilla-La Mancha	Mesomycoplasma hyorhinis	53.1609	38.7681	3.58104e-05
Region	Aragón	Extremadura	Mesomycoplasma hyorhinis	53.1609	19.174	1.7137e-30
Region	Aragón	Andalucía	Mesomycoplasma hyorhinis	53.1609	37.6147	6.81583e-05
Region	Aragón	Castilla y León	Mesomycoplasma hyorhinis	53.1609	46.1394	0.00971378
Region	Aragón	Galicia	Mesomycoplasma hyorhinis	53.1609	44.1176	0.00617745
Region	Castilla-La Mancha	Extremadura	Mesomycoplasma hyorhinis	38.7681	19.174	9.21354e-07
Region	Castilla-La Mancha	Cataluña	Mesomycoplasma hyorhinis	38.7681	48.643	0.0277204
Region	Extremadura	Andalucía	Mesomycoplasma hyorhinis	19.174	37.6147	1.46799e-05
Region	Extremadura	Cataluña	Mesomycoplasma hyorhinis	19.174	48.643	2.95764e-16
Region	Extremadura	Región de Murcia	Mesomycoplasma hyorhinis	19.174	47.1861	3.02879e-11
Region	Extremadura	Castilla y León	Mesomycoplasma hyorhinis	19.174	46.1394	1.95624e-14
Region	Extremadura	Galicia	Mesomycoplasma hyorhinis	19.174	44.1176	7.32702e-11
Region	Andalucía	Cataluña	Mesomycoplasma hyorhinis	37.6147	48.643	0.0225356
Region	Global		PRRSV-1			2.42356e-78
Region	Comunidad Valenciana	Aragón	PRRSV-1	47.4627	61.961	2.3642e-06
Region	Comunidad Valenciana	Extremadura	PRRSV-1	47.4627	24.7788	1.55267e-08
Region	Comunidad Valenciana	Andalucía	PRRSV-1	47.4627	33.4862	0.00532386
Region	Comunidad Valenciana	Cataluña	PRRSV-1	47.4627	59.0814	0.00481674
Region	Comunidad Valenciana	Región de Murcia	PRRSV-1	47.4627	60.6061	0.00860431
Region	Comunidad Valenciana	Castilla y León	PRRSV-1	47.4627	30.4511	4.3064e-06
Region	Comunidad Valenciana	Galicia	PRRSV-1	47.4627	37.9412	0.0377572
Region	Aragón	Castilla-La Mancha	PRRSV-1	61.961	50.3623	0.000870498
Region	Aragón	Extremadura	PRRSV-1	61.961	24.7788	1.86996e-37
Region	Aragón	Andalucía	PRRSV-1	61.961	33.4862	3.97403e-15
Region	Aragón	Castilla y León	PRRSV-1	61.961	30.4511	9.60976e-40
Region	Aragón	Galicia	PRRSV-1	61.961	37.9412	3.89616e-16
Region	Castilla-La Mancha	Extremadura	PRRSV-1	50.3623	24.7788	1.09964e-09
Region	Castilla-La Mancha	Andalucía	PRRSV-1	50.3623	33.4862	0.0010579
Region	Castilla-La Mancha	Castilla y León	PRRSV-1	50.3623	30.4511	3.57929e-07
Region	Castilla-La Mancha	Galicia	PRRSV-1	50.3623	37.9412	0.00818179
Region	Extremadura	Cataluña	PRRSV-1	24.7788	59.0814	1.74401e-20
Region	Extremadura	Región de Murcia	PRRSV-1	24.7788	60.6061	3.93804e-16
Region	Extremadura	Galicia	PRRSV-1	24.7788	37.9412	0.00127348
Region	Andalucía	Cataluña	PRRSV-1	33.4862	59.0814	6.88569e-09
Region	Andalucía	Región de Murcia	PRRSV-1	33.4862	60.6061	1.34963e-07
Region	Cataluña	Castilla y León	PRRSV-1	59.0814	30.4511	2.6265e-18
Region	Cataluña	Galicia	PRRSV-1	59.0814	37.9412	3.81394e-08
Region	Región de Murcia	Castilla y León	PRRSV-1	60.6061	30.4511	1.75403e-13
Region	Región de Murcia	Galicia	PRRSV-1	60.6061	37.9412	1.21e-06
Region	Global		Pasteurella multocida			0.00971378
Region	Aragón	Extremadura	Pasteurella multocida	35.7599	26.5487	0.00339229
Region	Aragón	Cataluña	Pasteurella multocida	35.7599	30.0626	0.0418588
Region	Global		Streptococcus suis			1.15254e-19
Region	Comunidad Valenciana	Aragón	Streptococcus suis	52.3669	61.59	0.00435099
Region	Comunidad Valenciana	Extremadura	Streptococcus suis	52.3669	38.3481	0.00139139
Region	Comunidad Valenciana	Galicia	Streptococcus suis	52.3669	42.6471	0.034684
Region	Aragón	Castilla-La Mancha	Streptococcus suis	61.59	51.8116	0.00595079
Region	Aragón	Extremadura	Streptococcus suis	61.59	38.3481	4.34549e-15
Region	Aragón	Andalucía	Streptococcus suis	61.59	50.9174	0.00735192
Region	Aragón	Cataluña	Streptococcus suis	61.59	53.6534	0.00411239
Region	Aragón	Castilla y León	Streptococcus suis	61.59	55.6604	0.0286487
Region	Aragón	Galicia	Streptococcus suis	61.59	42.6471	2.58057e-10
Region	Castilla-La Mancha	Extremadura	Streptococcus suis	51.8116	38.3481	0.00411239
Region	Extremadura	Andalucía	Streptococcus suis	38.3481	50.9174	0.0131318
Region	Extremadura	Cataluña	Streptococcus suis	38.3481	53.6534	0.000117144
Region	Extremadura	Región de Murcia	Streptococcus suis	38.3481	59.1304	1.06154e-05
Region	Extremadura	Castilla y León	Streptococcus suis	38.3481	55.6604	6.07979e-06
Region	Cataluña	Galicia	Streptococcus suis	53.6534	42.6471	0.00768576
Region	Región de Murcia	Galicia	Streptococcus suis	59.1304	42.6471	0.000720983
Region	Castilla y León	Galicia	Streptococcus suis	55.6604	42.6471	0.00104178
Region	Global		PCV3			3.80114e-11
Region	Extremadura	Castilla y León	PCV3	7.23684	19.6787	1.683e-05
Region	Extremadura	Aragón	PCV3	7.23684	21.3138	7.99089e-08
Region	Extremadura	Cataluña	PCV3	7.23684	12.8035	0.0475662
Region	Extremadura	Andalucía	PCV3	7.23684	17.8947	0.0019294
Region	Extremadura	Comunidad Valenciana	PCV3	7.23684	16.5605	0.00223534
Region	Extremadura	Región de Murcia	PCV3	7.23684	14.8649	0.0198563
Region	Castilla y León	Galicia	PCV3	19.6787	11.8694	0.0115194
Region	Castilla y León	Cataluña	PCV3	19.6787	12.8035	0.0155808
Region	Castilla y León	Castilla-La Mancha	PCV3	19.6787	11.7188	0.021204
Region	Aragón	Galicia	PCV3	21.3138	11.8694	0.000319485
Region	Aragón	Cataluña	PCV3	21.3138	12.8035	0.000194712
Region	Aragón	Castilla-La Mancha	PCV3	21.3138	11.7188	0.00152326
Season	Global		Actinobacillus pleuropneumoniae			1.66562e-21
Season	Winter	Summer	Actinobacillus pleuropneumoniae	37.5847	22.0814	3.50522e-16
Season	Winter	Fall	Actinobacillus pleuropneumoniae	37.5847	25.9731	1.51655e-10
Season	Spring	Summer	Actinobacillus pleuropneumoniae	35.4648	22.0814	4.69376e-13
Season	Spring	Fall	Actinobacillus pleuropneumoniae	35.4648	25.9731	7.99089e-08
Season	Global		Bordetella bronchiseptica			0.00888694
Season	Spring	Summer	Bordetella bronchiseptica	18.0354	13.8211	0.0098251
Season	Spring	Fall	Bordetella bronchiseptica	18.0354	13.942	0.00648699
Season	Global		PCV2			6.63383e-05
Season	Winter	Summer	PCV2	32.7778	39.0244	0.003501
Season	Winter	Fall	PCV2	32.7778	40.7249	4.15055e-05
Season	Spring	Fall	PCV2	34.93	40.7249	0.00306977
Season	Global		Glaesserella parasuis			0.00124462
Season	Winter	Summer	Glaesserella parasuis	60.0617	52.2132	0.000291738
Season	Winter	Fall	Glaesserella parasuis	60.0617	55.2799	0.0229377
Season	Spring	Summer	Glaesserella parasuis	57.9484	52.2132	0.00830467
Season	Global		IAV			0.042394
Season	Spring	Summer	IAV	11.8435	15.7942	0.00818179
Season	Global		Mesomycoplasma hyopneumoniae			1.58296e-06
Season	Winter	Fall	Mesomycoplasma hyopneumoniae	18.3611	26.204	1.82361e-06
Season	Spring	Fall	Mesomycoplasma hyopneumoniae	19.1957	26.204	1.36584e-05
Season	Summer	Fall	Mesomycoplasma hyopneumoniae	21.8609	26.204	0.0332675
Season	Global		PRRSV-1			0.00622539
Season	Winter	Summer	PRRSV-1	53.2099	47.6061	0.0131318
Season	Spring	Summer	PRRSV-1	54.8092	47.6061	0.000763478
Season	Summer	Fall	PRRSV-1	47.6061	52.5496	0.0377572
Season	Global		Streptococcus suis			0.00134034
Season	Winter	Spring	Streptococcus suis	53.1481	59.2056	0.00151343
Season	Winter	Summer	Streptococcus suis	53.1481	59.4033	0.00500009
Season	Spring	Fall	Streptococcus suis	59.2056	54.6742	0.0270971
Season	Summer	Fall	Streptococcus suis	59.4033	54.6742	0.0461543
Season	Global		PCV3			0.0171829
Season	Fall	Summer	PCV3	16.5125	21.2581	0.0131318
Season	Winter	Summer	PCV3	16.1873	21.2581	0.00660682
Sample type	Global		Actinobacillus suis			2.69093e-54
Sample type	Lung tissue	Lower respiratory tract scraping	Actinobacillus suis	5.85866	38.7097	2.69093e-54
Sample type	Lung swab	Lower respiratory tract scraping	Actinobacillus suis	6.90909	38.7097	1.70099e-14
Sample type	Global		Bordetella bronchiseptica			2.11305e-06
Sample type	Lung tissue	Lung swab	Bordetella bronchiseptica	14.8372	21.0909	0.0171222
Sample type	Lung tissue	Lower respiratory tract scraping	Bordetella bronchiseptica	14.8372	29.0323	1.36584e-05
Sample type	Global		Glaesserella parasuis			5.5088e-25
Sample type	Lung tissue	Lung swab	Glaesserella parasuis	54.9881	63.2727	0.0223094
Sample type	Lung tissue	Lower respiratory tract scraping	Glaesserella parasuis	54.9881	98.0645	1.52565e-24
Sample type	Lung swab	Lower respiratory tract scraping	Glaesserella parasuis	63.2727	98.0645	2.9231e-14
Sample type	Global		IAV			0.00941708
Sample type	Lung tissue	Lower respiratory tract scraping	IAV	12.9068	21.9355	0.00542561
Sample type	Global		Mesomycoplasma hyopneumoniae			9.92102e-11
Sample type	Lung tissue	Lower respiratory tract scraping	Mesomycoplasma hyopneumoniae	20.4973	44.2308	2.65928e-11
Sample type	Lung swab	Lower respiratory tract scraping	Mesomycoplasma hyopneumoniae	20.3636	44.2308	2.02127e-06
Sample type	Global		Mesomycoplasma hyorhinis			1.65097e-08
Sample type	Lung tissue	Lower respiratory tract scraping	Mesomycoplasma hyorhinis	47.0179	72.9032	3.83072e-09
Sample type	Lung swab	Lower respiratory tract scraping	Mesomycoplasma hyorhinis	48.3636	72.9032	8.59089e-06
Sample type	Global		PRRSV-1			5.52209e-07
Sample type	Lung tissue	Lung swab	PRRSV-1	53.5492	42.1245	0.00121979
Sample type	Lung tissue	Lower respiratory tract scraping	PRRSV-1	53.5492	35.0649	4.97964e-05
Sample type	Global		Pasteurella multocida			1.36564e-09
Sample type	Lung tissue	Lower respiratory tract scraping	Pasteurella multocida	32.7173	58.7097	3.08977e-10
Sample type	Lung swab	Lower respiratory tract scraping	Pasteurella multocida	33.8182	58.7097	6.12764e-06
Sample type	Global		Streptococcus suis			1.30289e-23
Sample type	Lung tissue	Lung swab	Streptococcus suis	54.7767	62.5455	0.0340712
Sample type	Lung tissue	Lower respiratory tract scraping	Streptococcus suis	54.7767	96.7742	2.49974e-23
Sample type	Lung swab	Lower respiratory tract scraping	Streptococcus suis	62.5455	96.7742	1.76108e-13
Sample type	Global		PCV3			0.000194712
Sample type	Lung tissue	Lower respiratory tract scraping	PCV3	18.6478	7.14286	0.00875486
Sample type	Lung tissue	Lung swab	PCV3	18.6478	10.4247	0.00411239
