# Supplementary material for: Unraveling the Complex Dynamics of Porcine Respiratory Disease Complex (PRDC) Pathogens in the Spanish Swine Production
Source: Research Square preprint supplement (doi:10.21203/rs.3.rs-7179782/v1), 2025-09-03
Supplement: Supplementary file 2 [file 6797456c51b907c52f342612.xlsx]

## Sheet: Table_S4
Table S4. Significant cooccurrences (p < 0.05) among the 13 PRDC-associated pathogens.
Pathogen 1	Pathogen 2	Φ coefficient	Φ categorization	P-value adjusted
Actinobacillus pleuropneumoniae	Actinobacillus suis	0.0623109	Weak	3.37689e-06
Actinobacillus pleuropneumoniae	PCV2	0.0361112	Weak	0.00778862
Actinobacillus pleuropneumoniae	Glaesserella parasuis	0.116114	Moderate	8.70532e-19
Actinobacillus pleuropneumoniae	IAV	-0.0576453	Weak	1.83582e-05
Actinobacillus pleuropneumoniae	PRRSV-1	0.0656491	Weak	9.19483e-07
Actinobacillus pleuropneumoniae	PRRSV-2	0.0516841	Weak	0.00013206
Actinobacillus pleuropneumoniae	Pasteurella multocida	0.138442	Moderate	3.47692e-26
Actinobacillus pleuropneumoniae	Streptococcus suis	0.104686	Moderate	1.64686e-15
Actinobacillus suis	Bordetella bronchiseptica	0.0443291	Weak	0.00111251
Actinobacillus suis	Glaesserella parasuis	0.0966341	Weak	2.14087e-13
Actinobacillus suis	IAV	0.0386572	Weak	0.00450095
Actinobacillus suis	Mesomycoplasma hyorhinis	0.036647	Weak	0.00712123
Actinobacillus suis	Pasteurella multocida	0.126914	Moderate	3.31717e-22
Actinobacillus suis	Streptococcus suis	0.116591	Moderate	6.55305e-19
Bordetella bronchiseptica	Glaesserella parasuis	0.183586	Strong	3.99856e-45
Bordetella bronchiseptica	IAV	0.0336407	Weak	0.0136018
Bordetella bronchiseptica	Mesomycoplasma hyorhinis	0.231376	Strong	4.87849e-71
Bordetella bronchiseptica	PRRSV-1	0.0860917	Weak	6.74435e-11
Bordetella bronchiseptica	Pasteurella multocida	0.0893929	Weak	1.18066e-11
Bordetella bronchiseptica	Streptococcus suis	0.147075	Moderate	2.46452e-29
Bordetella bronchiseptica	PCV3	0.0439422	Weak	0.0011846
PCV2	Mesomycoplasma hyopneumoniae	0.106806	Moderate	4.3931e-16
PCV2	Mesomycoplasma hyorhinis	0.0394521	Weak	0.00383305
PCV2	PRRSV-1	0.0956651	Weak	3.63558e-13
PCV2	Pasteurella multocida	0.0456156	Weak	0.000805215
PCV2	PCV3	0.0372158	Weak	0.00632417
Glaesserella parasuis	IAV	0.139399	Moderate	1.66311e-26
Glaesserella parasuis	Mesomycoplasma hyopneumoniae	0.047607	Weak	0.000455197
Glaesserella parasuis	Mesomycoplasma hyorhinis	0.415527	Very strong	4.88092e-226
Glaesserella parasuis	PRRSV-1	0.166367	Strong	2.99054e-37
Glaesserella parasuis	Pasteurella multocida	0.276504	Very strong	9.24999e-101
Glaesserella parasuis	Streptococcus suis	0.365619	Very strong	2.39964e-175
Glaesserella parasuis	PCV3	0.0362018	Weak	0.00777296
IAV	Mesomycoplasma hyopneumoniae	0.0599046	Weak	8.21901e-06
IAV	Mesomycoplasma hyorhinis	0.141808	Moderate	2.29484e-27
IAV	Pasteurella multocida	0.0487857	Weak	0.000324985
IAV	Streptococcus suis	0.0773652	Weak	5.26906e-09
IAV	PCV3	0.0565439	Weak	2.64778e-05
Mesomycoplasma hyopneumoniae	Mesomycoplasma hyorhinis	0.0969066	Weak	1.90109e-13
Mesomycoplasma hyopneumoniae	Pasteurella multocida	0.201971	Strong	2.21221e-54
Mesomycoplasma hyopneumoniae	Streptococcus suis	0.115434	Moderate	1.33507e-18
Mesomycoplasma hyopneumoniae	PCV3	0.0393493	Weak	0.00385075
Mesomycoplasma hyorhinis	PRRSV-1	0.259676	Very strong	4.04118e-89
Mesomycoplasma hyorhinis	Pasteurella multocida	0.238475	Strong	2.37345e-75
Mesomycoplasma hyorhinis	Streptococcus suis	0.271732	Very strong	1.97193e-97
Mesomycoplasma hyorhinis	PCV3	0.0442291	Weak	0.00111754
PRRSV-1	PRRSV-2	-0.042203	Weak	0.00188204
PRRSV-1	Pasteurella multocida	0.0931553	Weak	1.49231e-12
PRRSV-1	Streptococcus suis	0.131284	Moderate	1.14453e-23
Pasteurella multocida	Streptococcus suis	0.281055	Very strong	5.87056e-104
Pasteurella multocida	PCV3	0.04454	Weak	0.00107331
Streptococcus suis	PCV3	0.0559493	Weak	3.17602e-05
