# Supplementary material for: Unraveling the Complex Dynamics of Porcine Respiratory Disease Complex (PRDC) Pathogens in the Spanish Swine Production
Source: Research Square preprint supplement (doi:10.21203/rs.3.rs-7179782/v1), 2025-09-03
Supplement: Supplementary file 3 [file 6a091550bba6dc24c76d70a4.xlsx]

## Sheet: Table_S1
Table S1. Summary of the frequencies of the 13 PRDC pathogens across the evaluated variables.
Spanish Autonomous Region	Aragón	3141	52.2021
	Castilla y León	532	8.84162
	Cataluña	481	7.99402
	Galicia	340	5.65066
	Extremadura	339	5.63404
	Comunidad Valenciana	338	5.61742
	Castilla-La Mancha	276	4.587
	Región de Murcia	233	3.87236
	Andalucía	218	3.62307
	Navarra	56	0.930696
	Comunidad de Madrid	33	0.548446
	Islas Baleares	9	0.149576
	La Rioja	9	0.149576
	Islas Canarias	6	0.0997175
	País Vasco	5	0.0830979
	Asturias	1	0.0166196
Year	2023	1828	30.3806
	2022	1568	26.0595
	2021	902	14.9909
	2024	885	14.7083
	2020	834	13.8607
Season	Spring	1868	31.0454
	Winter	1626	27.0234
	Fall	1415	23.5167
	Summer	1108	18.4145
Production category	NA	2941	48.8782
	Intensive white	2810	46.701
	Intensive Iberian	204	3.39039
	Extensive Iberian	62	1.03041
Animal age	Fattening	3388	56.3071
	Post-weaning	1254	20.841
	NA	851	14.1433
	Breeders	376	6.24896
	Suckling	148	2.4597
Sample type	Lung tissue	5475	90.9922
	Lung swab	279	4.63686
	Lower respiratory tract scraping	156	2.59265
	Lung tissue + swab	50	0.830979
	Bronchoalveolar lavage fluid	38	0.631544
	Lung + tongue tissue	8	0.132957
	Lung + tracheal tissue	4	0.0664783
	Lung + tracheal + tonsil tissue	4	0.0664783
	Lung swab + Lower respiratory tract scraping	2	0.0332392
	Lung + tonsil tissue	1	0.0166196
