# Supplementary material for: Unraveling the Complex Dynamics of Porcine Respiratory Disease Complex (PRDC) Pathogens in the Spanish Swine Production
Source: Research Square preprint supplement (doi:10.21203/rs.3.rs-7179782/v1), 2025-09-03
Supplement: Supplementary file 4 [file 84067978c041a5eff14ae8e6.xlsx]

## Sheet: Table_S3
Table S3. List and frequency of combinations of the evaluated PRDC-related pathogens in 6,017 clinical cases.
Pathogen combination	Frequency (n)	Percentage
PRRSV-1	134	2.23
PCV2	109	1.81
Streptococcus suis	102	1.7
Actinobacillus pleuropneumoniae	89	1.48
PCV2, PRRSV-1	76	1.26
Glaesserella parasuis, Mesomycoplasma hyorhinis, Pasteurella multocida, PRRSV-1, Streptococcus suis	75	1.25
PRRSV-1, Streptococcus suis	66	1.1
Glaesserella parasuis, Mesomycoplasma hyorhinis, PRRSV-1, Streptococcus suis	63	1.05
Actinobacillus pleuropneumoniae, Glaesserella parasuis, Mesomycoplasma hyorhinis, Pasteurella multocida, PRRSV-1, Streptococcus suis	57	0.95
PCV2, Glaesserella parasuis, Mesomycoplasma hyorhinis, PRRSV-1, Streptococcus suis	54	0.9
PCV3	54	0.9
Glaesserella parasuis, Mesomycoplasma hyorhinis, Streptococcus suis	52	0.86
Glaesserella parasuis, Streptococcus suis	52	0.86
Actinobacillus pleuropneumoniae, PRRSV-1	50	0.83
Mesomycoplasma hyorhinis, PRRSV-1	50	0.83
Glaesserella parasuis	47	0.78
Glaesserella parasuis, PRRSV-1, Streptococcus suis	46	0.76
Glaesserella parasuis, PRRSV-1	45	0.75
PCV2, Glaesserella parasuis, Mesomycoplasma hyorhinis, Pasteurella multocida, PRRSV-1, Streptococcus suis	39	0.65
Glaesserella parasuis, Mesomycoplasma hyorhinis, PRRSV-1	38	0.63
Actinobacillus pleuropneumoniae, PCV2	35	0.58
Glaesserella parasuis, Mesomycoplasma hyorhinis, Pasteurella multocida, Streptococcus suis	33	0.55
Actinobacillus pleuropneumoniae, PCV2, PRRSV-1	32	0.53
PCV2, Glaesserella parasuis, Mesomycoplasma hyorhinis, PRRSV-1	32	0.53
Glaesserella parasuis, Mesomycoplasma hyorhinis	32	0.53
Actinobacillus pleuropneumoniae, PCV2, Glaesserella parasuis, Mesomycoplasma hyorhinis, PRRSV-1, Streptococcus suis	30	0.5
PCV2, PCV3	30	0.5
PCV2, Streptococcus suis	30	0.5
Glaesserella parasuis, Mesomycoplasma hyopneumoniae, Mesomycoplasma hyorhinis, Pasteurella multocida, PRRSV-1, Streptococcus suis	30	0.5
Actinobacillus pleuropneumoniae, PCV2, Glaesserella parasuis, Mesomycoplasma hyorhinis, Pasteurella multocida, PRRSV-1, Streptococcus suis	29	0.48
Actinobacillus pleuropneumoniae, Glaesserella parasuis, Mesomycoplasma hyorhinis, PRRSV-1, Streptococcus suis	29	0.48
PCV2, PRRSV-1, Streptococcus suis	29	0.48
Actinobacillus pleuropneumoniae, Streptococcus suis	27	0.45
Bordetella bronchiseptica, Glaesserella parasuis, Mesomycoplasma hyorhinis, Pasteurella multocida, PRRSV-1, Streptococcus suis	27	0.45
Bordetella bronchiseptica, Glaesserella parasuis, Mesomycoplasma hyorhinis, Streptococcus suis	27	0.45
Actinobacillus pleuropneumoniae, Glaesserella parasuis	26	0.43
Actinobacillus pleuropneumoniae, Glaesserella parasuis, PRRSV-1	26	0.43
Actinobacillus pleuropneumoniae, Glaesserella parasuis, PRRSV-1, Streptococcus suis	25	0.42
PCV2, Glaesserella parasuis, PRRSV-1, Streptococcus suis	25	0.42
Mesomycoplasma hyopneumoniae	24	0.4
Actinobacillus pleuropneumoniae, Glaesserella parasuis, Mesomycoplasma hyorhinis, Streptococcus suis	23	0.38
Actinobacillus pleuropneumoniae, Glaesserella parasuis, Streptococcus suis	23	0.38
PCV2, Glaesserella parasuis, Mesomycoplasma hyopneumoniae, Mesomycoplasma hyorhinis, Pasteurella multocida, PRRSV-1, Streptococcus suis	23	0.38
PCV2, Glaesserella parasuis, PRRSV-1	23	0.38
PCV2, Mesomycoplasma hyorhinis, PRRSV-1	23	0.38
Mesomycoplasma hyorhinis, PRRSV-1, Streptococcus suis	23	0.38
Actinobacillus pleuropneumoniae, Glaesserella parasuis, Mesomycoplasma hyorhinis, PRRSV-1	22	0.37
Bordetella bronchiseptica, Glaesserella parasuis, Mesomycoplasma hyorhinis, PRRSV-1, Streptococcus suis	22	0.37
Glaesserella parasuis, IAV, Mesomycoplasma hyorhinis, Pasteurella multocida, PRRSV-1, Streptococcus suis	21	0.35
Glaesserella parasuis, Mesomycoplasma hyopneumoniae, Mesomycoplasma hyorhinis, PRRSV-1, Streptococcus suis	21	0.35
IAV	21	0.35
PCV2, Glaesserella parasuis	20	0.33
Glaesserella parasuis, IAV, Mesomycoplasma hyorhinis	20	0.33
Mesomycoplasma hyorhinis	20	0.33
Pasteurella multocida	20	0.33
Actinobacillus pleuropneumoniae, Bordetella bronchiseptica, Glaesserella parasuis, Mesomycoplasma hyorhinis, PRRSV-1, Streptococcus suis	19	0.32
PCV3, PRRSV-1	19	0.32
Actinobacillus pleuropneumoniae, Glaesserella parasuis, Mesomycoplasma hyopneumoniae, Mesomycoplasma hyorhinis, Pasteurella multocida, PRRSV-1, Streptococcus suis	18	0.3
Glaesserella parasuis, IAV, Mesomycoplasma hyorhinis, Streptococcus suis	18	0.3
Glaesserella parasuis, Pasteurella multocida, PRRSV-1, Streptococcus suis	18	0.3
Glaesserella parasuis, Pasteurella multocida, Streptococcus suis	18	0.3
Actinobacillus pleuropneumoniae, PCV2, Glaesserella parasuis, PRRSV-1, Streptococcus suis	17	0.28
Bordetella bronchiseptica, PCV2, Glaesserella parasuis, Mesomycoplasma hyorhinis, Pasteurella multocida, PRRSV-1, Streptococcus suis	17	0.28
PCV2, Mesomycoplasma hyopneumoniae	17	0.28
PCV2, Mesomycoplasma hyorhinis, PRRSV-1, Streptococcus suis	17	0.28
PCV3, Streptococcus suis	17	0.28
Glaesserella parasuis, IAV, Mesomycoplasma hyorhinis, PRRSV-1, Streptococcus suis	17	0.28
Pasteurella multocida, Streptococcus suis	17	0.28
Actinobacillus pleuropneumoniae, Glaesserella parasuis, Mesomycoplasma hyorhinis, Pasteurella multocida, Streptococcus suis	16	0.27
Actinobacillus pleuropneumoniae, Glaesserella parasuis, Pasteurella multocida, PRRSV-1, Streptococcus suis	16	0.27
Actinobacillus pleuropneumoniae, Glaesserella parasuis, Pasteurella multocida, Streptococcus suis	16	0.27
Bordetella bronchiseptica, PCV2, Glaesserella parasuis, Mesomycoplasma hyorhinis, PRRSV-1, Streptococcus suis	16	0.27
Glaesserella parasuis, Mesomycoplasma hyorhinis, Pasteurella multocida, PRRSV-1	16	0.27
Actinobacillus pleuropneumoniae, Bordetella bronchiseptica, PCV2, Glaesserella parasuis, Mesomycoplasma hyorhinis, Pasteurella multocida, PRRSV-1, Streptococcus suis	15	0.25
Actinobacillus pleuropneumoniae, PCV2, Glaesserella parasuis, Streptococcus suis	15	0.25
Actinobacillus pleuropneumoniae, Bordetella bronchiseptica, Glaesserella parasuis, Mesomycoplasma hyorhinis, Pasteurella multocida, PRRSV-1, Streptococcus suis	14	0.23
Actinobacillus pleuropneumoniae, PCV2, PRRSV-1, Streptococcus suis	14	0.23
Actinobacillus pleuropneumoniae, PCV2, Streptococcus suis	14	0.23
Actinobacillus pleuropneumoniae, Glaesserella parasuis, Pasteurella multocida	14	0.23
Bordetella bronchiseptica, Glaesserella parasuis, Mesomycoplasma hyorhinis, Pasteurella multocida, Streptococcus suis	14	0.23
Bordetella bronchiseptica, Glaesserella parasuis, Streptococcus suis	14	0.23
PCV2, Glaesserella parasuis, Mesomycoplasma hyorhinis	14	0.23
PCV2, Glaesserella parasuis, Mesomycoplasma hyorhinis, Pasteurella multocida, Streptococcus suis	14	0.23
PCV2, Glaesserella parasuis, Streptococcus suis	14	0.23
PCV3, Glaesserella parasuis, Mesomycoplasma hyorhinis, PRRSV-1, Streptococcus suis	14	0.23
PCV3, Glaesserella parasuis, Mesomycoplasma hyorhinis, Streptococcus suis	14	0.23
Glaesserella parasuis, IAV, Mesomycoplasma hyorhinis, Pasteurella multocida, Streptococcus suis	14	0.23
Glaesserella parasuis, Mesomycoplasma hyopneumoniae, Mesomycoplasma hyorhinis, Pasteurella multocida, Streptococcus suis	14	0.23
Actinobacillus pleuropneumoniae, PCV2, Glaesserella parasuis, Mesomycoplasma hyopneumoniae, Mesomycoplasma hyorhinis, Pasteurella multocida, PRRSV-1, Streptococcus suis	13	0.22
Actinobacillus pleuropneumoniae, PCV2, Glaesserella parasuis, Pasteurella multocida, PRRSV-1, Streptococcus suis	13	0.22
Actinobacillus pleuropneumoniae, Mesomycoplasma hyorhinis	13	0.22
Bordetella bronchiseptica	13	0.22
Bordetella bronchiseptica, PCV3, Glaesserella parasuis, Mesomycoplasma hyorhinis, PRRSV-1, Streptococcus suis	13	0.22
PCV2, Glaesserella parasuis, Mesomycoplasma hyorhinis, Streptococcus suis	13	0.22
PCV2, Mesomycoplasma hyopneumoniae, PRRSV-1	13	0.22
PCV3, Glaesserella parasuis, Mesomycoplasma hyorhinis, Pasteurella multocida, PRRSV-1, Streptococcus suis	13	0.22
Glaesserella parasuis, IAV	13	0.22
Glaesserella parasuis, Mesomycoplasma hyorhinis, Pasteurella multocida	13	0.22
Actinobacillus pleuropneumoniae, PCV2, Glaesserella parasuis, Mesomycoplasma hyorhinis, PRRSV-1	12	0.2
Actinobacillus pleuropneumoniae, Mesomycoplasma hyorhinis, PRRSV-1	12	0.2
Actinobacillus suis, Actinobacillus pleuropneumoniae, Glaesserella parasuis, Pasteurella multocida, Streptococcus suis	12	0.2
Bordetella bronchiseptica, Glaesserella parasuis, Mesomycoplasma hyorhinis	12	0.2
PCV2, Glaesserella parasuis, Mesomycoplasma hyopneumoniae, Mesomycoplasma hyorhinis, PRRSV-1, Streptococcus suis	12	0.2
Glaesserella parasuis, IAV, Mesomycoplasma hyopneumoniae, Mesomycoplasma hyorhinis, PRRSV-1, Streptococcus suis	12	0.2
Glaesserella parasuis, Mesomycoplasma hyopneumoniae, Mesomycoplasma hyorhinis, Pasteurella multocida, PRRSV-1	12	0.2
Actinobacillus pleuropneumoniae, Glaesserella parasuis, Mesomycoplasma hyopneumoniae, Pasteurella multocida, PRRSV-1, Streptococcus suis	11	0.18
Actinobacillus pleuropneumoniae, Mesomycoplasma hyorhinis, PRRSV-1, Streptococcus suis	11	0.18
Actinobacillus pleuropneumoniae, PRRSV-1, Streptococcus suis	11	0.18
Actinobacillus suis, Glaesserella parasuis, Mesomycoplasma hyorhinis, Pasteurella multocida, Streptococcus suis	11	0.18
PCV2, Pasteurella multocida	11	0.18
PCV3, Glaesserella parasuis, PRRSV-1, Streptococcus suis	11	0.18
Glaesserella parasuis, IAV, Mesomycoplasma hyorhinis, PRRSV-1	11	0.18
Mesomycoplasma hyorhinis, Pasteurella multocida, PRRSV-1, Streptococcus suis	11	0.18
Mesomycoplasma hyorhinis, Streptococcus suis	11	0.18
Pasteurella multocida, PRRSV-1, Streptococcus suis	11	0.18
Actinobacillus pleuropneumoniae, PCV2, Glaesserella parasuis, Mesomycoplasma hyopneumoniae, Mesomycoplasma hyorhinis, Pasteurella multocida, Streptococcus suis	10	0.17
Actinobacillus pleuropneumoniae, Pasteurella multocida, PRRSV-1, Streptococcus suis	10	0.17
Actinobacillus pleuropneumoniae, Pasteurella multocida, Streptococcus suis	10	0.17
Bordetella bronchiseptica, Glaesserella parasuis, IAV, Mesomycoplasma hyorhinis, Pasteurella multocida, PRRSV-1, Streptococcus suis	10	0.17
PCV2, PCV3, Glaesserella parasuis, Mesomycoplasma hyorhinis, PRRSV-1, Streptococcus suis	10	0.17
PCV2, Glaesserella parasuis, Mesomycoplasma hyopneumoniae, Mesomycoplasma hyorhinis, Streptococcus suis	10	0.17
PCV2, Glaesserella parasuis, Mesomycoplasma hyorhinis, Pasteurella multocida, PRRSV-1	10	0.17
PCV2, Mesomycoplasma hyopneumoniae, Mesomycoplasma hyorhinis, PRRSV-1, Streptococcus suis	10	0.17
PCV2, Mesomycoplasma hyopneumoniae, Pasteurella multocida, Streptococcus suis	10	0.17
PCV3, Glaesserella parasuis	10	0.17
Glaesserella parasuis, IAV, Streptococcus suis	10	0.17
Glaesserella parasuis, Pasteurella multocida	10	0.17
IAV, PRRSV-1	10	0.17
Mesomycoplasma hyopneumoniae, Pasteurella multocida	10	0.17
Mesomycoplasma hyopneumoniae, Streptococcus suis	10	0.17
Actinobacillus pleuropneumoniae, Bordetella bronchiseptica, Glaesserella parasuis, Mesomycoplasma hyorhinis, Pasteurella multocida, Streptococcus suis	9	0.15
Actinobacillus pleuropneumoniae, PCV2, PCV3, Glaesserella parasuis, Mesomycoplasma hyorhinis, Pasteurella multocida, PRRSV-1, Streptococcus suis	9	0.15
Actinobacillus pleuropneumoniae, PCV2, Glaesserella parasuis	9	0.15
Actinobacillus pleuropneumoniae, PCV2, Glaesserella parasuis, Mesomycoplasma hyorhinis, Pasteurella multocida, Streptococcus suis	9	0.15
Actinobacillus pleuropneumoniae, Glaesserella parasuis, Mesomycoplasma hyopneumoniae, Mesomycoplasma hyorhinis, PRRSV-1, Streptococcus suis	9	0.15
Actinobacillus pleuropneumoniae, Glaesserella parasuis, Mesomycoplasma hyopneumoniae, Pasteurella multocida, Streptococcus suis	9	0.15
Actinobacillus pleuropneumoniae, Glaesserella parasuis, Mesomycoplasma hyorhinis, Pasteurella multocida, PRRSV-1	9	0.15
Actinobacillus suis	9	0.15
Bordetella bronchiseptica, PCV2, Glaesserella parasuis, Mesomycoplasma hyopneumoniae, Mesomycoplasma hyorhinis, Pasteurella multocida, PRRSV-1, Streptococcus suis	9	0.15
Bordetella bronchiseptica, Glaesserella parasuis, Mesomycoplasma hyorhinis, PRRSV-1	9	0.15
Bordetella bronchiseptica, Mesomycoplasma hyorhinis, PRRSV-1	9	0.15
PCV2, Glaesserella parasuis, Mesomycoplasma hyopneumoniae, Mesomycoplasma hyorhinis, Pasteurella multocida, Streptococcus suis	9	0.15
PCV2, Mesomycoplasma hyorhinis, Pasteurella multocida, PRRSV-1	9	0.15
Mesomycoplasma hyopneumoniae, Mesomycoplasma hyorhinis, PRRSV-1	9	0.15
Mesomycoplasma hyopneumoniae, Pasteurella multocida, Streptococcus suis	9	0.15
Actinobacillus pleuropneumoniae, Bordetella bronchiseptica, PCV2, Glaesserella parasuis, Mesomycoplasma hyorhinis, PRRSV-1, Streptococcus suis	8	0.13
Actinobacillus pleuropneumoniae, Bordetella bronchiseptica, PCV2, Glaesserella parasuis, Mesomycoplasma hyorhinis, Pasteurella multocida, Streptococcus suis	8	0.13
Actinobacillus pleuropneumoniae, Bordetella bronchiseptica, PCV3, Glaesserella parasuis, Mesomycoplasma hyorhinis, Pasteurella multocida, PRRSV-1, Streptococcus suis	8	0.13
Actinobacillus pleuropneumoniae, Bordetella bronchiseptica, Glaesserella parasuis, Mesomycoplasma hyopneumoniae, Mesomycoplasma hyorhinis, Pasteurella multocida, PRRSV-1, Streptococcus suis	8	0.13
Actinobacillus pleuropneumoniae, PCV2, PCV3, Glaesserella parasuis, Mesomycoplasma hyorhinis, PRRSV-1, Streptococcus suis	8	0.13
Actinobacillus pleuropneumoniae, PCV2, Glaesserella parasuis, Mesomycoplasma hyopneumoniae, Pasteurella multocida, Streptococcus suis	8	0.13
Actinobacillus pleuropneumoniae, Glaesserella parasuis, IAV, Mesomycoplasma hyorhinis, Pasteurella multocida, PRRSV-1, Streptococcus suis	8	0.13
Actinobacillus pleuropneumoniae, Glaesserella parasuis, Mesomycoplasma hyopneumoniae, Mesomycoplasma hyorhinis, Pasteurella multocida, Streptococcus suis	8	0.13
Actinobacillus pleuropneumoniae, Glaesserella parasuis, Pasteurella multocida, PRRSV-1	8	0.13
Actinobacillus pleuropneumoniae, Mesomycoplasma hyopneumoniae, Pasteurella multocida, Streptococcus suis	8	0.13
Bordetella bronchiseptica, Mesomycoplasma hyorhinis	8	0.13
Bordetella bronchiseptica, PRRSV-1	8	0.13
Bordetella bronchiseptica, Streptococcus suis	8	0.13
PCV2, PCV3, Mesomycoplasma hyorhinis, PRRSV-1	8	0.13
PCV2, PCV3, PRRSV-1	8	0.13
PCV2, IAV	8	0.13
PCV2, Mesomycoplasma hyopneumoniae, PRRSV-1, Streptococcus suis	8	0.13
PCV2, Mesomycoplasma hyopneumoniae, Pasteurella multocida	8	0.13
PCV2, Mesomycoplasma hyorhinis	8	0.13
PCV3, Glaesserella parasuis, Mesomycoplasma hyorhinis, Pasteurella multocida, Streptococcus suis	8	0.13
PCV3, Glaesserella parasuis, Streptococcus suis	8	0.13
Glaesserella parasuis, Mesomycoplasma hyopneumoniae, Mesomycoplasma hyorhinis, Pasteurella multocida	8	0.13
Glaesserella parasuis, Mesomycoplasma hyopneumoniae, Streptococcus suis	8	0.13
Mesomycoplasma hyopneumoniae, PRRSV-1	8	0.13
Pasteurella multocida, PRRSV-1	8	0.13
Actinobacillus pleuropneumoniae, PCV2, Glaesserella parasuis, Mesomycoplasma hyopneumoniae, Pasteurella multocida, PRRSV-1, Streptococcus suis	7	0.12
Actinobacillus pleuropneumoniae, PCV2, Glaesserella parasuis, Mesomycoplasma hyorhinis, Streptococcus suis	7	0.12
Actinobacillus pleuropneumoniae, PCV2, Pasteurella multocida	7	0.12
Actinobacillus pleuropneumoniae, PCV3, Glaesserella parasuis, Mesomycoplasma hyorhinis, PRRSV-1, Streptococcus suis	7	0.12
Actinobacillus pleuropneumoniae, Glaesserella parasuis, Mesomycoplasma hyorhinis	7	0.12
Actinobacillus suis, PCV2	7	0.12
Bordetella bronchiseptica, PCV2, PCV3, Glaesserella parasuis, Mesomycoplasma hyorhinis, Pasteurella multocida, PRRSV-1, Streptococcus suis	7	0.12
Bordetella bronchiseptica, Glaesserella parasuis	7	0.12
Bordetella bronchiseptica, Glaesserella parasuis, Mesomycoplasma hyopneumoniae, Mesomycoplasma hyorhinis, PRRSV-1, Streptococcus suis	7	0.12
Bordetella bronchiseptica, Glaesserella parasuis, PRRSV-1, Streptococcus suis	7	0.12
Bordetella bronchiseptica, Mesomycoplasma hyorhinis, PRRSV-1, Streptococcus suis	7	0.12
PCV2, Glaesserella parasuis, IAV, Mesomycoplasma hyopneumoniae, Mesomycoplasma hyorhinis, Pasteurella multocida, Streptococcus suis	7	0.12
PCV2, Glaesserella parasuis, Pasteurella multocida, PRRSV-1	7	0.12
PCV2, Mesomycoplasma hyopneumoniae, Mesomycoplasma hyorhinis, PRRSV-1	7	0.12
PCV2, Pasteurella multocida, PRRSV-1	7	0.12
PCV2, Pasteurella multocida, Streptococcus suis	7	0.12
PCV3, Glaesserella parasuis, IAV, Mesomycoplasma hyorhinis, PRRSV-1, Streptococcus suis	7	0.12
PCV3, Mesomycoplasma hyopneumoniae	7	0.12
Glaesserella parasuis, Mesomycoplasma hyopneumoniae, Mesomycoplasma hyorhinis, Streptococcus suis	7	0.12
Glaesserella parasuis, Mesomycoplasma hyopneumoniae, Pasteurella multocida, Streptococcus suis	7	0.12
Mesomycoplasma hyopneumoniae, Mesomycoplasma hyorhinis, PRRSV-1, Streptococcus suis	7	0.12
Actinobacillus pleuropneumoniae, Bordetella bronchiseptica, PCV2, PCV3, Glaesserella parasuis, Mesomycoplasma hyorhinis, Pasteurella multocida, PRRSV-1, Streptococcus suis	6	0.1
Actinobacillus pleuropneumoniae, Bordetella bronchiseptica, PCV2, Glaesserella parasuis, Mesomycoplasma hyopneumoniae, Mesomycoplasma hyorhinis, Pasteurella multocida, PRRSV-1, Streptococcus suis	6	0.1
Actinobacillus pleuropneumoniae, Bordetella bronchiseptica, Glaesserella parasuis, Mesomycoplasma hyorhinis, PRRSV-1	6	0.1
Actinobacillus pleuropneumoniae, Bordetella bronchiseptica, Glaesserella parasuis, Mesomycoplasma hyorhinis, Streptococcus suis	6	0.1
Actinobacillus pleuropneumoniae, PCV2, Glaesserella parasuis, IAV, Mesomycoplasma hyorhinis, Pasteurella multocida, PRRSV-1, Streptococcus suis	6	0.1
Actinobacillus pleuropneumoniae, PCV2, Glaesserella parasuis, Mesomycoplasma hyopneumoniae, Streptococcus suis	6	0.1
Actinobacillus pleuropneumoniae, PCV2, Glaesserella parasuis, Mesomycoplasma hyorhinis, Pasteurella multocida, PRRSV-1	6	0.1
Actinobacillus pleuropneumoniae, PCV2, Glaesserella parasuis, PRRSV-1	6	0.1
Actinobacillus pleuropneumoniae, PCV2, Glaesserella parasuis, Pasteurella multocida, Streptococcus suis	6	0.1
Actinobacillus pleuropneumoniae, PCV2, Mesomycoplasma hyopneumoniae, Mesomycoplasma hyorhinis, Pasteurella multocida, PRRSV-1, Streptococcus suis	6	0.1
Actinobacillus pleuropneumoniae, PCV2, Mesomycoplasma hyopneumoniae, PRRSV-1	6	0.1
Actinobacillus pleuropneumoniae, PCV2, Mesomycoplasma hyopneumoniae, Streptococcus suis	6	0.1
Actinobacillus pleuropneumoniae, PCV2, Mesomycoplasma hyorhinis, PRRSV-1	6	0.1
Actinobacillus pleuropneumoniae, PCV3	6	0.1
Actinobacillus pleuropneumoniae, PCV3, Glaesserella parasuis, Mesomycoplasma hyorhinis, Pasteurella multocida, PRRSV-1, Streptococcus suis	6	0.1
Actinobacillus pleuropneumoniae, Glaesserella parasuis, IAV, Mesomycoplasma hyorhinis, Streptococcus suis	6	0.1
Actinobacillus pleuropneumoniae, Glaesserella parasuis, Mesomycoplasma hyopneumoniae, Mesomycoplasma hyorhinis, PRRSV-1	6	0.1
Actinobacillus pleuropneumoniae, Glaesserella parasuis, Mesomycoplasma hyopneumoniae, Mesomycoplasma hyorhinis, Streptococcus suis	6	0.1
Actinobacillus pleuropneumoniae, Mesomycoplasma hyopneumoniae, PRRSV-1	6	0.1
Actinobacillus pleuropneumoniae, Mesomycoplasma hyopneumoniae, Streptococcus suis	6	0.1
Actinobacillus pleuropneumoniae, Mesomycoplasma hyorhinis, Pasteurella multocida, PRRSV-1, Streptococcus suis	6	0.1
Actinobacillus pleuropneumoniae, Mesomycoplasma hyorhinis, Streptococcus suis	6	0.1
Actinobacillus suis, Actinobacillus pleuropneumoniae, PCV2, Glaesserella parasuis, Mesomycoplasma hyorhinis, Pasteurella multocida, PRRSV-1, Streptococcus suis	6	0.1
Actinobacillus suis, Actinobacillus pleuropneumoniae, PCV3, Glaesserella parasuis, Mesomycoplasma hyorhinis, Pasteurella multocida, PRRSV-1, Streptococcus suis	6	0.1
Actinobacillus suis, Actinobacillus pleuropneumoniae, Glaesserella parasuis, Mesomycoplasma hyorhinis, Pasteurella multocida, Streptococcus suis	6	0.1
Actinobacillus suis, Bordetella bronchiseptica, Glaesserella parasuis, Mesomycoplasma hyorhinis, Pasteurella multocida, Streptococcus suis	6	0.1
Actinobacillus suis, Glaesserella parasuis, Mesomycoplasma hyopneumoniae, Mesomycoplasma hyorhinis, Pasteurella multocida, Streptococcus suis	6	0.1
Bordetella bronchiseptica, PCV2	6	0.1
Bordetella bronchiseptica, PCV2, Glaesserella parasuis, Mesomycoplasma hyorhinis, Streptococcus suis	6	0.1
Bordetella bronchiseptica, PCV3, Glaesserella parasuis, Mesomycoplasma hyorhinis, Pasteurella multocida, PRRSV-1, Streptococcus suis	6	0.1
Bordetella bronchiseptica, Glaesserella parasuis, PRRSV-1	6	0.1
PCV2, PCV3, Glaesserella parasuis, Mesomycoplasma hyopneumoniae, Mesomycoplasma hyorhinis, Pasteurella multocida, PRRSV-1, Streptococcus suis	6	0.1
PCV2, PCV3, Mesomycoplasma hyopneumoniae	6	0.1
PCV2, Glaesserella parasuis, IAV, Mesomycoplasma hyorhinis, PRRSV-1, Streptococcus suis	6	0.1
PCV2, Glaesserella parasuis, IAV, Mesomycoplasma hyorhinis, Pasteurella multocida, PRRSV-1, Streptococcus suis	6	0.1
PCV2, Glaesserella parasuis, Mesomycoplasma hyopneumoniae, Mesomycoplasma hyorhinis, PRRSV-1	6	0.1
PCV2, Glaesserella parasuis, Pasteurella multocida, PRRSV-1, Streptococcus suis	6	0.1
PCV2, IAV, Mesomycoplasma hyopneumoniae	6	0.1
PCV2, Mesomycoplasma hyopneumoniae, Mesomycoplasma hyorhinis, Pasteurella multocida, PRRSV-1	6	0.1
PCV2, Mesomycoplasma hyopneumoniae, Streptococcus suis	6	0.1
PCV2, Mesomycoplasma hyorhinis, Pasteurella multocida, PRRSV-1, Streptococcus suis	6	0.1
PCV3, PRRSV-1, Streptococcus suis	6	0.1
PCV3, Pasteurella multocida, Streptococcus suis	6	0.1
Glaesserella parasuis, IAV, Mesomycoplasma hyopneumoniae, Mesomycoplasma hyorhinis, Pasteurella multocida, PRRSV-1, Streptococcus suis	6	0.1
Glaesserella parasuis, Mesomycoplasma hyopneumoniae, PRRSV-1, Streptococcus suis	6	0.1
Mesomycoplasma hyorhinis, Pasteurella multocida, PRRSV-1	6	0.1
Actinobacillus pleuropneumoniae, Bordetella bronchiseptica, PCV2, Glaesserella parasuis, Mesomycoplasma hyorhinis, PRRSV-1	5	0.08
Actinobacillus pleuropneumoniae, Bordetella bronchiseptica, Glaesserella parasuis, Streptococcus suis	5	0.08
Actinobacillus pleuropneumoniae, PCV2, Glaesserella parasuis, Pasteurella multocida	5	0.08
Actinobacillus pleuropneumoniae, PCV2, Mesomycoplasma hyopneumoniae, Pasteurella multocida, Streptococcus suis	5	0.08
Actinobacillus pleuropneumoniae, PCV2, Mesomycoplasma hyorhinis, PRRSV-1, Streptococcus suis	5	0.08
Actinobacillus pleuropneumoniae, PCV2, Pasteurella multocida, PRRSV-1, Streptococcus suis	5	0.08
Actinobacillus pleuropneumoniae, PCV3, Glaesserella parasuis, IAV, Mesomycoplasma hyorhinis, PRRSV-1, Streptococcus suis	5	0.08
Actinobacillus pleuropneumoniae, Glaesserella parasuis, IAV, Mesomycoplasma hyorhinis, PRRSV-1, Streptococcus suis	5	0.08
Actinobacillus pleuropneumoniae, Glaesserella parasuis, IAV, Mesomycoplasma hyorhinis, Pasteurella multocida, Streptococcus suis	5	0.08
Actinobacillus pleuropneumoniae, Glaesserella parasuis, Mesomycoplasma hyopneumoniae	5	0.08
Actinobacillus pleuropneumoniae, Mesomycoplasma hyopneumoniae	5	0.08
Actinobacillus pleuropneumoniae, Mesomycoplasma hyopneumoniae, Pasteurella multocida	5	0.08
Actinobacillus pleuropneumoniae, Pasteurella multocida	5	0.08
Actinobacillus suis, Actinobacillus pleuropneumoniae, PCV2, Glaesserella parasuis, Mesomycoplasma hyopneumoniae, Mesomycoplasma hyorhinis, Pasteurella multocida, PRRSV-1, Streptococcus suis	5	0.08
Actinobacillus suis, Actinobacillus pleuropneumoniae, Glaesserella parasuis, Mesomycoplasma hyorhinis, PRRSV-1, Streptococcus suis	5	0.08
Actinobacillus suis, Actinobacillus pleuropneumoniae, Glaesserella parasuis, Mesomycoplasma hyorhinis, Pasteurella multocida, PRRSV-1, Streptococcus suis	5	0.08
Actinobacillus suis, PCV2, Glaesserella parasuis, Mesomycoplasma hyopneumoniae, Streptococcus suis	5	0.08
Actinobacillus suis, PCV2, Glaesserella parasuis, Mesomycoplasma hyorhinis, Pasteurella multocida, PRRSV-1, Streptococcus suis	5	0.08
Actinobacillus suis, Glaesserella parasuis, Mesomycoplasma hyopneumoniae, Mesomycoplasma hyorhinis, Pasteurella multocida, PRRSV-1, Streptococcus suis	5	0.08
Actinobacillus suis, Streptococcus suis	5	0.08
Bordetella bronchiseptica, PCV2, Glaesserella parasuis, Mesomycoplasma hyorhinis	5	0.08
Bordetella bronchiseptica, PCV2, Glaesserella parasuis, Mesomycoplasma hyorhinis, PRRSV-1	5	0.08
Bordetella bronchiseptica, PCV2, Glaesserella parasuis, Mesomycoplasma hyorhinis, Pasteurella multocida, Streptococcus suis	5	0.08
Bordetella bronchiseptica, PCV2, Mesomycoplasma hyorhinis, PRRSV-1	5	0.08
Bordetella bronchiseptica, PCV3, Glaesserella parasuis, IAV, Mesomycoplasma hyorhinis, Pasteurella multocida, PRRSV-1, Streptococcus suis	5	0.08
Bordetella bronchiseptica, Glaesserella parasuis, IAV, Mesomycoplasma hyorhinis, Streptococcus suis	5	0.08
Bordetella bronchiseptica, Glaesserella parasuis, Mesomycoplasma hyorhinis, Pasteurella multocida, PRRSV-1	5	0.08
Bordetella bronchiseptica, PRRSV-1, Streptococcus suis	5	0.08
PCV2, PCV3, Glaesserella parasuis	5	0.08
PCV2, PCV3, Glaesserella parasuis, PRRSV-1, Streptococcus suis	5	0.08
PCV2, PCV3, Streptococcus suis	5	0.08
PCV2, Glaesserella parasuis, IAV, Mesomycoplasma hyopneumoniae, Mesomycoplasma hyorhinis, Pasteurella multocida, PRRSV-1, Streptococcus suis	5	0.08
PCV2, Glaesserella parasuis, IAV, Streptococcus suis	5	0.08
PCV2, Glaesserella parasuis, Mesomycoplasma hyopneumoniae, Mesomycoplasma hyorhinis, Pasteurella multocida	5	0.08
PCV2, Glaesserella parasuis, Mesomycoplasma hyopneumoniae, Mesomycoplasma hyorhinis, Pasteurella multocida, PRRSV-1	5	0.08
PCV2, Glaesserella parasuis, Mesomycoplasma hyopneumoniae, PRRSV-1, Streptococcus suis	5	0.08
PCV2, Glaesserella parasuis, Mesomycoplasma hyopneumoniae, Pasteurella multocida, PRRSV-1, Streptococcus suis	5	0.08
PCV2, Glaesserella parasuis, Mesomycoplasma hyopneumoniae, Pasteurella multocida, Streptococcus suis	5	0.08
PCV2, Glaesserella parasuis, Pasteurella multocida	5	0.08
PCV2, Glaesserella parasuis, Pasteurella multocida, Streptococcus suis	5	0.08
PCV2, IAV, Mesomycoplasma hyorhinis, PRRSV-1	5	0.08
PCV2, Mesomycoplasma hyopneumoniae, Pasteurella multocida, PRRSV-1	5	0.08
PCV3, Mesomycoplasma hyorhinis, PRRSV-1	5	0.08
PCV3, Pasteurella multocida	5	0.08
Glaesserella parasuis, IAV, PRRSV-1, Streptococcus suis	5	0.08
Glaesserella parasuis, Mesomycoplasma hyopneumoniae, Mesomycoplasma hyorhinis, PRRSV-1	5	0.08
Glaesserella parasuis, Mesomycoplasma hyopneumoniae, Pasteurella multocida, PRRSV-1, Streptococcus suis	5	0.08
Glaesserella parasuis, Pasteurella multocida, PRRSV-1	5	0.08
IAV, Mesomycoplasma hyopneumoniae	5	0.08
Mesomycoplasma hyopneumoniae, Mesomycoplasma hyorhinis, Streptococcus suis	5	0.08
Actinobacillus pleuropneumoniae, Bordetella bronchiseptica, PCV2, Glaesserella parasuis, Mesomycoplasma hyorhinis, Pasteurella multocida, PRRSV-1	4	0.07
Actinobacillus pleuropneumoniae, Bordetella bronchiseptica, PCV2, Glaesserella parasuis, Mesomycoplasma hyorhinis, Streptococcus suis	4	0.07
Actinobacillus pleuropneumoniae, Bordetella bronchiseptica, PCV2, Glaesserella parasuis, PRRSV-1, Streptococcus suis	4	0.07
Actinobacillus pleuropneumoniae, Bordetella bronchiseptica, Glaesserella parasuis, Mesomycoplasma hyopneumoniae, Mesomycoplasma hyorhinis, Pasteurella multocida, Streptococcus suis	4	0.07
Actinobacillus pleuropneumoniae, Bordetella bronchiseptica, Glaesserella parasuis, Mesomycoplasma hyorhinis, Pasteurella multocida, PRRSV-1	4	0.07
Actinobacillus pleuropneumoniae, PCV2, PCV3, Glaesserella parasuis, Pasteurella multocida, PRRSV-1, Streptococcus suis	4	0.07
Actinobacillus pleuropneumoniae, PCV2, Glaesserella parasuis, Mesomycoplasma hyopneumoniae, Mesomycoplasma hyorhinis, PRRSV-1	4	0.07
Actinobacillus pleuropneumoniae, PCV2, Mesomycoplasma hyorhinis	4	0.07
Actinobacillus pleuropneumoniae, PCV2, Pasteurella multocida, PRRSV-1	4	0.07
Actinobacillus pleuropneumoniae, PCV3, Glaesserella parasuis	4	0.07
Actinobacillus pleuropneumoniae, PCV3, Glaesserella parasuis, Mesomycoplasma hyopneumoniae, Mesomycoplasma hyorhinis, Pasteurella multocida, PRRSV-1, Streptococcus suis	4	0.07
Actinobacillus pleuropneumoniae, PCV3, Glaesserella parasuis, Pasteurella multocida, Streptococcus suis	4	0.07
Actinobacillus pleuropneumoniae, PCV3, PRRSV-1	4	0.07
Actinobacillus pleuropneumoniae, Glaesserella parasuis, IAV, Mesomycoplasma hyopneumoniae, Mesomycoplasma hyorhinis, Pasteurella multocida, PRRSV-1, Streptococcus suis	4	0.07
Actinobacillus pleuropneumoniae, Glaesserella parasuis, IAV, PRRSV-1, Streptococcus suis	4	0.07
Actinobacillus pleuropneumoniae, Glaesserella parasuis, IAV, Streptococcus suis	4	0.07
Actinobacillus pleuropneumoniae, Glaesserella parasuis, Mesomycoplasma hyopneumoniae, PRRSV-1, Streptococcus suis	4	0.07
Actinobacillus suis, Actinobacillus pleuropneumoniae, Bordetella bronchiseptica, Glaesserella parasuis, IAV, Mesomycoplasma hyorhinis, Pasteurella multocida, Streptococcus suis	4	0.07
Actinobacillus suis, Actinobacillus pleuropneumoniae, Bordetella bronchiseptica, Glaesserella parasuis, Mesomycoplasma hyorhinis, Pasteurella multocida, PRRSV-1, Streptococcus suis	4	0.07
Actinobacillus suis, Actinobacillus pleuropneumoniae, PCV2, PCV3, Glaesserella parasuis, Mesomycoplasma hyorhinis, Pasteurella multocida, PRRSV-1, Streptococcus suis	4	0.07
Actinobacillus suis, PCV2, PCV3, Glaesserella parasuis, Mesomycoplasma hyorhinis, Pasteurella multocida, PRRSV-1, Streptococcus suis	4	0.07
Actinobacillus suis, PCV2, Glaesserella parasuis, Mesomycoplasma hyorhinis, PRRSV-1, Streptococcus suis	4	0.07
Actinobacillus suis, Glaesserella parasuis, Mesomycoplasma hyopneumoniae, Pasteurella multocida, PRRSV-1, Streptococcus suis	4	0.07
Bordetella bronchiseptica, PCV2, Glaesserella parasuis	4	0.07
Bordetella bronchiseptica, PCV2, Glaesserella parasuis, IAV, Mesomycoplasma hyopneumoniae, Mesomycoplasma hyorhinis, PRRSV-1, Streptococcus suis	4	0.07
Bordetella bronchiseptica, PCV2, Glaesserella parasuis, Mesomycoplasma hyopneumoniae, Mesomycoplasma hyorhinis, Pasteurella multocida, Streptococcus suis	4	0.07
Bordetella bronchiseptica, PCV2, Glaesserella parasuis, PRRSV-1, Streptococcus suis	4	0.07
Bordetella bronchiseptica, PCV2, Streptococcus suis	4	0.07
Bordetella bronchiseptica, PCV3, Glaesserella parasuis, Mesomycoplasma hyorhinis, Pasteurella multocida, Streptococcus suis	4	0.07
Bordetella bronchiseptica, Glaesserella parasuis, IAV, Mesomycoplasma hyopneumoniae, Mesomycoplasma hyorhinis, PRRSV-1, Streptococcus suis	4	0.07
Bordetella bronchiseptica, Glaesserella parasuis, IAV, Mesomycoplasma hyorhinis, PRRSV-1, Streptococcus suis	4	0.07
Bordetella bronchiseptica, Glaesserella parasuis, IAV, Mesomycoplasma hyorhinis, Pasteurella multocida, Streptococcus suis	4	0.07
Bordetella bronchiseptica, Mesomycoplasma hyorhinis, Streptococcus suis	4	0.07
PCV2, PCV3, Glaesserella parasuis, IAV, Mesomycoplasma hyorhinis, PRRSV-1, Streptococcus suis	4	0.07
PCV2, PCV3, Glaesserella parasuis, IAV, Mesomycoplasma hyorhinis, Pasteurella multocida, PRRSV-1, Streptococcus suis	4	0.07
PCV2, PCV3, Glaesserella parasuis, Mesomycoplasma hyorhinis, Pasteurella multocida, PRRSV-1, Streptococcus suis	4	0.07
PCV2, PCV3, Glaesserella parasuis, Mesomycoplasma hyorhinis, Pasteurella multocida, Streptococcus suis	4	0.07
PCV2, PCV3, Glaesserella parasuis, PRRSV-1	4	0.07
PCV2, PCV3, Glaesserella parasuis, Pasteurella multocida, PRRSV-1, Streptococcus suis	4	0.07
PCV2, Glaesserella parasuis, IAV, Mesomycoplasma hyorhinis, PRRSV-1	4	0.07
PCV2, Glaesserella parasuis, Mesomycoplasma hyopneumoniae	4	0.07
PCV2, Glaesserella parasuis, Mesomycoplasma hyopneumoniae, Mesomycoplasma hyorhinis	4	0.07
PCV2, IAV, Mesomycoplasma hyorhinis	4	0.07
PCV2, Mesomycoplasma hyopneumoniae, Mesomycoplasma hyorhinis	4	0.07
PCV2, Mesomycoplasma hyopneumoniae, Pasteurella multocida, PRRSV-1, Streptococcus suis	4	0.07
PCV2, Mesomycoplasma hyorhinis, Pasteurella multocida	4	0.07
PCV2, Mesomycoplasma hyorhinis, Streptococcus suis	4	0.07
PCV2, Pasteurella multocida, PRRSV-1, Streptococcus suis	4	0.07
PCV3, Glaesserella parasuis, IAV, Mesomycoplasma hyopneumoniae, Mesomycoplasma hyorhinis, PRRSV-1, Streptococcus suis	4	0.07
PCV3, Glaesserella parasuis, IAV, Mesomycoplasma hyorhinis	4	0.07
PCV3, Glaesserella parasuis, IAV, Mesomycoplasma hyorhinis, Pasteurella multocida, PRRSV-1, Streptococcus suis	4	0.07
PCV3, Glaesserella parasuis, Mesomycoplasma hyopneumoniae, Mesomycoplasma hyorhinis, PRRSV-1, Streptococcus suis	4	0.07
PCV3, Glaesserella parasuis, Mesomycoplasma hyopneumoniae, Mesomycoplasma hyorhinis, Pasteurella multocida, PRRSV-1, Streptococcus suis	4	0.07
PCV3, Glaesserella parasuis, Mesomycoplasma hyopneumoniae, Pasteurella multocida, Streptococcus suis	4	0.07
PCV3, Glaesserella parasuis, Mesomycoplasma hyorhinis	4	0.07
PCV3, Glaesserella parasuis, PRRSV-1	4	0.07
PCV3, Mesomycoplasma hyorhinis	4	0.07
PCV3, Pasteurella multocida, PRRSV-1, Streptococcus suis	4	0.07
Glaesserella parasuis, IAV, Mesomycoplasma hyopneumoniae, Mesomycoplasma hyorhinis, Pasteurella multocida, Streptococcus suis	4	0.07
Glaesserella parasuis, IAV, Mesomycoplasma hyopneumoniae, Pasteurella multocida, Streptococcus suis	4	0.07
Glaesserella parasuis, IAV, Mesomycoplasma hyorhinis, Pasteurella multocida, PRRSV-1	4	0.07
Glaesserella parasuis, IAV, PRRSV-1	4	0.07
Glaesserella parasuis, Mesomycoplasma hyopneumoniae, PRRSV-1	4	0.07
Glaesserella parasuis, Mesomycoplasma hyopneumoniae, Pasteurella multocida	4	0.07
IAV, Mesomycoplasma hyopneumoniae, Streptococcus suis	4	0.07
IAV, Mesomycoplasma hyorhinis	4	0.07
IAV, Mesomycoplasma hyorhinis, PRRSV-1	4	0.07
IAV, Mesomycoplasma hyorhinis, Streptococcus suis	4	0.07
Mesomycoplasma hyopneumoniae, Mesomycoplasma hyorhinis	4	0.07
Mesomycoplasma hyopneumoniae, Mesomycoplasma hyorhinis, Pasteurella multocida, PRRSV-1	4	0.07
Mesomycoplasma hyopneumoniae, PRRSV-1, Streptococcus suis	4	0.07
Actinobacillus pleuropneumoniae, Bordetella bronchiseptica, PCV2, PCV3, Glaesserella parasuis, Mesomycoplasma hyorhinis, PRRSV-1, Streptococcus suis	3	0.05
Actinobacillus pleuropneumoniae, Bordetella bronchiseptica, PCV2, Glaesserella parasuis	3	0.05
Actinobacillus pleuropneumoniae, Bordetella bronchiseptica, PCV2, Glaesserella parasuis, Mesomycoplasma hyopneumoniae, Pasteurella multocida, PRRSV-1, Streptococcus suis	3	0.05
Actinobacillus pleuropneumoniae, Bordetella bronchiseptica, PCV2, Glaesserella parasuis, Streptococcus suis	3	0.05
Actinobacillus pleuropneumoniae, Bordetella bronchiseptica, PCV3, Glaesserella parasuis, IAV, Mesomycoplasma hyorhinis, Pasteurella multocida, PRRSV-1, Streptococcus suis	3	0.05
Actinobacillus pleuropneumoniae, Bordetella bronchiseptica, Glaesserella parasuis, IAV, Mesomycoplasma hyorhinis, PRRSV-1	3	0.05
Actinobacillus pleuropneumoniae, Bordetella bronchiseptica, PRRSV-1	3	0.05
Actinobacillus pleuropneumoniae, Bordetella bronchiseptica, PRRSV-1, Streptococcus suis	3	0.05
Actinobacillus pleuropneumoniae, PCV2, PCV3	3	0.05
Actinobacillus pleuropneumoniae, PCV2, PCV3, Glaesserella parasuis, Mesomycoplasma hyopneumoniae, Mesomycoplasma hyorhinis, Pasteurella multocida, PRRSV-1, Streptococcus suis	3	0.05
Actinobacillus pleuropneumoniae, PCV2, PCV3, Glaesserella parasuis, Pasteurella multocida, Streptococcus suis	3	0.05
Actinobacillus pleuropneumoniae, PCV2, PCV3, Mesomycoplasma hyorhinis, PRRSV-1, Streptococcus suis	3	0.05
Actinobacillus pleuropneumoniae, PCV2, Glaesserella parasuis, IAV, Mesomycoplasma hyorhinis, Streptococcus suis	3	0.05
Actinobacillus pleuropneumoniae, PCV2, Glaesserella parasuis, Mesomycoplasma hyopneumoniae, Mesomycoplasma hyorhinis, PRRSV-1, Streptococcus suis	3	0.05
Actinobacillus pleuropneumoniae, PCV2, Glaesserella parasuis, Mesomycoplasma hyopneumoniae, PRRSV-1, Streptococcus suis	3	0.05
Actinobacillus pleuropneumoniae, PCV2, Glaesserella parasuis, Mesomycoplasma hyorhinis	3	0.05
Actinobacillus pleuropneumoniae, PCV2, IAV, PRRSV-1	3	0.05
Actinobacillus pleuropneumoniae, PCV2, Mesomycoplasma hyopneumoniae	3	0.05
Actinobacillus pleuropneumoniae, PCV2, Mesomycoplasma hyopneumoniae, PRRSV-1, Streptococcus suis	3	0.05
Actinobacillus pleuropneumoniae, PCV2, Mesomycoplasma hyorhinis, Pasteurella multocida	3	0.05
Actinobacillus pleuropneumoniae, PCV2, Mesomycoplasma hyorhinis, Streptococcus suis	3	0.05
Actinobacillus pleuropneumoniae, PCV2, PRRSV-2	3	0.05
Actinobacillus pleuropneumoniae, PCV2, Pasteurella multocida, Streptococcus suis	3	0.05
Actinobacillus pleuropneumoniae, PCV3, Glaesserella parasuis, Mesomycoplasma hyopneumoniae, Mesomycoplasma hyorhinis, PRRSV-1, Streptococcus suis	3	0.05
Actinobacillus pleuropneumoniae, PCV3, Glaesserella parasuis, Mesomycoplasma hyopneumoniae, Mesomycoplasma hyorhinis, Pasteurella multocida, Streptococcus suis	3	0.05
Actinobacillus pleuropneumoniae, PCV3, Glaesserella parasuis, Mesomycoplasma hyopneumoniae, Pasteurella multocida, Streptococcus suis	3	0.05
Actinobacillus pleuropneumoniae, PCV3, Glaesserella parasuis, Mesomycoplasma hyorhinis, Pasteurella multocida, Streptococcus suis	3	0.05
Actinobacillus pleuropneumoniae, PCV3, Mesomycoplasma hyorhinis, PRRSV-1	3	0.05
Actinobacillus pleuropneumoniae, PCV3, Streptococcus suis	3	0.05
Actinobacillus pleuropneumoniae, Glaesserella parasuis, IAV, Mesomycoplasma hyorhinis, Pasteurella multocida, PRRSV-1	3	0.05
Actinobacillus pleuropneumoniae, Glaesserella parasuis, IAV, Pasteurella multocida, PRRSV-1, Streptococcus suis	3	0.05
Actinobacillus pleuropneumoniae, Glaesserella parasuis, Mesomycoplasma hyopneumoniae, Mesomycoplasma hyorhinis, Pasteurella multocida	3	0.05
Actinobacillus pleuropneumoniae, Glaesserella parasuis, Mesomycoplasma hyopneumoniae, Mesomycoplasma hyorhinis, Pasteurella multocida, PRRSV-1	3	0.05
Actinobacillus pleuropneumoniae, Glaesserella parasuis, Mesomycoplasma hyopneumoniae, Pasteurella multocida	3	0.05
Actinobacillus pleuropneumoniae, Glaesserella parasuis, Mesomycoplasma hyopneumoniae, Pasteurella multocida, PRRSV-1	3	0.05
Actinobacillus pleuropneumoniae, Glaesserella parasuis, Mesomycoplasma hyorhinis, Pasteurella multocida	3	0.05
Actinobacillus pleuropneumoniae, IAV, PRRSV-1	3	0.05
Actinobacillus pleuropneumoniae, Mesomycoplasma hyopneumoniae, Mesomycoplasma hyorhinis, Pasteurella multocida, PRRSV-1, Streptococcus suis	3	0.05
Actinobacillus pleuropneumoniae, Mesomycoplasma hyopneumoniae, Pasteurella multocida, PRRSV-1, Streptococcus suis	3	0.05
Actinobacillus pleuropneumoniae, PRRSV-2	3	0.05
Actinobacillus pleuropneumoniae, Pasteurella multocida, PRRSV-1	3	0.05
Actinobacillus suis, Actinobacillus pleuropneumoniae, PCV2, Glaesserella parasuis, Pasteurella multocida, PRRSV-1, Streptococcus suis	3	0.05
Actinobacillus suis, Actinobacillus pleuropneumoniae, Glaesserella parasuis, Mesomycoplasma hyopneumoniae, Pasteurella multocida, Streptococcus suis	3	0.05
Actinobacillus suis, Actinobacillus pleuropneumoniae, Glaesserella parasuis, Mesomycoplasma hyorhinis, Streptococcus suis	3	0.05
Actinobacillus suis, Actinobacillus pleuropneumoniae, Glaesserella parasuis, Pasteurella multocida, PRRSV-1	3	0.05
Actinobacillus suis, Bordetella bronchiseptica, Glaesserella parasuis, Mesomycoplasma hyorhinis, Pasteurella multocida, PRRSV-1, Streptococcus suis	3	0.05
Actinobacillus suis, Bordetella bronchiseptica, Glaesserella parasuis, Pasteurella multocida, PRRSV-1, Streptococcus suis	3	0.05
Actinobacillus suis, PCV2, Glaesserella parasuis, Pasteurella multocida, PRRSV-1, Streptococcus suis	3	0.05
Actinobacillus suis, PCV2, Glaesserella parasuis, Streptococcus suis	3	0.05
Actinobacillus suis, PCV2, Mesomycoplasma hyopneumoniae, Pasteurella multocida, PRRSV-1, Streptococcus suis	3	0.05
Actinobacillus suis, Glaesserella parasuis	3	0.05
Actinobacillus suis, Glaesserella parasuis, IAV, Mesomycoplasma hyorhinis, Streptococcus suis	3	0.05
Actinobacillus suis, Glaesserella parasuis, Mesomycoplasma hyorhinis, Pasteurella multocida, PRRSV-1, Streptococcus suis	3	0.05
Actinobacillus suis, Glaesserella parasuis, Streptococcus suis	3	0.05
Actinobacillus suis, Mesomycoplasma hyorhinis, PRRSV-1, Streptococcus suis	3	0.05
Bordetella bronchiseptica, PCV2, PCV3, Glaesserella parasuis, Mesomycoplasma hyopneumoniae, Mesomycoplasma hyorhinis, Pasteurella multocida, PRRSV-1, Streptococcus suis	3	0.05
Bordetella bronchiseptica, PCV2, PCV3, Glaesserella parasuis, Mesomycoplasma hyorhinis, PRRSV-1, Streptococcus suis	3	0.05
Bordetella bronchiseptica, PCV2, PCV3, Glaesserella parasuis, Mesomycoplasma hyorhinis, Streptococcus suis	3	0.05
Bordetella bronchiseptica, PCV2, Glaesserella parasuis, IAV, Mesomycoplasma hyopneumoniae, Mesomycoplasma hyorhinis, Pasteurella multocida, PRRSV-1, Streptococcus suis	3	0.05
Bordetella bronchiseptica, PCV2, Glaesserella parasuis, IAV, Mesomycoplasma hyorhinis, PRRSV-1	3	0.05
Bordetella bronchiseptica, PCV2, Glaesserella parasuis, IAV, Mesomycoplasma hyorhinis, PRRSV-1, Streptococcus suis	3	0.05
Bordetella bronchiseptica, PCV2, Glaesserella parasuis, IAV, Mesomycoplasma hyorhinis, Pasteurella multocida, PRRSV-1, Streptococcus suis	3	0.05
Bordetella bronchiseptica, PCV2, Glaesserella parasuis, Mesomycoplasma hyorhinis, Pasteurella multocida, PRRSV-1	3	0.05
Bordetella bronchiseptica, PCV2, Mesomycoplasma hyopneumoniae, Mesomycoplasma hyorhinis, Pasteurella multocida, PRRSV-1, Streptococcus suis	3	0.05
Bordetella bronchiseptica, PCV2, PRRSV-1, Streptococcus suis	3	0.05
Bordetella bronchiseptica, PCV3, Glaesserella parasuis, Mesomycoplasma hyorhinis, PRRSV-1	3	0.05
Bordetella bronchiseptica, PCV3, Glaesserella parasuis, Mesomycoplasma hyorhinis, Pasteurella multocida, PRRSV-1	3	0.05
Bordetella bronchiseptica, PCV3, Streptococcus suis	3	0.05
Bordetella bronchiseptica, Glaesserella parasuis, IAV, Mesomycoplasma hyopneumoniae, Mesomycoplasma hyorhinis, Pasteurella multocida, PRRSV-1, Streptococcus suis	3	0.05
Bordetella bronchiseptica, Glaesserella parasuis, Mesomycoplasma hyopneumoniae, Mesomycoplasma hyorhinis, PRRSV-1	3	0.05
Bordetella bronchiseptica, Glaesserella parasuis, Mesomycoplasma hyopneumoniae, Mesomycoplasma hyorhinis, Pasteurella multocida, PRRSV-1, Streptococcus suis	3	0.05
Bordetella bronchiseptica, Glaesserella parasuis, Pasteurella multocida, Streptococcus suis	3	0.05
PCV2, PCV3, Glaesserella parasuis, Mesomycoplasma hyopneumoniae, Mesomycoplasma hyorhinis, PRRSV-1	3	0.05
PCV2, PCV3, Glaesserella parasuis, Mesomycoplasma hyopneumoniae, PRRSV-1, Streptococcus suis	3	0.05
PCV2, PCV3, Glaesserella parasuis, Mesomycoplasma hyorhinis, PRRSV-1	3	0.05
PCV2, PCV3, Glaesserella parasuis, Streptococcus suis	3	0.05
PCV2, PCV3, Mesomycoplasma hyopneumoniae, Pasteurella multocida, Streptococcus suis	3	0.05
PCV2, PCV3, Mesomycoplasma hyopneumoniae, Streptococcus suis	3	0.05
PCV2, PCV3, PRRSV-1, Streptococcus suis	3	0.05
PCV2, PCV3, Pasteurella multocida	3	0.05
PCV2, PCV3, Pasteurella multocida, Streptococcus suis	3	0.05
PCV2, Glaesserella parasuis, IAV, Mesomycoplasma hyorhinis, Streptococcus suis	3	0.05
PCV2, Glaesserella parasuis, IAV, Pasteurella multocida, PRRSV-1	3	0.05
PCV2, IAV, Mesomycoplasma hyopneumoniae, Mesomycoplasma hyorhinis, PRRSV-1, Streptococcus suis	3	0.05
PCV2, IAV, Mesomycoplasma hyopneumoniae, Pasteurella multocida, Streptococcus suis	3	0.05
PCV2, IAV, Mesomycoplasma hyorhinis, PRRSV-1, Streptococcus suis	3	0.05
PCV2, IAV, PRRSV-1	3	0.05
PCV2, IAV, PRRSV-1, Streptococcus suis	3	0.05
PCV2, IAV, Streptococcus suis	3	0.05
PCV2, Mesomycoplasma hyopneumoniae, Mesomycoplasma hyorhinis, Pasteurella multocida	3	0.05
PCV2, Mesomycoplasma hyopneumoniae, Mesomycoplasma hyorhinis, Pasteurella multocida, PRRSV-1, Streptococcus suis	3	0.05
PCV2, Mesomycoplasma hyopneumoniae, Mesomycoplasma hyorhinis, Pasteurella multocida, Streptococcus suis	3	0.05
PCV2, Mesomycoplasma hyopneumoniae, Mesomycoplasma hyorhinis, Streptococcus suis	3	0.05
PCV2, Mesomycoplasma hyorhinis, Pasteurella multocida, Streptococcus suis	3	0.05
PCV3, Glaesserella parasuis, IAV	3	0.05
PCV3, Glaesserella parasuis, IAV, Mesomycoplasma hyopneumoniae, Mesomycoplasma hyorhinis, Pasteurella multocida, Streptococcus suis	3	0.05
PCV3, Glaesserella parasuis, IAV, Streptococcus suis	3	0.05
PCV3, Glaesserella parasuis, Pasteurella multocida, PRRSV-1, Streptococcus suis	3	0.05
PCV3, IAV, Mesomycoplasma hyopneumoniae	3	0.05
PCV3, Mesomycoplasma hyopneumoniae, Pasteurella multocida, Streptococcus suis	3	0.05
PCV3, Mesomycoplasma hyorhinis, PRRSV-1, Streptococcus suis	3	0.05
PCV3, Mesomycoplasma hyorhinis, Pasteurella multocida, PRRSV-1, Streptococcus suis	3	0.05
Glaesserella parasuis, IAV, Mesomycoplasma hyorhinis, Pasteurella multocida	3	0.05
Glaesserella parasuis, IAV, Pasteurella multocida, PRRSV-1, Streptococcus suis	3	0.05
Glaesserella parasuis, Mesomycoplasma hyopneumoniae, Mesomycoplasma hyorhinis	3	0.05
IAV, Mesomycoplasma hyopneumoniae, Mesomycoplasma hyorhinis, PRRSV-1	3	0.05
IAV, Mesomycoplasma hyopneumoniae, Pasteurella multocida	3	0.05
IAV, Mesomycoplasma hyorhinis, PRRSV-1, Streptococcus suis	3	0.05
IAV, Pasteurella multocida	3	0.05
Mesomycoplasma hyopneumoniae, Mesomycoplasma hyorhinis, Pasteurella multocida, PRRSV-1, Streptococcus suis	3	0.05
Mesomycoplasma hyopneumoniae, Pasteurella multocida, PRRSV-1	3	0.05
Mesomycoplasma hyopneumoniae, Pasteurella multocida, PRRSV-1, Streptococcus suis	3	0.05
Mesomycoplasma hyorhinis, Pasteurella multocida, Streptococcus suis	3	0.05
Actinobacillus pleuropneumoniae, Bordetella bronchiseptica, PCV2, PCV3, Glaesserella parasuis, Mesomycoplasma hyopneumoniae, Mesomycoplasma hyorhinis, Pasteurella multocida, PRRSV-1, Streptococcus suis	2	0.03
Actinobacillus pleuropneumoniae, Bordetella bronchiseptica, PCV2, PCV3, Glaesserella parasuis, Mesomycoplasma hyorhinis, Pasteurella multocida, Streptococcus suis	2	0.03
Actinobacillus pleuropneumoniae, Bordetella bronchiseptica, PCV2, PCV3, Mesomycoplasma hyorhinis, PRRSV-1, Streptococcus suis	2	0.03
Actinobacillus pleuropneumoniae, Bordetella bronchiseptica, PCV2, Glaesserella parasuis, IAV, Mesomycoplasma hyorhinis, PRRSV-1, Streptococcus suis	2	0.03
Actinobacillus pleuropneumoniae, Bordetella bronchiseptica, PCV2, Glaesserella parasuis, Mesomycoplasma hyopneumoniae, Mesomycoplasma hyorhinis, PRRSV-1, Streptococcus suis	2	0.03
Actinobacillus pleuropneumoniae, Bordetella bronchiseptica, PCV2, Glaesserella parasuis, Mesomycoplasma hyorhinis	2	0.03
Actinobacillus pleuropneumoniae, Bordetella bronchiseptica, PCV2, Glaesserella parasuis, Pasteurella multocida, PRRSV-1, Streptococcus suis	2	0.03
Actinobacillus pleuropneumoniae, Bordetella bronchiseptica, PCV2, Mesomycoplasma hyopneumoniae, Mesomycoplasma hyorhinis, Pasteurella multocida, PRRSV-1	2	0.03
Actinobacillus pleuropneumoniae, Bordetella bronchiseptica, PCV2, Mesomycoplasma hyorhinis, Pasteurella multocida, PRRSV-1, Streptococcus suis	2	0.03
Actinobacillus pleuropneumoniae, Bordetella bronchiseptica, PCV2, PRRSV-1	2	0.03
Actinobacillus pleuropneumoniae, Bordetella bronchiseptica, PCV2, PRRSV-1, Streptococcus suis	2	0.03
Actinobacillus pleuropneumoniae, Bordetella bronchiseptica, PCV2, Pasteurella multocida, PRRSV-1, Streptococcus suis	2	0.03
Actinobacillus pleuropneumoniae, Bordetella bronchiseptica, PCV2, Streptococcus suis	2	0.03
Actinobacillus pleuropneumoniae, Bordetella bronchiseptica, PCV3	2	0.03
Actinobacillus pleuropneumoniae, Bordetella bronchiseptica, PCV3, Glaesserella parasuis, Mesomycoplasma hyopneumoniae, Mesomycoplasma hyorhinis, Pasteurella multocida, PRRSV-1, Streptococcus suis	2	0.03
Actinobacillus pleuropneumoniae, Bordetella bronchiseptica, PCV3, Glaesserella parasuis, Mesomycoplasma hyorhinis, PRRSV-1, Streptococcus suis	2	0.03
Actinobacillus pleuropneumoniae, Bordetella bronchiseptica, PCV3, Glaesserella parasuis, Mesomycoplasma hyorhinis, Pasteurella multocida, PRRSV-1	2	0.03
Actinobacillus pleuropneumoniae, Bordetella bronchiseptica, Glaesserella parasuis	2	0.03
Actinobacillus pleuropneumoniae, Bordetella bronchiseptica, Glaesserella parasuis, IAV, Mesomycoplasma hyopneumoniae, Mesomycoplasma hyorhinis, Pasteurella multocida, PRRSV-1, Streptococcus suis	2	0.03
Actinobacillus pleuropneumoniae, Bordetella bronchiseptica, Glaesserella parasuis, Mesomycoplasma hyopneumoniae, Mesomycoplasma hyorhinis, PRRSV-1, Streptococcus suis	2	0.03
Actinobacillus pleuropneumoniae, Bordetella bronchiseptica, Glaesserella parasuis, Mesomycoplasma hyopneumoniae, Mesomycoplasma hyorhinis, Streptococcus suis	2	0.03
Actinobacillus pleuropneumoniae, Bordetella bronchiseptica, Mesomycoplasma hyorhinis, PRRSV-1	2	0.03
Actinobacillus pleuropneumoniae, Bordetella bronchiseptica, Mesomycoplasma hyorhinis, Pasteurella multocida, Streptococcus suis	2	0.03
Actinobacillus pleuropneumoniae, Bordetella bronchiseptica, Pasteurella multocida, PRRSV-1, Streptococcus suis	2	0.03
Actinobacillus pleuropneumoniae, PCV2, PCV3, Glaesserella parasuis, IAV, Mesomycoplasma hyopneumoniae, Mesomycoplasma hyorhinis, Pasteurella multocida, Streptococcus suis	2	0.03
Actinobacillus pleuropneumoniae, PCV2, PCV3, Glaesserella parasuis, IAV, Mesomycoplasma hyorhinis, PRRSV-1, Streptococcus suis	2	0.03
Actinobacillus pleuropneumoniae, PCV2, PCV3, Glaesserella parasuis, IAV, Mesomycoplasma hyorhinis, Pasteurella multocida, PRRSV-1, Streptococcus suis	2	0.03
Actinobacillus pleuropneumoniae, PCV2, PCV3, Glaesserella parasuis, Mesomycoplasma hyopneumoniae, Mesomycoplasma hyorhinis, PRRSV-1, Streptococcus suis	2	0.03
Actinobacillus pleuropneumoniae, PCV2, PCV3, Glaesserella parasuis, Mesomycoplasma hyopneumoniae, Pasteurella multocida, PRRSV-1, Streptococcus suis	2	0.03
Actinobacillus pleuropneumoniae, PCV2, PCV3, Glaesserella parasuis, PRRSV-1	2	0.03
Actinobacillus pleuropneumoniae, PCV2, PCV3, Glaesserella parasuis, PRRSV-1, Streptococcus suis	2	0.03
Actinobacillus pleuropneumoniae, PCV2, PCV3, Glaesserella parasuis, Streptococcus suis	2	0.03
Actinobacillus pleuropneumoniae, PCV2, PCV3, Mesomycoplasma hyopneumoniae, Mesomycoplasma hyorhinis, Pasteurella multocida, PRRSV-1, Streptococcus suis	2	0.03
Actinobacillus pleuropneumoniae, PCV2, PCV3, Mesomycoplasma hyopneumoniae, Streptococcus suis	2	0.03
Actinobacillus pleuropneumoniae, PCV2, PCV3, PRRSV-1	2	0.03
Actinobacillus pleuropneumoniae, PCV2, PCV3, PRRSV-1, Streptococcus suis	2	0.03
Actinobacillus pleuropneumoniae, PCV2, PCV3, Streptococcus suis	2	0.03
Actinobacillus pleuropneumoniae, PCV2, Glaesserella parasuis, IAV, Mesomycoplasma hyopneumoniae, Mesomycoplasma hyorhinis, PRRSV-1, Streptococcus suis	2	0.03
Actinobacillus pleuropneumoniae, PCV2, Glaesserella parasuis, IAV, Mesomycoplasma hyopneumoniae, Mesomycoplasma hyorhinis, Pasteurella multocida, PRRSV-1, Streptococcus suis	2	0.03
Actinobacillus pleuropneumoniae, PCV2, Glaesserella parasuis, IAV, Mesomycoplasma hyopneumoniae, Mesomycoplasma hyorhinis, Streptococcus suis	2	0.03
Actinobacillus pleuropneumoniae, PCV2, Glaesserella parasuis, IAV, Mesomycoplasma hyorhinis, PRRSV-1, Streptococcus suis	2	0.03
Actinobacillus pleuropneumoniae, PCV2, Glaesserella parasuis, IAV, Mesomycoplasma hyorhinis, Pasteurella multocida, Streptococcus suis	2	0.03
Actinobacillus pleuropneumoniae, PCV2, Glaesserella parasuis, IAV, PRRSV-1, Streptococcus suis	2	0.03
Actinobacillus pleuropneumoniae, PCV2, Glaesserella parasuis, Mesomycoplasma hyopneumoniae, Mesomycoplasma hyorhinis, Pasteurella multocida	2	0.03
Actinobacillus pleuropneumoniae, PCV2, Glaesserella parasuis, Mesomycoplasma hyopneumoniae, Mesomycoplasma hyorhinis, Streptococcus suis	2	0.03
Actinobacillus pleuropneumoniae, PCV2, Glaesserella parasuis, Mesomycoplasma hyorhinis, Pasteurella multocida	2	0.03
Actinobacillus pleuropneumoniae, PCV2, IAV, Mesomycoplasma hyorhinis	2	0.03
Actinobacillus pleuropneumoniae, PCV2, Mesomycoplasma hyopneumoniae, Mesomycoplasma hyorhinis, PRRSV-1	2	0.03
Actinobacillus pleuropneumoniae, PCV2, Mesomycoplasma hyopneumoniae, Mesomycoplasma hyorhinis, PRRSV-1, Streptococcus suis	2	0.03
Actinobacillus pleuropneumoniae, PCV2, Mesomycoplasma hyopneumoniae, Mesomycoplasma hyorhinis, Pasteurella multocida	2	0.03
Actinobacillus pleuropneumoniae, PCV2, Mesomycoplasma hyopneumoniae, Pasteurella multocida, PRRSV-1	2	0.03
Actinobacillus pleuropneumoniae, PCV2, Mesomycoplasma hyopneumoniae, Pasteurella multocida, PRRSV-1, Streptococcus suis	2	0.03
Actinobacillus pleuropneumoniae, PCV2, Mesomycoplasma hyorhinis, Pasteurella multocida, PRRSV-1, Streptococcus suis	2	0.03
Actinobacillus pleuropneumoniae, PCV3, Glaesserella parasuis, IAV, Mesomycoplasma hyopneumoniae, Mesomycoplasma hyorhinis, Pasteurella multocida, PRRSV-1, Streptococcus suis	2	0.03
Actinobacillus pleuropneumoniae, PCV3, Glaesserella parasuis, IAV, Mesomycoplasma hyorhinis, Pasteurella multocida, PRRSV-1, Streptococcus suis	2	0.03
Actinobacillus pleuropneumoniae, PCV3, Glaesserella parasuis, IAV, Mesomycoplasma hyorhinis, Pasteurella multocida, Streptococcus suis	2	0.03
Actinobacillus pleuropneumoniae, PCV3, Glaesserella parasuis, IAV, Mesomycoplasma hyorhinis, Streptococcus suis	2	0.03
Actinobacillus pleuropneumoniae, PCV3, Glaesserella parasuis, Mesomycoplasma hyopneumoniae, Mesomycoplasma hyorhinis, PRRSV-1	2	0.03
Actinobacillus pleuropneumoniae, PCV3, Glaesserella parasuis, Mesomycoplasma hyopneumoniae, PRRSV-1	2	0.03
Actinobacillus pleuropneumoniae, PCV3, Glaesserella parasuis, Mesomycoplasma hyopneumoniae, Pasteurella multocida, PRRSV-1, Streptococcus suis	2	0.03
Actinobacillus pleuropneumoniae, PCV3, Glaesserella parasuis, Mesomycoplasma hyorhinis	2	0.03
Actinobacillus pleuropneumoniae, PCV3, Glaesserella parasuis, Mesomycoplasma hyorhinis, Pasteurella multocida, PRRSV-1	2	0.03
Actinobacillus pleuropneumoniae, PCV3, Glaesserella parasuis, Mesomycoplasma hyorhinis, Streptococcus suis	2	0.03
Actinobacillus pleuropneumoniae, PCV3, Glaesserella parasuis, PRRSV-1, Streptococcus suis	2	0.03
Actinobacillus pleuropneumoniae, PCV3, Glaesserella parasuis, Pasteurella multocida, PRRSV-1, Streptococcus suis	2	0.03
Actinobacillus pleuropneumoniae, PCV3, Glaesserella parasuis, Streptococcus suis	2	0.03
Actinobacillus pleuropneumoniae, PCV3, Mesomycoplasma hyopneumoniae	2	0.03
Actinobacillus pleuropneumoniae, PCV3, Mesomycoplasma hyopneumoniae, Pasteurella multocida, Streptococcus suis	2	0.03
Actinobacillus pleuropneumoniae, PCV3, Mesomycoplasma hyorhinis, PRRSV-1, Streptococcus suis	2	0.03
Actinobacillus pleuropneumoniae, PCV3, PRRSV-1, Streptococcus suis	2	0.03
Actinobacillus pleuropneumoniae, PCV3, Pasteurella multocida, Streptococcus suis	2	0.03
Actinobacillus pleuropneumoniae, Glaesserella parasuis, IAV	2	0.03
Actinobacillus pleuropneumoniae, Glaesserella parasuis, IAV, Mesomycoplasma hyopneumoniae, Mesomycoplasma hyorhinis, PRRSV-1, Streptococcus suis	2	0.03
Actinobacillus pleuropneumoniae, Glaesserella parasuis, IAV, Mesomycoplasma hyopneumoniae, Pasteurella multocida, Streptococcus suis	2	0.03
Actinobacillus pleuropneumoniae, Glaesserella parasuis, Mesomycoplasma hyopneumoniae, Mesomycoplasma hyorhinis	2	0.03
Actinobacillus pleuropneumoniae, Glaesserella parasuis, Mesomycoplasma hyopneumoniae, Streptococcus suis	2	0.03
Actinobacillus pleuropneumoniae, IAV, Mesomycoplasma hyorhinis, PRRSV-1	2	0.03
Actinobacillus pleuropneumoniae, IAV, Streptococcus suis	2	0.03
Actinobacillus pleuropneumoniae, Mesomycoplasma hyopneumoniae, Mesomycoplasma hyorhinis, PRRSV-1, Streptococcus suis	2	0.03
Actinobacillus pleuropneumoniae, Mesomycoplasma hyopneumoniae, Mesomycoplasma hyorhinis, Pasteurella multocida, Streptococcus suis	2	0.03
Actinobacillus pleuropneumoniae, Mesomycoplasma hyopneumoniae, PRRSV-1, Streptococcus suis	2	0.03
Actinobacillus suis, Actinobacillus pleuropneumoniae, Bordetella bronchiseptica, PCV2, Glaesserella parasuis, IAV, Mesomycoplasma hyorhinis, Pasteurella multocida, PRRSV-1, Streptococcus suis	2	0.03
Actinobacillus suis, Actinobacillus pleuropneumoniae, Bordetella bronchiseptica, PCV2, Glaesserella parasuis, PRRSV-1, Streptococcus suis	2	0.03
Actinobacillus suis, Actinobacillus pleuropneumoniae, Bordetella bronchiseptica, Glaesserella parasuis, IAV, Mesomycoplasma hyorhinis, Pasteurella multocida, PRRSV-1, Streptococcus suis	2	0.03
Actinobacillus suis, Actinobacillus pleuropneumoniae, Bordetella bronchiseptica, Glaesserella parasuis, Mesomycoplasma hyorhinis, PRRSV-1, Streptococcus suis	2	0.03
Actinobacillus suis, Actinobacillus pleuropneumoniae, PCV2	2	0.03
Actinobacillus suis, Actinobacillus pleuropneumoniae, PCV2, PCV3, Glaesserella parasuis, Pasteurella multocida, PRRSV-1, Streptococcus suis	2	0.03
Actinobacillus suis, Actinobacillus pleuropneumoniae, PCV2, PCV3, Pasteurella multocida	2	0.03
Actinobacillus suis, Actinobacillus pleuropneumoniae, PCV2, Glaesserella parasuis, IAV, Mesomycoplasma hyorhinis, Pasteurella multocida, PRRSV-1, Streptococcus suis	2	0.03
Actinobacillus suis, Actinobacillus pleuropneumoniae, PCV2, Glaesserella parasuis, Mesomycoplasma hyopneumoniae, Pasteurella multocida, Streptococcus suis	2	0.03
Actinobacillus suis, Actinobacillus pleuropneumoniae, PCV2, PRRSV-1, Streptococcus suis	2	0.03
Actinobacillus suis, Actinobacillus pleuropneumoniae, PCV2, Pasteurella multocida, PRRSV-1, Streptococcus suis	2	0.03
Actinobacillus suis, Actinobacillus pleuropneumoniae, PCV3, Glaesserella parasuis, IAV, Mesomycoplasma hyopneumoniae, Mesomycoplasma hyorhinis, Pasteurella multocida, PRRSV-1, Streptococcus suis	2	0.03
Actinobacillus suis, Actinobacillus pleuropneumoniae, PCV3, Glaesserella parasuis, Pasteurella multocida, PRRSV-1, Streptococcus suis	2	0.03
Actinobacillus suis, Actinobacillus pleuropneumoniae, Glaesserella parasuis	2	0.03
Actinobacillus suis, Actinobacillus pleuropneumoniae, Glaesserella parasuis, IAV, Mesomycoplasma hyorhinis, Pasteurella multocida, PRRSV-1, Streptococcus suis	2	0.03
Actinobacillus suis, Actinobacillus pleuropneumoniae, Glaesserella parasuis, IAV, Mesomycoplasma hyorhinis, Streptococcus suis	2	0.03
Actinobacillus suis, Actinobacillus pleuropneumoniae, Glaesserella parasuis, Pasteurella multocida, PRRSV-1, Streptococcus suis	2	0.03
Actinobacillus suis, Actinobacillus pleuropneumoniae, Glaesserella parasuis, Streptococcus suis	2	0.03
Actinobacillus suis, Actinobacillus pleuropneumoniae, Mesomycoplasma hyopneumoniae, Pasteurella multocida, Streptococcus suis	2	0.03
Actinobacillus suis, Actinobacillus pleuropneumoniae, Pasteurella multocida, PRRSV-1, Streptococcus suis	2	0.03
Actinobacillus suis, Bordetella bronchiseptica, PCV2, PCV3, Glaesserella parasuis, IAV, Mesomycoplasma hyorhinis, Pasteurella multocida, PRRSV-1, Streptococcus suis	2	0.03
Actinobacillus suis, Bordetella bronchiseptica, PCV2, PCV3, Glaesserella parasuis, Mesomycoplasma hyorhinis, Pasteurella multocida, PRRSV-1, Streptococcus suis	2	0.03
Actinobacillus suis, Bordetella bronchiseptica, PCV2, Glaesserella parasuis, IAV, Mesomycoplasma hyopneumoniae, Mesomycoplasma hyorhinis, PRRSV-1, Streptococcus suis	2	0.03
Actinobacillus suis, Bordetella bronchiseptica, PCV2, Glaesserella parasuis, Mesomycoplasma hyorhinis, PRRSV-1, Streptococcus suis	2	0.03
Actinobacillus suis, Bordetella bronchiseptica, PCV3, Glaesserella parasuis, IAV, Mesomycoplasma hyorhinis, Streptococcus suis	2	0.03
Actinobacillus suis, Bordetella bronchiseptica, Glaesserella parasuis, Streptococcus suis	2	0.03
Actinobacillus suis, PCV2, Glaesserella parasuis, IAV, Streptococcus suis	2	0.03
Actinobacillus suis, PCV2, Glaesserella parasuis, Mesomycoplasma hyopneumoniae, Mesomycoplasma hyorhinis, PRRSV-1, Streptococcus suis	2	0.03
Actinobacillus suis, PCV2, Glaesserella parasuis, Mesomycoplasma hyorhinis, Pasteurella multocida, Streptococcus suis	2	0.03
Actinobacillus suis, PCV2, Glaesserella parasuis, PRRSV-1, Streptococcus suis	2	0.03
Actinobacillus suis, PCV2, Mesomycoplasma hyorhinis, PRRSV-1	2	0.03
Actinobacillus suis, PCV2, Pasteurella multocida	2	0.03
Actinobacillus suis, PCV3, Glaesserella parasuis, IAV, Mesomycoplasma hyorhinis, Streptococcus suis	2	0.03
Actinobacillus suis, PCV3, Glaesserella parasuis, Mesomycoplasma hyorhinis, Pasteurella multocida, PRRSV-1, Streptococcus suis	2	0.03
Actinobacillus suis, PCV3, Glaesserella parasuis, Streptococcus suis	2	0.03
Actinobacillus suis, Glaesserella parasuis, IAV, Mesomycoplasma hyorhinis, Pasteurella multocida, PRRSV-1, Streptococcus suis	2	0.03
Actinobacillus suis, Glaesserella parasuis, Mesomycoplasma hyopneumoniae, Streptococcus suis	2	0.03
Actinobacillus suis, Glaesserella parasuis, Mesomycoplasma hyorhinis, PRRSV-1, Streptococcus suis	2	0.03
Actinobacillus suis, Glaesserella parasuis, PRRSV-1, Streptococcus suis	2	0.03
Actinobacillus suis, Glaesserella parasuis, Pasteurella multocida, Streptococcus suis	2	0.03
Actinobacillus suis, IAV	2	0.03
Actinobacillus suis, PRRSV-1	2	0.03
Actinobacillus suis, PRRSV-1, Streptococcus suis	2	0.03
Actinobacillus suis, Pasteurella multocida	2	0.03
Bordetella bronchiseptica, PCV2, PCV3	2	0.03
Bordetella bronchiseptica, PCV2, PCV3, Glaesserella parasuis, IAV, Mesomycoplasma hyorhinis, Pasteurella multocida, Streptococcus suis	2	0.03
Bordetella bronchiseptica, PCV2, PCV3, Glaesserella parasuis, Mesomycoplasma hyopneumoniae, Mesomycoplasma hyorhinis, PRRSV-1, Streptococcus suis	2	0.03
Bordetella bronchiseptica, PCV2, PCV3, Glaesserella parasuis, PRRSV-1, Streptococcus suis	2	0.03
Bordetella bronchiseptica, PCV2, PCV3, Mesomycoplasma hyopneumoniae, Mesomycoplasma hyorhinis, PRRSV-1, Streptococcus suis	2	0.03
Bordetella bronchiseptica, PCV2, Glaesserella parasuis, IAV, Mesomycoplasma hyorhinis, Pasteurella multocida, Streptococcus suis	2	0.03
Bordetella bronchiseptica, PCV2, Glaesserella parasuis, IAV, PRRSV-1, Streptococcus suis	2	0.03
Bordetella bronchiseptica, PCV2, Glaesserella parasuis, Mesomycoplasma hyopneumoniae, Mesomycoplasma hyorhinis, Pasteurella multocida, PRRSV-1	2	0.03
Bordetella bronchiseptica, PCV2, Glaesserella parasuis, Mesomycoplasma hyopneumoniae, Pasteurella multocida, PRRSV-1, Streptococcus suis	2	0.03
Bordetella bronchiseptica, PCV2, Glaesserella parasuis, PRRSV-1	2	0.03
Bordetella bronchiseptica, PCV2, Glaesserella parasuis, Pasteurella multocida, Streptococcus suis	2	0.03
Bordetella bronchiseptica, PCV2, Mesomycoplasma hyorhinis, PRRSV-1, Streptococcus suis	2	0.03
Bordetella bronchiseptica, PCV2, Mesomycoplasma hyorhinis, Streptococcus suis	2	0.03
Bordetella bronchiseptica, PCV2, PRRSV-1	2	0.03
Bordetella bronchiseptica, PCV3, Glaesserella parasuis, IAV, Mesomycoplasma hyorhinis, PRRSV-1, Streptococcus suis	2	0.03
Bordetella bronchiseptica, PCV3, Glaesserella parasuis, IAV, Mesomycoplasma hyorhinis, Streptococcus suis	2	0.03
Bordetella bronchiseptica, PCV3, Glaesserella parasuis, Mesomycoplasma hyopneumoniae, Mesomycoplasma hyorhinis, Pasteurella multocida, PRRSV-1, Streptococcus suis	2	0.03
Bordetella bronchiseptica, PCV3, Glaesserella parasuis, Mesomycoplasma hyorhinis	2	0.03
Bordetella bronchiseptica, PCV3, Mesomycoplasma hyorhinis, PRRSV-1, Streptococcus suis	2	0.03
Bordetella bronchiseptica, Glaesserella parasuis, IAV, Mesomycoplasma hyorhinis, PRRSV-1	2	0.03
Bordetella bronchiseptica, Glaesserella parasuis, IAV, PRRSV-1, Streptococcus suis	2	0.03
Bordetella bronchiseptica, Glaesserella parasuis, Mesomycoplasma hyopneumoniae, Mesomycoplasma hyorhinis, Pasteurella multocida, Streptococcus suis	2	0.03
Bordetella bronchiseptica, Glaesserella parasuis, Mesomycoplasma hyopneumoniae, Mesomycoplasma hyorhinis, Streptococcus suis	2	0.03
Bordetella bronchiseptica, IAV, PRRSV-1, Streptococcus suis	2	0.03
Bordetella bronchiseptica, Mesomycoplasma hyopneumoniae, Mesomycoplasma hyorhinis	2	0.03
Bordetella bronchiseptica, Mesomycoplasma hyopneumoniae, Mesomycoplasma hyorhinis, PRRSV-1, Streptococcus suis	2	0.03
Bordetella bronchiseptica, Mesomycoplasma hyorhinis, Pasteurella multocida, PRRSV-1, Streptococcus suis	2	0.03
PCV2, PCV3, Glaesserella parasuis, IAV, Mesomycoplasma hyopneumoniae, Mesomycoplasma hyorhinis, Pasteurella multocida, PRRSV-1, Streptococcus suis	2	0.03
PCV2, PCV3, Glaesserella parasuis, IAV, Mesomycoplasma hyopneumoniae, Pasteurella multocida, Streptococcus suis	2	0.03
PCV2, PCV3, Glaesserella parasuis, Mesomycoplasma hyopneumoniae, Mesomycoplasma hyorhinis, PRRSV-1, Streptococcus suis	2	0.03
PCV2, PCV3, Glaesserella parasuis, Mesomycoplasma hyopneumoniae, Mesomycoplasma hyorhinis, Pasteurella multocida	2	0.03
PCV2, PCV3, Glaesserella parasuis, Mesomycoplasma hyopneumoniae, Mesomycoplasma hyorhinis, Pasteurella multocida, Streptococcus suis	2	0.03
PCV2, PCV3, Glaesserella parasuis, Mesomycoplasma hyopneumoniae, Mesomycoplasma hyorhinis, Streptococcus suis	2	0.03
PCV2, PCV3, Glaesserella parasuis, Mesomycoplasma hyopneumoniae, Pasteurella multocida, Streptococcus suis	2	0.03
PCV2, PCV3, Glaesserella parasuis, Mesomycoplasma hyopneumoniae, Streptococcus suis	2	0.03
PCV2, PCV3, Glaesserella parasuis, Mesomycoplasma hyorhinis	2	0.03
PCV2, PCV3, Glaesserella parasuis, Mesomycoplasma hyorhinis, Pasteurella multocida, PRRSV-1	2	0.03
PCV2, PCV3, Glaesserella parasuis, Mesomycoplasma hyorhinis, Streptococcus suis	2	0.03
PCV2, PCV3, IAV, Mesomycoplasma hyopneumoniae, Streptococcus suis	2	0.03
PCV2, PCV3, IAV, Mesomycoplasma hyorhinis, PRRSV-1, Streptococcus suis	2	0.03
PCV2, PCV3, Mesomycoplasma hyopneumoniae, Mesomycoplasma hyorhinis, PRRSV-1, Streptococcus suis	2	0.03
PCV2, PCV3, Mesomycoplasma hyopneumoniae, Mesomycoplasma hyorhinis, Pasteurella multocida	2	0.03
PCV2, PCV3, Mesomycoplasma hyopneumoniae, Mesomycoplasma hyorhinis, Pasteurella multocida, PRRSV-1, Streptococcus suis	2	0.03
PCV2, PCV3, Mesomycoplasma hyorhinis	2	0.03
PCV2, Glaesserella parasuis, IAV, Mesomycoplasma hyopneumoniae, Mesomycoplasma hyorhinis, PRRSV-1	2	0.03
PCV2, Glaesserella parasuis, IAV, Mesomycoplasma hyopneumoniae, Mesomycoplasma hyorhinis, PRRSV-1, Streptococcus suis	2	0.03
PCV2, Glaesserella parasuis, IAV, Mesomycoplasma hyorhinis	2	0.03
PCV2, Glaesserella parasuis, IAV, Mesomycoplasma hyorhinis, Pasteurella multocida, PRRSV-1	2	0.03
PCV2, Glaesserella parasuis, IAV, Mesomycoplasma hyorhinis, Pasteurella multocida, Streptococcus suis	2	0.03
PCV2, Glaesserella parasuis, Mesomycoplasma hyopneumoniae, PRRSV-1	2	0.03
PCV2, Glaesserella parasuis, Mesomycoplasma hyopneumoniae, Pasteurella multocida	2	0.03
PCV2, Glaesserella parasuis, Mesomycoplasma hyopneumoniae, Pasteurella multocida, PRRSV-1	2	0.03
PCV2, Glaesserella parasuis, Mesomycoplasma hyopneumoniae, Streptococcus suis	2	0.03
PCV2, IAV, Mesomycoplasma hyopneumoniae, Mesomycoplasma hyorhinis, Streptococcus suis	2	0.03
PCV2, IAV, Mesomycoplasma hyorhinis, Streptococcus suis	2	0.03
PCV3, Glaesserella parasuis, IAV, Mesomycoplasma hyorhinis, PRRSV-1	2	0.03
PCV3, Glaesserella parasuis, IAV, Mesomycoplasma hyorhinis, Pasteurella multocida, Streptococcus suis	2	0.03
PCV3, Glaesserella parasuis, IAV, Mesomycoplasma hyorhinis, Streptococcus suis	2	0.03
PCV3, Glaesserella parasuis, IAV, PRRSV-1	2	0.03
PCV3, Glaesserella parasuis, IAV, Pasteurella multocida, Streptococcus suis	2	0.03
PCV3, Glaesserella parasuis, Mesomycoplasma hyopneumoniae, Mesomycoplasma hyorhinis, Pasteurella multocida	2	0.03
PCV3, Glaesserella parasuis, Mesomycoplasma hyopneumoniae, Mesomycoplasma hyorhinis, Streptococcus suis	2	0.03
PCV3, Glaesserella parasuis, Mesomycoplasma hyopneumoniae, PRRSV-1, Streptococcus suis	2	0.03
PCV3, Glaesserella parasuis, Mesomycoplasma hyorhinis, PRRSV-1	2	0.03
PCV3, Glaesserella parasuis, Mesomycoplasma hyorhinis, Pasteurella multocida	2	0.03
PCV3, Glaesserella parasuis, Pasteurella multocida	2	0.03
PCV3, Glaesserella parasuis, Pasteurella multocida, Streptococcus suis	2	0.03
PCV3, IAV	2	0.03
PCV3, IAV, PRRSV-1	2	0.03
PCV3, Mesomycoplasma hyopneumoniae, Mesomycoplasma hyorhinis	2	0.03
PCV3, Mesomycoplasma hyopneumoniae, PRRSV-1	2	0.03
PCV3, Mesomycoplasma hyopneumoniae, Pasteurella multocida	2	0.03
PCV3, Mesomycoplasma hyorhinis, Pasteurella multocida	2	0.03
Glaesserella parasuis, IAV, Mesomycoplasma hyopneumoniae, Mesomycoplasma hyorhinis, Streptococcus suis	2	0.03
Glaesserella parasuis, IAV, Mesomycoplasma hyopneumoniae, Pasteurella multocida	2	0.03
Glaesserella parasuis, IAV, Mesomycoplasma hyopneumoniae, Pasteurella multocida, PRRSV-1	2	0.03
Glaesserella parasuis, Mesomycoplasma hyopneumoniae	2	0.03
IAV, Streptococcus suis	2	0.03
Mesomycoplasma hyopneumoniae, Mesomycoplasma hyorhinis, Pasteurella multocida, Streptococcus suis	2	0.03
Mesomycoplasma hyorhinis, Pasteurella multocida	2	0.03
Actinobacillus pleuropneumoniae, Bordetella bronchiseptica, PCV2, PCV3, Glaesserella parasuis, IAV, Mesomycoplasma hyorhinis	1	0.02
Actinobacillus pleuropneumoniae, Bordetella bronchiseptica, PCV2, PCV3, Glaesserella parasuis, IAV, Mesomycoplasma hyorhinis, Pasteurella multocida, PRRSV-1, Streptococcus suis	1	0.02
Actinobacillus pleuropneumoniae, Bordetella bronchiseptica, PCV2, PCV3, Glaesserella parasuis, IAV, Mesomycoplasma hyorhinis, Pasteurella multocida, Streptococcus suis	1	0.02
Actinobacillus pleuropneumoniae, Bordetella bronchiseptica, PCV2, PCV3, Glaesserella parasuis, Mesomycoplasma hyopneumoniae, Mesomycoplasma hyorhinis, PRRSV-1, Streptococcus suis	1	0.02
Actinobacillus pleuropneumoniae, Bordetella bronchiseptica, PCV2, PCV3, Glaesserella parasuis, Mesomycoplasma hyopneumoniae, Mesomycoplasma hyorhinis, Pasteurella multocida, PRRSV-1	1	0.02
Actinobacillus pleuropneumoniae, Bordetella bronchiseptica, PCV2, PCV3, Glaesserella parasuis, Mesomycoplasma hyorhinis, PRRSV-1	1	0.02
Actinobacillus pleuropneumoniae, Bordetella bronchiseptica, PCV2, PCV3, Glaesserella parasuis, PRRSV-1	1	0.02
Actinobacillus pleuropneumoniae, Bordetella bronchiseptica, PCV2, PCV3, Glaesserella parasuis, Streptococcus suis	1	0.02
Actinobacillus pleuropneumoniae, Bordetella bronchiseptica, PCV2, PCV3, IAV, Mesomycoplasma hyopneumoniae, Mesomycoplasma hyorhinis, Pasteurella multocida, Streptococcus suis	1	0.02
Actinobacillus pleuropneumoniae, Bordetella bronchiseptica, PCV2, PCV3, Mesomycoplasma hyopneumoniae, Mesomycoplasma hyorhinis	1	0.02
Actinobacillus pleuropneumoniae, Bordetella bronchiseptica, PCV2, PCV3, Mesomycoplasma hyopneumoniae, Mesomycoplasma hyorhinis, PRRSV-1, Streptococcus suis	1	0.02
Actinobacillus pleuropneumoniae, Bordetella bronchiseptica, PCV2, PCV3, Mesomycoplasma hyopneumoniae, Mesomycoplasma hyorhinis, Pasteurella multocida, PRRSV-1, Streptococcus suis	1	0.02
Actinobacillus pleuropneumoniae, Bordetella bronchiseptica, PCV2, PCV3, Mesomycoplasma hyorhinis, PRRSV-1, PRRSV-2, Streptococcus suis	1	0.02
Actinobacillus pleuropneumoniae, Bordetella bronchiseptica, PCV2, PCV3, Pasteurella multocida	1	0.02
Actinobacillus pleuropneumoniae, Bordetella bronchiseptica, PCV2, Glaesserella parasuis, IAV, Mesomycoplasma hyopneumoniae, Mesomycoplasma hyorhinis, Pasteurella multocida, PRRSV-1, Streptococcus suis	1	0.02
Actinobacillus pleuropneumoniae, Bordetella bronchiseptica, PCV2, Glaesserella parasuis, IAV, Mesomycoplasma hyorhinis, Pasteurella multocida, PRRSV-1, Streptococcus suis	1	0.02
Actinobacillus pleuropneumoniae, Bordetella bronchiseptica, PCV2, Glaesserella parasuis, IAV, Pasteurella multocida, PRRSV-1, Streptococcus suis	1	0.02
Actinobacillus pleuropneumoniae, Bordetella bronchiseptica, PCV2, Glaesserella parasuis, Mesomycoplasma hyopneumoniae, Mesomycoplasma hyorhinis, Pasteurella multocida, PRRSV-1	1	0.02
Actinobacillus pleuropneumoniae, Bordetella bronchiseptica, PCV2, Glaesserella parasuis, Mesomycoplasma hyopneumoniae, PRRSV-1, Streptococcus suis	1	0.02
Actinobacillus pleuropneumoniae, Bordetella bronchiseptica, PCV2, Glaesserella parasuis, Mesomycoplasma hyorhinis, Pasteurella multocida	1	0.02
Actinobacillus pleuropneumoniae, Bordetella bronchiseptica, PCV2, Glaesserella parasuis, Pasteurella multocida	1	0.02
Actinobacillus pleuropneumoniae, Bordetella bronchiseptica, PCV2, Glaesserella parasuis, Pasteurella multocida, Streptococcus suis	1	0.02
Actinobacillus pleuropneumoniae, Bordetella bronchiseptica, PCV2, IAV, Mesomycoplasma hyopneumoniae, Mesomycoplasma hyorhinis, PRRSV-1, Streptococcus suis	1	0.02
Actinobacillus pleuropneumoniae, Bordetella bronchiseptica, PCV2, IAV, Mesomycoplasma hyorhinis, Pasteurella multocida, PRRSV-1	1	0.02
Actinobacillus pleuropneumoniae, Bordetella bronchiseptica, PCV2, Mesomycoplasma hyopneumoniae, Mesomycoplasma hyorhinis, PRRSV-1, Streptococcus suis	1	0.02
Actinobacillus pleuropneumoniae, Bordetella bronchiseptica, PCV2, Mesomycoplasma hyopneumoniae, Mesomycoplasma hyorhinis, Pasteurella multocida, PRRSV-1, Streptococcus suis	1	0.02
Actinobacillus pleuropneumoniae, Bordetella bronchiseptica, PCV2, Mesomycoplasma hyorhinis, PRRSV-1	1	0.02
Actinobacillus pleuropneumoniae, Bordetella bronchiseptica, PCV2, Mesomycoplasma hyorhinis, PRRSV-1, Streptococcus suis	1	0.02
Actinobacillus pleuropneumoniae, Bordetella bronchiseptica, PCV2, Pasteurella multocida, PRRSV-1	1	0.02
Actinobacillus pleuropneumoniae, Bordetella bronchiseptica, PCV2, Pasteurella multocida, Streptococcus suis	1	0.02
Actinobacillus pleuropneumoniae, Bordetella bronchiseptica, PCV3, Glaesserella parasuis, IAV	1	0.02
Actinobacillus pleuropneumoniae, Bordetella bronchiseptica, PCV3, Glaesserella parasuis, IAV, Mesomycoplasma hyopneumoniae, Mesomycoplasma hyorhinis, Pasteurella multocida, PRRSV-1, Streptococcus suis	1	0.02
Actinobacillus pleuropneumoniae, Bordetella bronchiseptica, PCV3, Glaesserella parasuis, IAV, Mesomycoplasma hyorhinis, Streptococcus suis	1	0.02
Actinobacillus pleuropneumoniae, Bordetella bronchiseptica, PCV3, Glaesserella parasuis, IAV, Pasteurella multocida, Streptococcus suis	1	0.02
Actinobacillus pleuropneumoniae, Bordetella bronchiseptica, PCV3, Glaesserella parasuis, Mesomycoplasma hyopneumoniae, Mesomycoplasma hyorhinis, Pasteurella multocida, Streptococcus suis	1	0.02
Actinobacillus pleuropneumoniae, Bordetella bronchiseptica, PCV3, Glaesserella parasuis, Mesomycoplasma hyopneumoniae, PRRSV-1, Streptococcus suis	1	0.02
Actinobacillus pleuropneumoniae, Bordetella bronchiseptica, PCV3, Glaesserella parasuis, Mesomycoplasma hyorhinis, PRRSV-1	1	0.02
Actinobacillus pleuropneumoniae, Bordetella bronchiseptica, PCV3, Glaesserella parasuis, Mesomycoplasma hyorhinis, PRRSV-2, Streptococcus suis	1	0.02
Actinobacillus pleuropneumoniae, Bordetella bronchiseptica, PCV3, Glaesserella parasuis, PRRSV-1, Streptococcus suis	1	0.02
Actinobacillus pleuropneumoniae, Bordetella bronchiseptica, PCV3, Glaesserella parasuis, Pasteurella multocida	1	0.02
Actinobacillus pleuropneumoniae, Bordetella bronchiseptica, PCV3, Glaesserella parasuis, Pasteurella multocida, PRRSV-1	1	0.02
Actinobacillus pleuropneumoniae, Bordetella bronchiseptica, PCV3, Pasteurella multocida	1	0.02
Actinobacillus pleuropneumoniae, Bordetella bronchiseptica, Glaesserella parasuis, IAV	1	0.02
Actinobacillus pleuropneumoniae, Bordetella bronchiseptica, Glaesserella parasuis, IAV, Mesomycoplasma hyopneumoniae, Mesomycoplasma hyorhinis, Pasteurella multocida, Streptococcus suis	1	0.02
Actinobacillus pleuropneumoniae, Bordetella bronchiseptica, Glaesserella parasuis, IAV, Mesomycoplasma hyorhinis, PRRSV-1, Streptococcus suis	1	0.02
Actinobacillus pleuropneumoniae, Bordetella bronchiseptica, Glaesserella parasuis, IAV, Mesomycoplasma hyorhinis, Pasteurella multocida, Streptococcus suis	1	0.02
Actinobacillus pleuropneumoniae, Bordetella bronchiseptica, Glaesserella parasuis, IAV, Mesomycoplasma hyorhinis, Streptococcus suis	1	0.02
Actinobacillus pleuropneumoniae, Bordetella bronchiseptica, Glaesserella parasuis, IAV, Pasteurella multocida, Streptococcus suis	1	0.02
Actinobacillus pleuropneumoniae, Bordetella bronchiseptica, Glaesserella parasuis, Mesomycoplasma hyopneumoniae, Mesomycoplasma hyorhinis, Pasteurella multocida, PRRSV-1	1	0.02
Actinobacillus pleuropneumoniae, Bordetella bronchiseptica, Glaesserella parasuis, Mesomycoplasma hyopneumoniae, Pasteurella multocida, PRRSV-1	1	0.02
Actinobacillus pleuropneumoniae, Bordetella bronchiseptica, Glaesserella parasuis, Mesomycoplasma hyopneumoniae, Pasteurella multocida, PRRSV-1, Streptococcus suis	1	0.02
Actinobacillus pleuropneumoniae, Bordetella bronchiseptica, Glaesserella parasuis, Mesomycoplasma hyopneumoniae, Streptococcus suis	1	0.02
Actinobacillus pleuropneumoniae, Bordetella bronchiseptica, Glaesserella parasuis, Mesomycoplasma hyorhinis	1	0.02
Actinobacillus pleuropneumoniae, Bordetella bronchiseptica, Glaesserella parasuis, Mesomycoplasma hyorhinis, Pasteurella multocida	1	0.02
Actinobacillus pleuropneumoniae, Bordetella bronchiseptica, Glaesserella parasuis, PRRSV-1	1	0.02
Actinobacillus pleuropneumoniae, Bordetella bronchiseptica, Glaesserella parasuis, Pasteurella multocida, PRRSV-1	1	0.02
Actinobacillus pleuropneumoniae, Bordetella bronchiseptica, Mesomycoplasma hyopneumoniae	1	0.02
Actinobacillus pleuropneumoniae, Bordetella bronchiseptica, Mesomycoplasma hyopneumoniae, Mesomycoplasma hyorhinis, Pasteurella multocida, PRRSV-1, Streptococcus suis	1	0.02
Actinobacillus pleuropneumoniae, Bordetella bronchiseptica, Mesomycoplasma hyorhinis	1	0.02
Actinobacillus pleuropneumoniae, Bordetella bronchiseptica, Mesomycoplasma hyorhinis, Pasteurella multocida, PRRSV-1	1	0.02
Actinobacillus pleuropneumoniae, Bordetella bronchiseptica, Mesomycoplasma hyorhinis, Pasteurella multocida, PRRSV-1, Streptococcus suis	1	0.02
Actinobacillus pleuropneumoniae, Bordetella bronchiseptica, Pasteurella multocida	1	0.02
Actinobacillus pleuropneumoniae, Bordetella bronchiseptica, Pasteurella multocida, PRRSV-1	1	0.02
Actinobacillus pleuropneumoniae, Bordetella bronchiseptica, Pasteurella multocida, Streptococcus suis	1	0.02
Actinobacillus pleuropneumoniae, PCV2, PCV3, Glaesserella parasuis	1	0.02
Actinobacillus pleuropneumoniae, PCV2, PCV3, Glaesserella parasuis, IAV, Mesomycoplasma hyopneumoniae, Mesomycoplasma hyorhinis, PRRSV-1, Streptococcus suis	1	0.02
Actinobacillus pleuropneumoniae, PCV2, PCV3, Glaesserella parasuis, IAV, Mesomycoplasma hyorhinis, Pasteurella multocida, Streptococcus suis	1	0.02
Actinobacillus pleuropneumoniae, PCV2, PCV3, Glaesserella parasuis, IAV, PRRSV-1, Streptococcus suis	1	0.02
Actinobacillus pleuropneumoniae, PCV2, PCV3, Glaesserella parasuis, Mesomycoplasma hyopneumoniae, Mesomycoplasma hyorhinis	1	0.02
Actinobacillus pleuropneumoniae, PCV2, PCV3, Glaesserella parasuis, Mesomycoplasma hyopneumoniae, Mesomycoplasma hyorhinis, PRRSV-1	1	0.02
Actinobacillus pleuropneumoniae, PCV2, PCV3, Glaesserella parasuis, Mesomycoplasma hyopneumoniae, Mesomycoplasma hyorhinis, Pasteurella multocida	1	0.02
Actinobacillus pleuropneumoniae, PCV2, PCV3, Glaesserella parasuis, Mesomycoplasma hyopneumoniae, Mesomycoplasma hyorhinis, Streptococcus suis	1	0.02
Actinobacillus pleuropneumoniae, PCV2, PCV3, Glaesserella parasuis, Mesomycoplasma hyorhinis, PRRSV-1	1	0.02
Actinobacillus pleuropneumoniae, PCV2, PCV3, Glaesserella parasuis, Mesomycoplasma hyorhinis, Pasteurella multocida, PRRSV-1	1	0.02
Actinobacillus pleuropneumoniae, PCV2, PCV3, Glaesserella parasuis, Mesomycoplasma hyorhinis, Pasteurella multocida, PRRSV-1, PRRSV-2, Streptococcus suis	1	0.02
Actinobacillus pleuropneumoniae, PCV2, PCV3, Glaesserella parasuis, Mesomycoplasma hyorhinis, Pasteurella multocida, Streptococcus suis	1	0.02
Actinobacillus pleuropneumoniae, PCV2, PCV3, Glaesserella parasuis, Pasteurella multocida, PRRSV-1	1	0.02
Actinobacillus pleuropneumoniae, PCV2, PCV3, Glaesserella parasuis, Pasteurella multocida, PRRSV-2, Streptococcus suis	1	0.02
Actinobacillus pleuropneumoniae, PCV2, PCV3, IAV, Mesomycoplasma hyopneumoniae, Mesomycoplasma hyorhinis, Pasteurella multocida	1	0.02
Actinobacillus pleuropneumoniae, PCV2, PCV3, IAV, Mesomycoplasma hyopneumoniae, Pasteurella multocida, PRRSV-1	1	0.02
Actinobacillus pleuropneumoniae, PCV2, PCV3, IAV, Mesomycoplasma hyopneumoniae, Pasteurella multocida, Streptococcus suis	1	0.02
Actinobacillus pleuropneumoniae, PCV2, PCV3, IAV, PRRSV-1	1	0.02
Actinobacillus pleuropneumoniae, PCV2, PCV3, Mesomycoplasma hyopneumoniae	1	0.02
Actinobacillus pleuropneumoniae, PCV2, PCV3, Mesomycoplasma hyopneumoniae, Mesomycoplasma hyorhinis, PRRSV-1, Streptococcus suis	1	0.02
Actinobacillus pleuropneumoniae, PCV2, PCV3, Mesomycoplasma hyopneumoniae, Pasteurella multocida, PRRSV-1, Streptococcus suis	1	0.02
Actinobacillus pleuropneumoniae, PCV2, PCV3, Mesomycoplasma hyopneumoniae, Pasteurella multocida, Streptococcus suis	1	0.02
Actinobacillus pleuropneumoniae, PCV2, PCV3, Mesomycoplasma hyorhinis, PRRSV-1	1	0.02
Actinobacillus pleuropneumoniae, PCV2, PCV3, Mesomycoplasma hyorhinis, Pasteurella multocida, PRRSV-1, Streptococcus suis	1	0.02
Actinobacillus pleuropneumoniae, PCV2, PCV3, Mesomycoplasma hyorhinis, Streptococcus suis	1	0.02
Actinobacillus pleuropneumoniae, PCV2, Glaesserella parasuis, IAV, Mesomycoplasma hyopneumoniae, Mesomycoplasma hyorhinis, Pasteurella multocida, PRRSV-1	1	0.02
Actinobacillus pleuropneumoniae, PCV2, Glaesserella parasuis, IAV, Mesomycoplasma hyopneumoniae, Mesomycoplasma hyorhinis, Pasteurella multocida, Streptococcus suis	1	0.02
Actinobacillus pleuropneumoniae, PCV2, Glaesserella parasuis, IAV, Mesomycoplasma hyorhinis, PRRSV-1	1	0.02
Actinobacillus pleuropneumoniae, PCV2, Glaesserella parasuis, IAV, Pasteurella multocida	1	0.02
Actinobacillus pleuropneumoniae, PCV2, Glaesserella parasuis, IAV, Streptococcus suis	1	0.02
Actinobacillus pleuropneumoniae, PCV2, Glaesserella parasuis, Mesomycoplasma hyopneumoniae, Mesomycoplasma hyorhinis, Pasteurella multocida, PRRSV-1	1	0.02
Actinobacillus pleuropneumoniae, PCV2, Glaesserella parasuis, Mesomycoplasma hyopneumoniae, Pasteurella multocida, PRRSV-1	1	0.02
Actinobacillus pleuropneumoniae, PCV2, Glaesserella parasuis, Pasteurella multocida, PRRSV-1	1	0.02
Actinobacillus pleuropneumoniae, PCV2, IAV, Mesomycoplasma hyopneumoniae, Mesomycoplasma hyorhinis, Pasteurella multocida, Streptococcus suis	1	0.02
Actinobacillus pleuropneumoniae, PCV2, IAV, Mesomycoplasma hyopneumoniae, PRRSV-1, Streptococcus suis	1	0.02
Actinobacillus pleuropneumoniae, PCV2, IAV, Pasteurella multocida	1	0.02
Actinobacillus pleuropneumoniae, PCV2, IAV, Pasteurella multocida, Streptococcus suis	1	0.02
Actinobacillus pleuropneumoniae, PCV2, Mesomycoplasma hyopneumoniae, Mesomycoplasma hyorhinis	1	0.02
Actinobacillus pleuropneumoniae, PCV2, Mesomycoplasma hyopneumoniae, Mesomycoplasma hyorhinis, Pasteurella multocida, Streptococcus suis	1	0.02
Actinobacillus pleuropneumoniae, PCV2, Mesomycoplasma hyopneumoniae, Mesomycoplasma hyorhinis, Streptococcus suis	1	0.02
Actinobacillus pleuropneumoniae, PCV2, Mesomycoplasma hyorhinis, Pasteurella multocida, PRRSV-1	1	0.02
Actinobacillus pleuropneumoniae, PCV2, Mesomycoplasma hyorhinis, Pasteurella multocida, Streptococcus suis	1	0.02
Actinobacillus pleuropneumoniae, PCV2, PRRSV-2, Streptococcus suis	1	0.02
Actinobacillus pleuropneumoniae, PCV3, Glaesserella parasuis, IAV, Mesomycoplasma hyopneumoniae, Mesomycoplasma hyorhinis, Streptococcus suis	1	0.02
Actinobacillus pleuropneumoniae, PCV3, Glaesserella parasuis, IAV, Pasteurella multocida, PRRSV-1, Streptococcus suis	1	0.02
Actinobacillus pleuropneumoniae, PCV3, Glaesserella parasuis, Mesomycoplasma hyopneumoniae, Mesomycoplasma hyorhinis	1	0.02
Actinobacillus pleuropneumoniae, PCV3, Glaesserella parasuis, Mesomycoplasma hyopneumoniae, Streptococcus suis	1	0.02
Actinobacillus pleuropneumoniae, PCV3, Glaesserella parasuis, Mesomycoplasma hyorhinis, PRRSV-1	1	0.02
Actinobacillus pleuropneumoniae, PCV3, Glaesserella parasuis, Pasteurella multocida	1	0.02
Actinobacillus pleuropneumoniae, PCV3, IAV, Mesomycoplasma hyopneumoniae, Pasteurella multocida	1	0.02
Actinobacillus pleuropneumoniae, PCV3, IAV, Mesomycoplasma hyorhinis	1	0.02
Actinobacillus pleuropneumoniae, PCV3, Mesomycoplasma hyopneumoniae, Mesomycoplasma hyorhinis, PRRSV-1, Streptococcus suis	1	0.02
Actinobacillus pleuropneumoniae, PCV3, Mesomycoplasma hyopneumoniae, Mesomycoplasma hyorhinis, Pasteurella multocida, PRRSV-1, Streptococcus suis	1	0.02
Actinobacillus pleuropneumoniae, PCV3, Mesomycoplasma hyopneumoniae, PRRSV-1	1	0.02
Actinobacillus pleuropneumoniae, PCV3, Mesomycoplasma hyopneumoniae, Pasteurella multocida, PRRSV-1, Streptococcus suis	1	0.02
Actinobacillus pleuropneumoniae, PCV3, Mesomycoplasma hyopneumoniae, Streptococcus suis	1	0.02
Actinobacillus pleuropneumoniae, PCV3, Mesomycoplasma hyorhinis, Pasteurella multocida, PRRSV-1, Streptococcus suis	1	0.02
Actinobacillus pleuropneumoniae, PCV3, Pasteurella multocida, PRRSV-1	1	0.02
Actinobacillus pleuropneumoniae, Glaesserella parasuis, IAV, Mesomycoplasma hyopneumoniae, Mesomycoplasma hyorhinis, PRRSV-1	1	0.02
Actinobacillus pleuropneumoniae, Glaesserella parasuis, IAV, Mesomycoplasma hyopneumoniae, Mesomycoplasma hyorhinis, Pasteurella multocida, Streptococcus suis	1	0.02
Actinobacillus pleuropneumoniae, Glaesserella parasuis, IAV, Mesomycoplasma hyopneumoniae, Pasteurella multocida, PRRSV-1, Streptococcus suis	1	0.02
Actinobacillus pleuropneumoniae, Glaesserella parasuis, IAV, Mesomycoplasma hyopneumoniae, Streptococcus suis	1	0.02
Actinobacillus pleuropneumoniae, Glaesserella parasuis, IAV, Mesomycoplasma hyorhinis, PRRSV-1	1	0.02
Actinobacillus pleuropneumoniae, Glaesserella parasuis, IAV, PRRSV-1	1	0.02
Actinobacillus pleuropneumoniae, Glaesserella parasuis, IAV, Pasteurella multocida	1	0.02
Actinobacillus pleuropneumoniae, Glaesserella parasuis, IAV, Pasteurella multocida, Streptococcus suis	1	0.02
Actinobacillus pleuropneumoniae, Glaesserella parasuis, PRRSV-2	1	0.02
Actinobacillus pleuropneumoniae, Glaesserella parasuis, PRRSV-2, Streptococcus suis	1	0.02
Actinobacillus pleuropneumoniae, IAV, Mesomycoplasma hyopneumoniae	1	0.02
Actinobacillus pleuropneumoniae, IAV, Mesomycoplasma hyopneumoniae, Mesomycoplasma hyorhinis, Pasteurella multocida, Streptococcus suis	1	0.02
Actinobacillus pleuropneumoniae, IAV, Mesomycoplasma hyopneumoniae, PRRSV-1, Streptococcus suis	1	0.02
Actinobacillus pleuropneumoniae, IAV, Mesomycoplasma hyorhinis, PRRSV-1, Streptococcus suis	1	0.02
Actinobacillus pleuropneumoniae, IAV, Pasteurella multocida	1	0.02
Actinobacillus pleuropneumoniae, Mesomycoplasma hyopneumoniae, Mesomycoplasma hyorhinis	1	0.02
Actinobacillus pleuropneumoniae, Mesomycoplasma hyopneumoniae, PRRSV-2	1	0.02
Actinobacillus pleuropneumoniae, Mesomycoplasma hyorhinis, Pasteurella multocida, PRRSV-1	1	0.02
Actinobacillus pleuropneumoniae, Mesomycoplasma hyorhinis, Pasteurella multocida, Streptococcus suis	1	0.02
Actinobacillus suis, Actinobacillus pleuropneumoniae, Bordetella bronchiseptica, PCV2, PCV3, Glaesserella parasuis, IAV, Mesomycoplasma hyorhinis, Pasteurella multocida, PRRSV-1, Streptococcus suis	1	0.02
Actinobacillus suis, Actinobacillus pleuropneumoniae, Bordetella bronchiseptica, PCV2, PCV3, Glaesserella parasuis, Mesomycoplasma hyopneumoniae, Pasteurella multocida, PRRSV-1, Streptococcus suis	1	0.02
Actinobacillus suis, Actinobacillus pleuropneumoniae, Bordetella bronchiseptica, PCV2, PCV3, Glaesserella parasuis, Mesomycoplasma hyorhinis, Streptococcus suis	1	0.02
Actinobacillus suis, Actinobacillus pleuropneumoniae, Bordetella bronchiseptica, PCV2, PCV3, Mesomycoplasma hyorhinis, Pasteurella multocida	1	0.02
Actinobacillus suis, Actinobacillus pleuropneumoniae, Bordetella bronchiseptica, PCV2, Glaesserella parasuis, IAV, Mesomycoplasma hyopneumoniae, Mesomycoplasma hyorhinis, Pasteurella multocida, PRRSV-1	1	0.02
Actinobacillus suis, Actinobacillus pleuropneumoniae, Bordetella bronchiseptica, PCV2, Glaesserella parasuis, Mesomycoplasma hyopneumoniae, Mesomycoplasma hyorhinis, Streptococcus suis	1	0.02
Actinobacillus suis, Actinobacillus pleuropneumoniae, Bordetella bronchiseptica, PCV2, Glaesserella parasuis, Mesomycoplasma hyorhinis, PRRSV-1, Streptococcus suis	1	0.02
Actinobacillus suis, Actinobacillus pleuropneumoniae, Bordetella bronchiseptica, PCV2, Glaesserella parasuis, Mesomycoplasma hyorhinis, Pasteurella multocida, PRRSV-1, Streptococcus suis	1	0.02
Actinobacillus suis, Actinobacillus pleuropneumoniae, Bordetella bronchiseptica, PCV2, Glaesserella parasuis, Mesomycoplasma hyorhinis, Pasteurella multocida, Streptococcus suis	1	0.02
Actinobacillus suis, Actinobacillus pleuropneumoniae, Bordetella bronchiseptica, PCV2, Glaesserella parasuis, Mesomycoplasma hyorhinis, Streptococcus suis	1	0.02
Actinobacillus suis, Actinobacillus pleuropneumoniae, Bordetella bronchiseptica, PCV2, Glaesserella parasuis, Pasteurella multocida, PRRSV-1, Streptococcus suis	1	0.02
Actinobacillus suis, Actinobacillus pleuropneumoniae, Bordetella bronchiseptica, PCV2, Streptococcus suis	1	0.02
Actinobacillus suis, Actinobacillus pleuropneumoniae, Bordetella bronchiseptica, PCV3, Glaesserella parasuis, IAV, Mesomycoplasma hyorhinis, Pasteurella multocida, PRRSV-1, Streptococcus suis	1	0.02
Actinobacillus suis, Actinobacillus pleuropneumoniae, Bordetella bronchiseptica, PCV3, Glaesserella parasuis, Mesomycoplasma hyorhinis, Pasteurella multocida, PRRSV-1, Streptococcus suis	1	0.02
Actinobacillus suis, Actinobacillus pleuropneumoniae, Bordetella bronchiseptica, PCV3, Glaesserella parasuis, Mesomycoplasma hyorhinis, Pasteurella multocida, Streptococcus suis	1	0.02
Actinobacillus suis, Actinobacillus pleuropneumoniae, Bordetella bronchiseptica, PCV3, Glaesserella parasuis, Streptococcus suis	1	0.02
Actinobacillus suis, Actinobacillus pleuropneumoniae, Bordetella bronchiseptica, Glaesserella parasuis, IAV, Mesomycoplasma hyorhinis, PRRSV-1, Streptococcus suis	1	0.02
Actinobacillus suis, Actinobacillus pleuropneumoniae, Bordetella bronchiseptica, Glaesserella parasuis, IAV, Mesomycoplasma hyorhinis, Streptococcus suis	1	0.02
Actinobacillus suis, Actinobacillus pleuropneumoniae, Bordetella bronchiseptica, Glaesserella parasuis, Mesomycoplasma hyorhinis, Pasteurella multocida, Streptococcus suis	1	0.02
Actinobacillus suis, Actinobacillus pleuropneumoniae, Bordetella bronchiseptica, Mesomycoplasma hyorhinis, PRRSV-1	1	0.02
Actinobacillus suis, Actinobacillus pleuropneumoniae, Bordetella bronchiseptica, Mesomycoplasma hyorhinis, PRRSV-1, Streptococcus suis	1	0.02
Actinobacillus suis, Actinobacillus pleuropneumoniae, Bordetella bronchiseptica, Mesomycoplasma hyorhinis, Streptococcus suis	1	0.02
Actinobacillus suis, Actinobacillus pleuropneumoniae, PCV2, PCV3, Glaesserella parasuis, Mesomycoplasma hyopneumoniae, Mesomycoplasma hyorhinis, Pasteurella multocida, PRRSV-1, Streptococcus suis	1	0.02
Actinobacillus suis, Actinobacillus pleuropneumoniae, PCV2, PCV3, Glaesserella parasuis, Mesomycoplasma hyorhinis	1	0.02
Actinobacillus suis, Actinobacillus pleuropneumoniae, PCV2, PCV3, Glaesserella parasuis, Pasteurella multocida, Streptococcus suis	1	0.02
Actinobacillus suis, Actinobacillus pleuropneumoniae, PCV2, PCV3, Mesomycoplasma hyopneumoniae, PRRSV-1	1	0.02
Actinobacillus suis, Actinobacillus pleuropneumoniae, PCV2, PCV3, Mesomycoplasma hyopneumoniae, Pasteurella multocida, PRRSV-1, Streptococcus suis	1	0.02
Actinobacillus suis, Actinobacillus pleuropneumoniae, PCV2, Glaesserella parasuis	1	0.02
Actinobacillus suis, Actinobacillus pleuropneumoniae, PCV2, Glaesserella parasuis, IAV, Mesomycoplasma hyopneumoniae, Mesomycoplasma hyorhinis, Pasteurella multocida, PRRSV-1, Streptococcus suis	1	0.02
Actinobacillus suis, Actinobacillus pleuropneumoniae, PCV2, Glaesserella parasuis, IAV, Mesomycoplasma hyorhinis, Pasteurella multocida, Streptococcus suis	1	0.02
Actinobacillus suis, Actinobacillus pleuropneumoniae, PCV2, Glaesserella parasuis, IAV, PRRSV-1	1	0.02
Actinobacillus suis, Actinobacillus pleuropneumoniae, PCV2, Glaesserella parasuis, Mesomycoplasma hyopneumoniae, Mesomycoplasma hyorhinis, PRRSV-1, Streptococcus suis	1	0.02
Actinobacillus suis, Actinobacillus pleuropneumoniae, PCV2, Glaesserella parasuis, Mesomycoplasma hyopneumoniae, Mesomycoplasma hyorhinis, Pasteurella multocida, Streptococcus suis	1	0.02
Actinobacillus suis, Actinobacillus pleuropneumoniae, PCV2, Glaesserella parasuis, Mesomycoplasma hyorhinis, PRRSV-1, Streptococcus suis	1	0.02
Actinobacillus suis, Actinobacillus pleuropneumoniae, PCV2, Glaesserella parasuis, Mesomycoplasma hyorhinis, Pasteurella multocida, Streptococcus suis	1	0.02
Actinobacillus suis, Actinobacillus pleuropneumoniae, PCV2, Glaesserella parasuis, PRRSV-1	1	0.02
Actinobacillus suis, Actinobacillus pleuropneumoniae, PCV2, Glaesserella parasuis, Pasteurella multocida, Streptococcus suis	1	0.02
Actinobacillus suis, Actinobacillus pleuropneumoniae, PCV2, Glaesserella parasuis, Streptococcus suis	1	0.02
Actinobacillus suis, Actinobacillus pleuropneumoniae, PCV2, Mesomycoplasma hyopneumoniae, Mesomycoplasma hyorhinis, PRRSV-1, Streptococcus suis	1	0.02
Actinobacillus suis, Actinobacillus pleuropneumoniae, PCV2, Mesomycoplasma hyorhinis, PRRSV-1, Streptococcus suis	1	0.02
Actinobacillus suis, Actinobacillus pleuropneumoniae, PCV2, Mesomycoplasma hyorhinis, Pasteurella multocida	1	0.02
Actinobacillus suis, Actinobacillus pleuropneumoniae, PCV2, Mesomycoplasma hyorhinis, Streptococcus suis	1	0.02
Actinobacillus suis, Actinobacillus pleuropneumoniae, PCV2, PRRSV-1	1	0.02
Actinobacillus suis, Actinobacillus pleuropneumoniae, PCV2, Pasteurella multocida	1	0.02
Actinobacillus suis, Actinobacillus pleuropneumoniae, PCV3, Glaesserella parasuis, IAV, Mesomycoplasma hyorhinis, Pasteurella multocida, PRRSV-1, Streptococcus suis	1	0.02
Actinobacillus suis, Actinobacillus pleuropneumoniae, PCV3, Glaesserella parasuis, IAV, Mesomycoplasma hyorhinis, Pasteurella multocida, Streptococcus suis	1	0.02
Actinobacillus suis, Actinobacillus pleuropneumoniae, PCV3, Glaesserella parasuis, Mesomycoplasma hyorhinis, Pasteurella multocida, Streptococcus suis	1	0.02
Actinobacillus suis, Actinobacillus pleuropneumoniae, PCV3, Glaesserella parasuis, Pasteurella multocida, PRRSV-1	1	0.02
Actinobacillus suis, Actinobacillus pleuropneumoniae, PCV3, Glaesserella parasuis, Streptococcus suis	1	0.02
Actinobacillus suis, Actinobacillus pleuropneumoniae, PCV3, PRRSV-1	1	0.02
Actinobacillus suis, Actinobacillus pleuropneumoniae, Glaesserella parasuis, IAV, Mesomycoplasma hyopneumoniae, Pasteurella multocida, Streptococcus suis	1	0.02
Actinobacillus suis, Actinobacillus pleuropneumoniae, Glaesserella parasuis, IAV, Mesomycoplasma hyorhinis, PRRSV-1, Streptococcus suis	1	0.02
Actinobacillus suis, Actinobacillus pleuropneumoniae, Glaesserella parasuis, IAV, Mesomycoplasma hyorhinis, Pasteurella multocida, Streptococcus suis	1	0.02
Actinobacillus suis, Actinobacillus pleuropneumoniae, Glaesserella parasuis, IAV, Pasteurella multocida	1	0.02
Actinobacillus suis, Actinobacillus pleuropneumoniae, Glaesserella parasuis, IAV, Pasteurella multocida, PRRSV-1, Streptococcus suis	1	0.02
Actinobacillus suis, Actinobacillus pleuropneumoniae, Glaesserella parasuis, Mesomycoplasma hyopneumoniae, Mesomycoplasma hyorhinis, Pasteurella multocida, Streptococcus suis	1	0.02
Actinobacillus suis, Actinobacillus pleuropneumoniae, Glaesserella parasuis, Mesomycoplasma hyopneumoniae, PRRSV-1, Streptococcus suis	1	0.02
Actinobacillus suis, Actinobacillus pleuropneumoniae, Glaesserella parasuis, PRRSV-1	1	0.02
Actinobacillus suis, Actinobacillus pleuropneumoniae, Glaesserella parasuis, PRRSV-1, Streptococcus suis	1	0.02
Actinobacillus suis, Actinobacillus pleuropneumoniae, IAV, Mesomycoplasma hyopneumoniae, Mesomycoplasma hyorhinis	1	0.02
Actinobacillus suis, Actinobacillus pleuropneumoniae, IAV, PRRSV-1, Streptococcus suis	1	0.02
Actinobacillus suis, Actinobacillus pleuropneumoniae, Mesomycoplasma hyorhinis	1	0.02
Actinobacillus suis, Actinobacillus pleuropneumoniae, Mesomycoplasma hyorhinis, Pasteurella multocida	1	0.02
Actinobacillus suis, Actinobacillus pleuropneumoniae, Mesomycoplasma hyorhinis, Pasteurella multocida, PRRSV-1, Streptococcus suis	1	0.02
Actinobacillus suis, Actinobacillus pleuropneumoniae, PRRSV-1	1	0.02
Actinobacillus suis, Actinobacillus pleuropneumoniae, PRRSV-1, Streptococcus suis	1	0.02
Actinobacillus suis, Bordetella bronchiseptica	1	0.02
Actinobacillus suis, Bordetella bronchiseptica, PCV2, Glaesserella parasuis, IAV, Mesomycoplasma hyopneumoniae, Mesomycoplasma hyorhinis, Pasteurella multocida, PRRSV-1, Streptococcus suis	1	0.02
Actinobacillus suis, Bordetella bronchiseptica, PCV2, Glaesserella parasuis, Mesomycoplasma hyopneumoniae, Mesomycoplasma hyorhinis, PRRSV-1, Streptococcus suis	1	0.02
Actinobacillus suis, Bordetella bronchiseptica, PCV2, Glaesserella parasuis, Mesomycoplasma hyopneumoniae, Mesomycoplasma hyorhinis, Pasteurella multocida, PRRSV-1, Streptococcus suis	1	0.02
Actinobacillus suis, Bordetella bronchiseptica, PCV2, Glaesserella parasuis, Mesomycoplasma hyopneumoniae, Streptococcus suis	1	0.02
Actinobacillus suis, Bordetella bronchiseptica, PCV2, Glaesserella parasuis, Mesomycoplasma hyorhinis	1	0.02
Actinobacillus suis, Bordetella bronchiseptica, PCV2, Glaesserella parasuis, Mesomycoplasma hyorhinis, Pasteurella multocida, PRRSV-1, Streptococcus suis	1	0.02
Actinobacillus suis, Bordetella bronchiseptica, PCV2, Glaesserella parasuis, Pasteurella multocida, PRRSV-1, Streptococcus suis	1	0.02
Actinobacillus suis, Bordetella bronchiseptica, PCV2, Mesomycoplasma hyopneumoniae, Mesomycoplasma hyorhinis, Pasteurella multocida, Streptococcus suis	1	0.02
Actinobacillus suis, Bordetella bronchiseptica, PCV2, Streptococcus suis	1	0.02
Actinobacillus suis, Bordetella bronchiseptica, PCV3, Glaesserella parasuis, IAV, Mesomycoplasma hyopneumoniae, Mesomycoplasma hyorhinis, Pasteurella multocida, PRRSV-1, Streptococcus suis	1	0.02
Actinobacillus suis, Bordetella bronchiseptica, PCV3, Glaesserella parasuis, Mesomycoplasma hyopneumoniae, Mesomycoplasma hyorhinis, PRRSV-1	1	0.02
Actinobacillus suis, Bordetella bronchiseptica, PCV3, Glaesserella parasuis, Mesomycoplasma hyorhinis, PRRSV-1, Streptococcus suis	1	0.02
Actinobacillus suis, Bordetella bronchiseptica, PCV3, Glaesserella parasuis, Mesomycoplasma hyorhinis, Pasteurella multocida, PRRSV-1, Streptococcus suis	1	0.02
Actinobacillus suis, Bordetella bronchiseptica, PCV3, Glaesserella parasuis, Mesomycoplasma hyorhinis, Pasteurella multocida, Streptococcus suis	1	0.02
Actinobacillus suis, Bordetella bronchiseptica, PCV3, Glaesserella parasuis, Mesomycoplasma hyorhinis, Streptococcus suis	1	0.02
Actinobacillus suis, Bordetella bronchiseptica, PCV3, Glaesserella parasuis, PRRSV-1, Streptococcus suis	1	0.02
Actinobacillus suis, Bordetella bronchiseptica, Glaesserella parasuis, IAV, Mesomycoplasma hyopneumoniae, Mesomycoplasma hyorhinis, Pasteurella multocida, PRRSV-1, Streptococcus suis	1	0.02
Actinobacillus suis, Bordetella bronchiseptica, Glaesserella parasuis, IAV, Mesomycoplasma hyorhinis, Streptococcus suis	1	0.02
Actinobacillus suis, Bordetella bronchiseptica, Glaesserella parasuis, Mesomycoplasma hyopneumoniae, Mesomycoplasma hyorhinis, Pasteurella multocida, PRRSV-1, Streptococcus suis	1	0.02
Actinobacillus suis, Bordetella bronchiseptica, Glaesserella parasuis, Mesomycoplasma hyopneumoniae, Mesomycoplasma hyorhinis, Streptococcus suis	1	0.02
Actinobacillus suis, Bordetella bronchiseptica, Glaesserella parasuis, Mesomycoplasma hyopneumoniae, Pasteurella multocida, Streptococcus suis	1	0.02
Actinobacillus suis, Bordetella bronchiseptica, Glaesserella parasuis, Mesomycoplasma hyorhinis, PRRSV-1, Streptococcus suis	1	0.02
Actinobacillus suis, Bordetella bronchiseptica, Glaesserella parasuis, Mesomycoplasma hyorhinis, Streptococcus suis	1	0.02
Actinobacillus suis, Bordetella bronchiseptica, Mesomycoplasma hyorhinis	1	0.02
Actinobacillus suis, Bordetella bronchiseptica, Mesomycoplasma hyorhinis, PRRSV-1	1	0.02
Actinobacillus suis, Bordetella bronchiseptica, PRRSV-1	1	0.02
Actinobacillus suis, Bordetella bronchiseptica, Pasteurella multocida, Streptococcus suis	1	0.02
Actinobacillus suis, PCV2, PCV3	1	0.02
Actinobacillus suis, PCV2, PCV3, Glaesserella parasuis, IAV, Mesomycoplasma hyorhinis, Streptococcus suis	1	0.02
Actinobacillus suis, PCV2, PCV3, Glaesserella parasuis, Mesomycoplasma hyopneumoniae, Mesomycoplasma hyorhinis, Pasteurella multocida, PRRSV-1, Streptococcus suis	1	0.02
Actinobacillus suis, PCV2, PCV3, Glaesserella parasuis, Mesomycoplasma hyopneumoniae, Mesomycoplasma hyorhinis, Pasteurella multocida, Streptococcus suis	1	0.02
Actinobacillus suis, PCV2, PCV3, Glaesserella parasuis, Mesomycoplasma hyopneumoniae, Pasteurella multocida, PRRSV-1, Streptococcus suis	1	0.02
Actinobacillus suis, PCV2, PCV3, Glaesserella parasuis, Mesomycoplasma hyorhinis, Pasteurella multocida, Streptococcus suis	1	0.02
Actinobacillus suis, PCV2, PCV3, Mesomycoplasma hyopneumoniae	1	0.02
Actinobacillus suis, PCV2, PCV3, Mesomycoplasma hyorhinis, PRRSV-1	1	0.02
Actinobacillus suis, PCV2, Glaesserella parasuis	1	0.02
Actinobacillus suis, PCV2, Glaesserella parasuis, IAV, Mesomycoplasma hyopneumoniae, Mesomycoplasma hyorhinis, Pasteurella multocida, PRRSV-1	1	0.02
Actinobacillus suis, PCV2, Glaesserella parasuis, IAV, Mesomycoplasma hyorhinis, PRRSV-1, Streptococcus suis	1	0.02
Actinobacillus suis, PCV2, Glaesserella parasuis, IAV, Mesomycoplasma hyorhinis, Pasteurella multocida, PRRSV-1	1	0.02
Actinobacillus suis, PCV2, Glaesserella parasuis, IAV, Mesomycoplasma hyorhinis, Pasteurella multocida, Streptococcus suis	1	0.02
Actinobacillus suis, PCV2, Glaesserella parasuis, IAV, PRRSV-1	1	0.02
Actinobacillus suis, PCV2, Glaesserella parasuis, Mesomycoplasma hyopneumoniae, Pasteurella multocida, PRRSV-1	1	0.02
Actinobacillus suis, PCV2, Glaesserella parasuis, Mesomycoplasma hyopneumoniae, Pasteurella multocida, PRRSV-1, Streptococcus suis	1	0.02
Actinobacillus suis, PCV2, Glaesserella parasuis, Mesomycoplasma hyorhinis, Streptococcus suis	1	0.02
Actinobacillus suis, PCV2, IAV, Mesomycoplasma hyopneumoniae	1	0.02
Actinobacillus suis, PCV2, IAV, Mesomycoplasma hyorhinis, Streptococcus suis	1	0.02
Actinobacillus suis, PCV2, Mesomycoplasma hyopneumoniae, Mesomycoplasma hyorhinis, PRRSV-1, Streptococcus suis	1	0.02
Actinobacillus suis, PCV2, Mesomycoplasma hyopneumoniae, Mesomycoplasma hyorhinis, Pasteurella multocida, PRRSV-1, Streptococcus suis	1	0.02
Actinobacillus suis, PCV2, Mesomycoplasma hyopneumoniae, PRRSV-1	1	0.02
Actinobacillus suis, PCV2, Mesomycoplasma hyopneumoniae, PRRSV-1, Streptococcus suis	1	0.02
Actinobacillus suis, PCV2, Mesomycoplasma hyopneumoniae, Pasteurella multocida, Streptococcus suis	1	0.02
Actinobacillus suis, PCV2, Mesomycoplasma hyorhinis	1	0.02
Actinobacillus suis, PCV2, Mesomycoplasma hyorhinis, PRRSV-1, Streptococcus suis	1	0.02
Actinobacillus suis, PCV2, Mesomycoplasma hyorhinis, Pasteurella multocida, Streptococcus suis	1	0.02
Actinobacillus suis, PCV2, PRRSV-1	1	0.02
Actinobacillus suis, PCV2, PRRSV-2	1	0.02
Actinobacillus suis, PCV2, Pasteurella multocida, Streptococcus suis	1	0.02
Actinobacillus suis, PCV3	1	0.02
Actinobacillus suis, PCV3, Glaesserella parasuis	1	0.02
Actinobacillus suis, PCV3, Glaesserella parasuis, IAV, Mesomycoplasma hyorhinis, PRRSV-1, Streptococcus suis	1	0.02
Actinobacillus suis, PCV3, Glaesserella parasuis, Mesomycoplasma hyorhinis, Pasteurella multocida, PRRSV-1	1	0.02
Actinobacillus suis, PCV3, Glaesserella parasuis, Pasteurella multocida, Streptococcus suis	1	0.02
Actinobacillus suis, PCV3, IAV	1	0.02
Actinobacillus suis, PCV3, Mesomycoplasma hyorhinis, PRRSV-1	1	0.02
Actinobacillus suis, PCV3, Pasteurella multocida, Streptococcus suis	1	0.02
Actinobacillus suis, Glaesserella parasuis, IAV, Mesomycoplasma hyopneumoniae, Mesomycoplasma hyorhinis, Pasteurella multocida, Streptococcus suis	1	0.02
Actinobacillus suis, Glaesserella parasuis, IAV, Mesomycoplasma hyopneumoniae, Mesomycoplasma hyorhinis, Streptococcus suis	1	0.02
Actinobacillus suis, Glaesserella parasuis, IAV, Mesomycoplasma hyopneumoniae, Pasteurella multocida, PRRSV-1, Streptococcus suis	1	0.02
Actinobacillus suis, Glaesserella parasuis, IAV, Mesomycoplasma hyopneumoniae, Pasteurella multocida, Streptococcus suis	1	0.02
Actinobacillus suis, Glaesserella parasuis, IAV, Mesomycoplasma hyopneumoniae, Streptococcus suis	1	0.02
Actinobacillus suis, Glaesserella parasuis, IAV, Mesomycoplasma hyorhinis, PRRSV-1	1	0.02
Actinobacillus suis, Glaesserella parasuis, IAV, Mesomycoplasma hyorhinis, Pasteurella multocida, Streptococcus suis	1	0.02
Actinobacillus suis, Glaesserella parasuis, IAV, PRRSV-1	1	0.02
Actinobacillus suis, Glaesserella parasuis, IAV, Pasteurella multocida, Streptococcus suis	1	0.02
Actinobacillus suis, Glaesserella parasuis, IAV, Streptococcus suis	1	0.02
Actinobacillus suis, Glaesserella parasuis, Mesomycoplasma hyopneumoniae	1	0.02
Actinobacillus suis, Glaesserella parasuis, Mesomycoplasma hyopneumoniae, Mesomycoplasma hyorhinis, PRRSV-1, Streptococcus suis	1	0.02
Actinobacillus suis, Glaesserella parasuis, Mesomycoplasma hyopneumoniae, Mesomycoplasma hyorhinis, Pasteurella multocida, PRRSV-1	1	0.02
Actinobacillus suis, Glaesserella parasuis, Mesomycoplasma hyopneumoniae, Mesomycoplasma hyorhinis, Streptococcus suis	1	0.02
Actinobacillus suis, Glaesserella parasuis, Mesomycoplasma hyopneumoniae, Pasteurella multocida	1	0.02
Actinobacillus suis, Glaesserella parasuis, Mesomycoplasma hyopneumoniae, Pasteurella multocida, Streptococcus suis	1	0.02
Actinobacillus suis, Glaesserella parasuis, Mesomycoplasma hyorhinis, PRRSV-1	1	0.02
Actinobacillus suis, Glaesserella parasuis, Mesomycoplasma hyorhinis, Pasteurella multocida, PRRSV-1	1	0.02
Actinobacillus suis, Glaesserella parasuis, Pasteurella multocida	1	0.02
Actinobacillus suis, IAV, Pasteurella multocida	1	0.02
Actinobacillus suis, IAV, Streptococcus suis	1	0.02
Actinobacillus suis, Mesomycoplasma hyopneumoniae	1	0.02
Actinobacillus suis, Mesomycoplasma hyopneumoniae, Mesomycoplasma hyorhinis, PRRSV-1	1	0.02
Actinobacillus suis, Mesomycoplasma hyopneumoniae, PRRSV-1	1	0.02
Actinobacillus suis, Mesomycoplasma hyopneumoniae, Pasteurella multocida, Streptococcus suis	1	0.02
Actinobacillus suis, Mesomycoplasma hyopneumoniae, Streptococcus suis	1	0.02
Actinobacillus suis, Pasteurella multocida, PRRSV-1, Streptococcus suis	1	0.02
Bordetella bronchiseptica, PCV2, PCV3, Glaesserella parasuis, IAV, Mesomycoplasma hyopneumoniae, Mesomycoplasma hyorhinis, PRRSV-1, Streptococcus suis	1	0.02
Bordetella bronchiseptica, PCV2, PCV3, Glaesserella parasuis, IAV, Mesomycoplasma hyopneumoniae, Mesomycoplasma hyorhinis, Pasteurella multocida, PRRSV-1, Streptococcus suis	1	0.02
Bordetella bronchiseptica, PCV2, PCV3, Glaesserella parasuis, IAV, Mesomycoplasma hyorhinis, PRRSV-1	1	0.02
Bordetella bronchiseptica, PCV2, PCV3, Glaesserella parasuis, IAV, Mesomycoplasma hyorhinis, Pasteurella multocida, PRRSV-1, Streptococcus suis	1	0.02
Bordetella bronchiseptica, PCV2, PCV3, Glaesserella parasuis, Mesomycoplasma hyopneumoniae, Mesomycoplasma hyorhinis, Pasteurella multocida, Streptococcus suis	1	0.02
Bordetella bronchiseptica, PCV2, PCV3, Glaesserella parasuis, Mesomycoplasma hyorhinis, Pasteurella multocida, PRRSV-1	1	0.02
Bordetella bronchiseptica, PCV2, PCV3, Glaesserella parasuis, Mesomycoplasma hyorhinis, Pasteurella multocida, Streptococcus suis	1	0.02
Bordetella bronchiseptica, PCV2, PCV3, IAV, Mesomycoplasma hyorhinis, PRRSV-1, Streptococcus suis	1	0.02
Bordetella bronchiseptica, PCV2, PCV3, Mesomycoplasma hyopneumoniae, Mesomycoplasma hyorhinis, Pasteurella multocida, PRRSV-1, Streptococcus suis	1	0.02
Bordetella bronchiseptica, PCV2, PCV3, Mesomycoplasma hyopneumoniae, Pasteurella multocida, PRRSV-1, Streptococcus suis	1	0.02
Bordetella bronchiseptica, PCV2, PCV3, Mesomycoplasma hyorhinis	1	0.02
Bordetella bronchiseptica, PCV2, PCV3, Mesomycoplasma hyorhinis, PRRSV-1, Streptococcus suis	1	0.02
Bordetella bronchiseptica, PCV2, PCV3, Mesomycoplasma hyorhinis, Pasteurella multocida, PRRSV-1, Streptococcus suis	1	0.02
Bordetella bronchiseptica, PCV2, PCV3, PRRSV-1	1	0.02
Bordetella bronchiseptica, PCV2, PCV3, Pasteurella multocida, PRRSV-1, Streptococcus suis	1	0.02
Bordetella bronchiseptica, PCV2, PCV3, Streptococcus suis	1	0.02
Bordetella bronchiseptica, PCV2, Glaesserella parasuis, IAV, Mesomycoplasma hyopneumoniae, Mesomycoplasma hyorhinis, PRRSV-1	1	0.02
Bordetella bronchiseptica, PCV2, Glaesserella parasuis, IAV, Mesomycoplasma hyopneumoniae, PRRSV-1, Streptococcus suis	1	0.02
Bordetella bronchiseptica, PCV2, Glaesserella parasuis, IAV, Mesomycoplasma hyorhinis	1	0.02
Bordetella bronchiseptica, PCV2, Glaesserella parasuis, IAV, Mesomycoplasma hyorhinis, Pasteurella multocida	1	0.02
Bordetella bronchiseptica, PCV2, Glaesserella parasuis, IAV, Mesomycoplasma hyorhinis, Streptococcus suis	1	0.02
Bordetella bronchiseptica, PCV2, Glaesserella parasuis, IAV, Pasteurella multocida, PRRSV-1, Streptococcus suis	1	0.02
Bordetella bronchiseptica, PCV2, Glaesserella parasuis, IAV, Pasteurella multocida, Streptococcus suis	1	0.02
Bordetella bronchiseptica, PCV2, Glaesserella parasuis, Mesomycoplasma hyopneumoniae, Mesomycoplasma hyorhinis	1	0.02
Bordetella bronchiseptica, PCV2, Glaesserella parasuis, Mesomycoplasma hyopneumoniae, Mesomycoplasma hyorhinis, PRRSV-1	1	0.02
Bordetella bronchiseptica, PCV2, Glaesserella parasuis, Mesomycoplasma hyopneumoniae, Mesomycoplasma hyorhinis, PRRSV-1, Streptococcus suis	1	0.02
Bordetella bronchiseptica, PCV2, Glaesserella parasuis, Mesomycoplasma hyopneumoniae, Mesomycoplasma hyorhinis, Pasteurella multocida, PRRSV-2, Streptococcus suis	1	0.02
Bordetella bronchiseptica, PCV2, Glaesserella parasuis, Mesomycoplasma hyopneumoniae, Mesomycoplasma hyorhinis, Streptococcus suis	1	0.02
Bordetella bronchiseptica, PCV2, Glaesserella parasuis, Mesomycoplasma hyorhinis, Pasteurella multocida	1	0.02
Bordetella bronchiseptica, PCV2, Glaesserella parasuis, Pasteurella multocida, PRRSV-1	1	0.02
Bordetella bronchiseptica, PCV2, Glaesserella parasuis, Pasteurella multocida, PRRSV-1, Streptococcus suis	1	0.02
Bordetella bronchiseptica, PCV2, Glaesserella parasuis, Streptococcus suis	1	0.02
Bordetella bronchiseptica, PCV2, IAV, Mesomycoplasma hyopneumoniae, Mesomycoplasma hyorhinis, Pasteurella multocida, PRRSV-1	1	0.02
Bordetella bronchiseptica, PCV2, IAV, Mesomycoplasma hyopneumoniae, Pasteurella multocida, PRRSV-1, Streptococcus suis	1	0.02
Bordetella bronchiseptica, PCV2, Mesomycoplasma hyopneumoniae	1	0.02
Bordetella bronchiseptica, PCV2, Mesomycoplasma hyopneumoniae, Mesomycoplasma hyorhinis	1	0.02
Bordetella bronchiseptica, PCV2, Mesomycoplasma hyopneumoniae, Mesomycoplasma hyorhinis, PRRSV-1, Streptococcus suis	1	0.02
Bordetella bronchiseptica, PCV2, Mesomycoplasma hyopneumoniae, Mesomycoplasma hyorhinis, Pasteurella multocida	1	0.02
Bordetella bronchiseptica, PCV2, Mesomycoplasma hyopneumoniae, PRRSV-1	1	0.02
Bordetella bronchiseptica, PCV2, Mesomycoplasma hyorhinis	1	0.02
Bordetella bronchiseptica, PCV2, Mesomycoplasma hyorhinis, Pasteurella multocida, PRRSV-1, Streptococcus suis	1	0.02
Bordetella bronchiseptica, PCV2, Pasteurella multocida	1	0.02
Bordetella bronchiseptica, PCV3, Glaesserella parasuis, IAV	1	0.02
Bordetella bronchiseptica, PCV3, Glaesserella parasuis, IAV, Mesomycoplasma hyopneumoniae, PRRSV-1, Streptococcus suis	1	0.02
Bordetella bronchiseptica, PCV3, Glaesserella parasuis, IAV, Mesomycoplasma hyorhinis, Pasteurella multocida, Streptococcus suis	1	0.02
Bordetella bronchiseptica, PCV3, Glaesserella parasuis, IAV, PRRSV-1, Streptococcus suis	1	0.02
Bordetella bronchiseptica, PCV3, Glaesserella parasuis, IAV, Streptococcus suis	1	0.02
Bordetella bronchiseptica, PCV3, Glaesserella parasuis, Mesomycoplasma hyopneumoniae	1	0.02
Bordetella bronchiseptica, PCV3, Glaesserella parasuis, Mesomycoplasma hyopneumoniae, Mesomycoplasma hyorhinis, PRRSV-1	1	0.02
Bordetella bronchiseptica, PCV3, Glaesserella parasuis, Mesomycoplasma hyopneumoniae, Mesomycoplasma hyorhinis, PRRSV-1, Streptococcus suis	1	0.02
Bordetella bronchiseptica, PCV3, Glaesserella parasuis, Mesomycoplasma hyopneumoniae, Mesomycoplasma hyorhinis, Streptococcus suis	1	0.02
Bordetella bronchiseptica, PCV3, Glaesserella parasuis, Mesomycoplasma hyopneumoniae, Pasteurella multocida, Streptococcus suis	1	0.02
Bordetella bronchiseptica, PCV3, Glaesserella parasuis, Mesomycoplasma hyorhinis, Streptococcus suis	1	0.02
Bordetella bronchiseptica, PCV3, Glaesserella parasuis, Pasteurella multocida, PRRSV-1, Streptococcus suis	1	0.02
Bordetella bronchiseptica, PCV3, Glaesserella parasuis, Streptococcus suis	1	0.02
Bordetella bronchiseptica, PCV3, IAV, Pasteurella multocida, Streptococcus suis	1	0.02
Bordetella bronchiseptica, PCV3, Mesomycoplasma hyopneumoniae, Mesomycoplasma hyorhinis	1	0.02
Bordetella bronchiseptica, PCV3, Mesomycoplasma hyopneumoniae, Mesomycoplasma hyorhinis, Streptococcus suis	1	0.02
Bordetella bronchiseptica, PCV3, Mesomycoplasma hyorhinis, Pasteurella multocida, Streptococcus suis	1	0.02
Bordetella bronchiseptica, PCV3, PRRSV-1	1	0.02
Bordetella bronchiseptica, Glaesserella parasuis, IAV, Mesomycoplasma hyopneumoniae, Mesomycoplasma hyorhinis, Pasteurella multocida, Streptococcus suis	1	0.02
Bordetella bronchiseptica, Glaesserella parasuis, IAV, Mesomycoplasma hyorhinis	1	0.02
Bordetella bronchiseptica, Glaesserella parasuis, IAV, Mesomycoplasma hyorhinis, Pasteurella multocida	1	0.02
Bordetella bronchiseptica, Glaesserella parasuis, IAV, Mesomycoplasma hyorhinis, Pasteurella multocida, PRRSV-1	1	0.02
Bordetella bronchiseptica, Glaesserella parasuis, IAV, Pasteurella multocida, PRRSV-1, Streptococcus suis	1	0.02
Bordetella bronchiseptica, Glaesserella parasuis, IAV, Pasteurella multocida, Streptococcus suis	1	0.02
Bordetella bronchiseptica, Glaesserella parasuis, Mesomycoplasma hyopneumoniae, Mesomycoplasma hyorhinis, Pasteurella multocida	1	0.02
Bordetella bronchiseptica, Glaesserella parasuis, Mesomycoplasma hyopneumoniae, Mesomycoplasma hyorhinis, Pasteurella multocida, PRRSV-1	1	0.02
Bordetella bronchiseptica, Glaesserella parasuis, Mesomycoplasma hyopneumoniae, PRRSV-1, Streptococcus suis	1	0.02
Bordetella bronchiseptica, Glaesserella parasuis, Mesomycoplasma hyopneumoniae, Pasteurella multocida, PRRSV-1, Streptococcus suis	1	0.02
Bordetella bronchiseptica, Glaesserella parasuis, Mesomycoplasma hyopneumoniae, Streptococcus suis	1	0.02
Bordetella bronchiseptica, Glaesserella parasuis, Mesomycoplasma hyorhinis, Pasteurella multocida	1	0.02
Bordetella bronchiseptica, Glaesserella parasuis, Pasteurella multocida, PRRSV-1	1	0.02
Bordetella bronchiseptica, Glaesserella parasuis, Pasteurella multocida, PRRSV-1, Streptococcus suis	1	0.02
Bordetella bronchiseptica, IAV	1	0.02
Bordetella bronchiseptica, IAV, Mesomycoplasma hyopneumoniae, Mesomycoplasma hyorhinis, PRRSV-1, Streptococcus suis	1	0.02
Bordetella bronchiseptica, IAV, Mesomycoplasma hyopneumoniae, Pasteurella multocida, Streptococcus suis	1	0.02
Bordetella bronchiseptica, IAV, Mesomycoplasma hyorhinis	1	0.02
Bordetella bronchiseptica, IAV, Mesomycoplasma hyorhinis, Pasteurella multocida, Streptococcus suis	1	0.02
Bordetella bronchiseptica, Mesomycoplasma hyopneumoniae	1	0.02
Bordetella bronchiseptica, Mesomycoplasma hyopneumoniae, Mesomycoplasma hyorhinis, Pasteurella multocida, PRRSV-1, Streptococcus suis	1	0.02
Bordetella bronchiseptica, Mesomycoplasma hyopneumoniae, Mesomycoplasma hyorhinis, Streptococcus suis	1	0.02
Bordetella bronchiseptica, Mesomycoplasma hyopneumoniae, PRRSV-1	1	0.02
Bordetella bronchiseptica, Mesomycoplasma hyorhinis, Pasteurella multocida	1	0.02
Bordetella bronchiseptica, Mesomycoplasma hyorhinis, Pasteurella multocida, PRRSV-1	1	0.02
Bordetella bronchiseptica, Mesomycoplasma hyorhinis, Pasteurella multocida, Streptococcus suis	1	0.02
Bordetella bronchiseptica, Pasteurella multocida	1	0.02
Bordetella bronchiseptica, Pasteurella multocida, PRRSV-1	1	0.02
PCV2, PCV3, Glaesserella parasuis, IAV	1	0.02
PCV2, PCV3, Glaesserella parasuis, IAV, Mesomycoplasma hyopneumoniae, Mesomycoplasma hyorhinis	1	0.02
PCV2, PCV3, Glaesserella parasuis, IAV, Mesomycoplasma hyopneumoniae, Mesomycoplasma hyorhinis, PRRSV-1, Streptococcus suis	1	0.02
PCV2, PCV3, Glaesserella parasuis, IAV, Mesomycoplasma hyopneumoniae, Mesomycoplasma hyorhinis, Pasteurella multocida, Streptococcus suis	1	0.02
PCV2, PCV3, Glaesserella parasuis, IAV, Mesomycoplasma hyopneumoniae, Mesomycoplasma hyorhinis, Streptococcus suis	1	0.02
PCV2, PCV3, Glaesserella parasuis, IAV, Mesomycoplasma hyopneumoniae, Pasteurella multocida, PRRSV-1, Streptococcus suis	1	0.02
PCV2, PCV3, Glaesserella parasuis, IAV, Mesomycoplasma hyopneumoniae, Streptococcus suis	1	0.02
PCV2, PCV3, Glaesserella parasuis, IAV, Mesomycoplasma hyorhinis, Pasteurella multocida, PRRSV-1	1	0.02
PCV2, PCV3, Glaesserella parasuis, IAV, Mesomycoplasma hyorhinis, Streptococcus suis	1	0.02
PCV2, PCV3, Glaesserella parasuis, IAV, Pasteurella multocida, PRRSV-1	1	0.02
PCV2, PCV3, Glaesserella parasuis, IAV, Pasteurella multocida, PRRSV-1, Streptococcus suis	1	0.02
PCV2, PCV3, Glaesserella parasuis, IAV, Pasteurella multocida, Streptococcus suis	1	0.02
PCV2, PCV3, Glaesserella parasuis, IAV, Streptococcus suis	1	0.02
PCV2, PCV3, Glaesserella parasuis, Mesomycoplasma hyopneumoniae, Mesomycoplasma hyorhinis, Pasteurella multocida, PRRSV-1	1	0.02
PCV2, PCV3, Glaesserella parasuis, Mesomycoplasma hyopneumoniae, PRRSV-1	1	0.02
PCV2, PCV3, Glaesserella parasuis, Mesomycoplasma hyorhinis, Pasteurella multocida	1	0.02
PCV2, PCV3, IAV	1	0.02
PCV2, PCV3, IAV, Mesomycoplasma hyopneumoniae	1	0.02
PCV2, PCV3, IAV, Mesomycoplasma hyopneumoniae, Mesomycoplasma hyorhinis	1	0.02
PCV2, PCV3, IAV, Mesomycoplasma hyopneumoniae, PRRSV-1	1	0.02
PCV2, PCV3, IAV, Mesomycoplasma hyopneumoniae, PRRSV-1, Streptococcus suis	1	0.02
PCV2, PCV3, IAV, Mesomycoplasma hyopneumoniae, Pasteurella multocida	1	0.02
PCV2, PCV3, IAV, Mesomycoplasma hyopneumoniae, Pasteurella multocida, Streptococcus suis	1	0.02
PCV2, PCV3, IAV, Mesomycoplasma hyorhinis	1	0.02
PCV2, PCV3, IAV, PRRSV-1, Streptococcus suis	1	0.02
PCV2, PCV3, Mesomycoplasma hyopneumoniae, Mesomycoplasma hyorhinis	1	0.02
PCV2, PCV3, Mesomycoplasma hyopneumoniae, Mesomycoplasma hyorhinis, PRRSV-1	1	0.02
PCV2, PCV3, Mesomycoplasma hyopneumoniae, Mesomycoplasma hyorhinis, Pasteurella multocida, Streptococcus suis	1	0.02
PCV2, PCV3, Mesomycoplasma hyopneumoniae, PRRSV-1	1	0.02
PCV2, PCV3, Mesomycoplasma hyopneumoniae, PRRSV-1, Streptococcus suis	1	0.02
PCV2, PCV3, Mesomycoplasma hyopneumoniae, Pasteurella multocida	1	0.02
PCV2, PCV3, Mesomycoplasma hyopneumoniae, Pasteurella multocida, PRRSV-1	1	0.02
PCV2, PCV3, Mesomycoplasma hyopneumoniae, Pasteurella multocida, PRRSV-1, Streptococcus suis	1	0.02
PCV2, PCV3, Mesomycoplasma hyorhinis, PRRSV-1, Streptococcus suis	1	0.02
PCV2, PCV3, Mesomycoplasma hyorhinis, Pasteurella multocida, PRRSV-1	1	0.02
PCV2, PCV3, Mesomycoplasma hyorhinis, Pasteurella multocida, PRRSV-1, Streptococcus suis	1	0.02
PCV2, PCV3, Mesomycoplasma hyorhinis, Pasteurella multocida, Streptococcus suis	1	0.02
PCV2, PCV3, Mesomycoplasma hyorhinis, Streptococcus suis	1	0.02
PCV2, PCV3, Pasteurella multocida, PRRSV-1	1	0.02
PCV2, Glaesserella parasuis, IAV	1	0.02
PCV2, Glaesserella parasuis, IAV, Mesomycoplasma hyopneumoniae	1	0.02
PCV2, Glaesserella parasuis, IAV, Mesomycoplasma hyopneumoniae, Mesomycoplasma hyorhinis	1	0.02
PCV2, Glaesserella parasuis, IAV, Mesomycoplasma hyopneumoniae, Mesomycoplasma hyorhinis, Streptococcus suis	1	0.02
PCV2, Glaesserella parasuis, IAV, Mesomycoplasma hyopneumoniae, PRRSV-1	1	0.02
PCV2, Glaesserella parasuis, IAV, Mesomycoplasma hyopneumoniae, PRRSV-1, Streptococcus suis	1	0.02
PCV2, Glaesserella parasuis, IAV, Mesomycoplasma hyopneumoniae, Pasteurella multocida, Streptococcus suis	1	0.02
PCV2, Glaesserella parasuis, IAV, Mesomycoplasma hyopneumoniae, Streptococcus suis	1	0.02
PCV2, Glaesserella parasuis, IAV, Mesomycoplasma hyorhinis, Pasteurella multocida	1	0.02
PCV2, Glaesserella parasuis, IAV, PRRSV-1	1	0.02
PCV2, Glaesserella parasuis, IAV, PRRSV-1, Streptococcus suis	1	0.02
PCV2, Glaesserella parasuis, IAV, Pasteurella multocida, Streptococcus suis	1	0.02
PCV2, Glaesserella parasuis, Mesomycoplasma hyorhinis, Pasteurella multocida	1	0.02
PCV2, IAV, Mesomycoplasma hyopneumoniae, Mesomycoplasma hyorhinis, PRRSV-1	1	0.02
PCV2, IAV, Mesomycoplasma hyopneumoniae, Mesomycoplasma hyorhinis, Pasteurella multocida, PRRSV-1	1	0.02
PCV2, IAV, Mesomycoplasma hyopneumoniae, Mesomycoplasma hyorhinis, Pasteurella multocida, Streptococcus suis	1	0.02
PCV2, IAV, Mesomycoplasma hyopneumoniae, PRRSV-1, Streptococcus suis	1	0.02
PCV2, IAV, Mesomycoplasma hyopneumoniae, Pasteurella multocida	1	0.02
PCV2, IAV, Pasteurella multocida, Streptococcus suis	1	0.02
PCV3, Glaesserella parasuis, IAV, Mesomycoplasma hyopneumoniae, Mesomycoplasma hyorhinis, PRRSV-1	1	0.02
PCV3, Glaesserella parasuis, IAV, Mesomycoplasma hyopneumoniae, Mesomycoplasma hyorhinis, Pasteurella multocida, PRRSV-1, Streptococcus suis	1	0.02
PCV3, Glaesserella parasuis, IAV, Mesomycoplasma hyopneumoniae, PRRSV-1, Streptococcus suis	1	0.02
PCV3, Glaesserella parasuis, IAV, Mesomycoplasma hyorhinis, Pasteurella multocida, PRRSV-1	1	0.02
PCV3, Glaesserella parasuis, Mesomycoplasma hyopneumoniae	1	0.02
PCV3, Glaesserella parasuis, Mesomycoplasma hyopneumoniae, Mesomycoplasma hyorhinis	1	0.02
PCV3, Glaesserella parasuis, Mesomycoplasma hyopneumoniae, Mesomycoplasma hyorhinis, PRRSV-1	1	0.02
PCV3, Glaesserella parasuis, Mesomycoplasma hyopneumoniae, Mesomycoplasma hyorhinis, PRRSV-2, Streptococcus suis	1	0.02
PCV3, Glaesserella parasuis, Mesomycoplasma hyopneumoniae, Mesomycoplasma hyorhinis, Pasteurella multocida, PRRSV-1	1	0.02
PCV3, Glaesserella parasuis, Mesomycoplasma hyopneumoniae, Mesomycoplasma hyorhinis, Pasteurella multocida, Streptococcus suis	1	0.02
PCV3, Glaesserella parasuis, Mesomycoplasma hyopneumoniae, PRRSV-1	1	0.02
PCV3, Glaesserella parasuis, Mesomycoplasma hyopneumoniae, Pasteurella multocida, PRRSV-1, Streptococcus suis	1	0.02
PCV3, Glaesserella parasuis, Mesomycoplasma hyopneumoniae, Streptococcus suis	1	0.02
PCV3, Glaesserella parasuis, Mesomycoplasma hyorhinis, Pasteurella multocida, PRRSV-1	1	0.02
PCV3, IAV, Mesomycoplasma hyopneumoniae, Mesomycoplasma hyorhinis, PRRSV-1, Streptococcus suis	1	0.02
PCV3, IAV, Mesomycoplasma hyopneumoniae, Mesomycoplasma hyorhinis, Pasteurella multocida	1	0.02
PCV3, IAV, Mesomycoplasma hyopneumoniae, Pasteurella multocida, PRRSV-1	1	0.02
PCV3, IAV, Mesomycoplasma hyopneumoniae, Streptococcus suis	1	0.02
PCV3, IAV, Mesomycoplasma hyorhinis	1	0.02
PCV3, IAV, Mesomycoplasma hyorhinis, PRRSV-1	1	0.02
PCV3, IAV, Pasteurella multocida, Streptococcus suis	1	0.02
PCV3, Mesomycoplasma hyopneumoniae, Mesomycoplasma hyorhinis, PRRSV-1, Streptococcus suis	1	0.02
PCV3, Mesomycoplasma hyopneumoniae, Mesomycoplasma hyorhinis, Pasteurella multocida	1	0.02
PCV3, Mesomycoplasma hyopneumoniae, Mesomycoplasma hyorhinis, Pasteurella multocida, PRRSV-1, Streptococcus suis	1	0.02
PCV3, Mesomycoplasma hyopneumoniae, Mesomycoplasma hyorhinis, Streptococcus suis	1	0.02
PCV3, Mesomycoplasma hyopneumoniae, Pasteurella multocida, PRRSV-1	1	0.02
PCV3, Mesomycoplasma hyopneumoniae, Streptococcus suis	1	0.02
PCV3, Mesomycoplasma hyorhinis, Pasteurella multocida, Streptococcus suis	1	0.02
PCV3, Mesomycoplasma hyorhinis, Streptococcus suis	1	0.02
PCV3, Pasteurella multocida, PRRSV-1	1	0.02
Glaesserella parasuis, IAV, Mesomycoplasma hyopneumoniae, Mesomycoplasma hyorhinis	1	0.02
Glaesserella parasuis, IAV, Mesomycoplasma hyopneumoniae, Mesomycoplasma hyorhinis, Pasteurella multocida, PRRSV-1	1	0.02
Glaesserella parasuis, IAV, Mesomycoplasma hyopneumoniae, PRRSV-1, Streptococcus suis	1	0.02
Glaesserella parasuis, IAV, Mesomycoplasma hyopneumoniae, Streptococcus suis	1	0.02
Glaesserella parasuis, IAV, Pasteurella multocida, PRRSV-1	1	0.02
Glaesserella parasuis, IAV, Pasteurella multocida, Streptococcus suis	1	0.02
IAV, Mesomycoplasma hyopneumoniae, Mesomycoplasma hyorhinis	1	0.02
IAV, Mesomycoplasma hyopneumoniae, Mesomycoplasma hyorhinis, Pasteurella multocida	1	0.02
IAV, Mesomycoplasma hyopneumoniae, Mesomycoplasma hyorhinis, Pasteurella multocida, PRRSV-1	1	0.02
IAV, Mesomycoplasma hyopneumoniae, Mesomycoplasma hyorhinis, Pasteurella multocida, Streptococcus suis	1	0.02
IAV, Mesomycoplasma hyopneumoniae, PRRSV-1, Streptococcus suis	1	0.02
IAV, Mesomycoplasma hyopneumoniae, Pasteurella multocida, PRRSV-1	1	0.02
IAV, Mesomycoplasma hyopneumoniae, Pasteurella multocida, Streptococcus suis	1	0.02
IAV, Mesomycoplasma hyorhinis, Pasteurella multocida	1	0.02
IAV, Mesomycoplasma hyorhinis, Pasteurella multocida, PRRSV-1	1	0.02
IAV, Mesomycoplasma hyorhinis, Pasteurella multocida, PRRSV-1, Streptococcus suis	1	0.02
IAV, PRRSV-1, Streptococcus suis	1	0.02
Mesomycoplasma hyopneumoniae, Mesomycoplasma hyorhinis, Pasteurella multocida	1	0.02
PRRSV-2	1	0.02
