# Supplementary material for: Unraveling the Complex Dynamics of Porcine Respiratory Disease Complex (PRDC) Pathogens in the Spanish Swine Production
Source: Research Square preprint supplement (doi:10.21203/rs.3.rs-7179782/v1), 2025-09-03
Supplement: Supplementary file 5 [file ac66a4bce27064e0839668d4.xlsx]

## Sheet: Table_S5
Tables S5. Generalized linear model for Actinobacillus pleuropneumoniae.
Term	OR	95% CI-low	95% CI-high	P-value	Significance
(Intercept)	0.261724	0.232059	0.29518	9.6307e-106	***
Pasteurella multocida	1.60422	1.41906	1.81355	4.24676e-14	***
Glaesserella parasuis	1.50393	1.31777	1.71638	1.42116e-09	***
Streptococcus suis	1.26793	1.11866	1.43711	0.000203479	***
PRRSV-1	1.22802	1.09287	1.37988	0.000554458	***
Actinobacillus suis	1.37341	1.11336	1.6942	0.00305049	**
IAV	0.604768	0.506771	0.721714	2.4648e-08	***
PCV2	1.13269	1.00908	1.27144	0.034578	*
Mesomycoplasma hyorhinis	0.788499	0.694028	0.895831	0.000262803	***

## Sheet: Table_S6
Tables S6. Generalized linear model for Actinobacillus suis.
Term	OR	95% CI-low	95% CI-high	P-value	Significance
(Intercept)	0.0243849	0.0189604	0.0313613	5.0531e-184	***
Pasteurella multocida	1.9972	1.60947	2.47833	3.35094e-10	***
Streptococcus suis	2.03519	1.57422	2.63116	5.8669e-08	***
Glaesserella parasuis	1.55027	1.19729	2.00732	0.000881225	***
Actinobacillus pleuropneumoniae	1.35176	1.09645	1.66652	0.00476985	**
Bordetella bronchiseptica	1.24122	0.960538	1.60392	0.0984992	.
IAV	1.33485	1.01944	1.74784	0.0357275	*
Mesomycoplasma hyorhinis	0.760153	0.605398	0.954467	0.018213	*

## Sheet: Table_S7
Tables S7. Generalized linear model for Bordetella bronchiseptica.
Term	OR	95% CI-low	95% CI-high	P-value	Significance
(Intercept)	0.0465349	0.0385326	0.0561992	8.9065e-223	***
Mesomycoplasma hyorhinis	2.79257	2.34863	3.32044	3.0371e-31	***
Glaesserella parasuis	1.7669	1.47037	2.12324	1.2556e-09	***
Streptococcus suis	1.50735	1.27292	1.78496	1.95595e-06	***
PRRSV-1	1.136	0.97574	1.32259	0.100287
Actinobacillus suis	1.23974	0.95983	1.60127	0.0997692	.
PCV3	1.22614	1.01951	1.47465	0.030372	*

## Sheet: Table_S8
Tables S8. Generalized linear model for PCV2.
Term	OR	95% CI-low	95% CI-high	P-value	Significance
(Intercept)	0.382804	0.348561	0.420412	1.03117e-89	***
Mesomycoplasma hyopneumoniae	1.67886	1.47932	1.90531	1.0101e-15	***
PRRSV-1	1.47617	1.32633	1.64294	9.93467e-13	***
PCV3	1.20889	1.04897	1.39319	0.00878369	**
Actinobacillus pleuropneumoniae	1.14571	1.02228	1.28404	0.0193404	*

## Sheet: Table_S9
Tables S9. Generalized linear model for Glaesserella parasuis.
Term	OR	95% CI-low	95% CI-high	P-value	Significance
(Intercept)	0.213717	0.189039	0.241618	3.79408e-134	***
Mesomycoplasma hyorhinis	4.05418	3.56653	4.6085	1.13493e-101	***
Streptococcus suis	2.99397	2.64703	3.38638	3.36383e-68	***
Pasteurella multocida	2.12079	1.84313	2.44027	8.56761e-26	***
Bordetella bronchiseptica	1.74665	1.44799	2.1069	5.57071e-09	***
PRRSV-1	1.25337	1.10788	1.41795	0.000333922	***
IAV	2.03682	1.67716	2.4736	7.14381e-13	***
Actinobacillus pleuropneumoniae	1.50004	1.31277	1.71402	2.52447e-09	***
Actinobacillus suis	1.59401	1.22403	2.07582	0.000539736	***
Mesomycoplasma hyopneumoniae	0.750473	0.644096	0.87442	0.000232582	***

## Sheet: Table_S10
Tables S10. Generalized linear model for IAV.
Term	OR	95% CI-low	95% CI-high	P-value	Significance
(Intercept)	0.0700257	0.0592827	0.0827155	6.10347e-215	***
Mesomycoplasma hyorhinis	1.77413	1.49586	2.10416	4.50575e-11	***
Glaesserella parasuis	1.99566	1.66008	2.39907	1.89299e-13	***
Mesomycoplasma hyopneumoniae	1.36292	1.14578	1.6212	0.000470467	***
Actinobacillus pleuropneumoniae	0.600696	0.50395	0.716014	1.28242e-08	***
PCV3	1.41499	1.17201	1.70835	0.000304825	***
Actinobacillus suis	1.36573	1.04492	1.78502	0.0225072	*

## Sheet: Table_S11
Tables S11. Generalized linear model for Mesomycoplasma hyopneumoniae.
Term	OR	95% CI-low	95% CI-high	P-value	Significance
(Intercept)	0.118942	0.10343	0.136781	6.1447e-196	***
Pasteurella multocida	2.43508	2.1228	2.79329	5.19779e-37	***
Streptococcus suis	1.42301	1.22881	1.6479	2.44703e-06	***
PCV2	1.63813	1.43919	1.86457	7.93261e-14	***
Mesomycoplasma hyorhinis	1.27816	1.10686	1.47598	0.000829219	***
IAV	1.39887	1.17079	1.67139	0.000218772	***
Glaesserella parasuis	0.765589	0.656817	0.892374	0.00063443	***
PCV3	1.14736	0.970937	1.35583	0.106581

## Sheet: Table_S12
Tables S12. Generalized linear model for Mesomycoplasma hyorhinis.
Term	OR	95% CI-low	95% CI-high	P-value	Significance
(Intercept)	0.127404	0.111322	0.145809	8.44373e-197	***
Glaesserella parasuis	4.04056	3.55588	4.5913	8.90704e-102	***
Streptococcus suis	1.5668	1.37932	1.77977	4.99605e-12	***
PRRSV-1	2.55116	2.26451	2.87409	1.61269e-53	***
Pasteurella multocida	1.70352	1.49141	1.94581	4.1075e-15	***
Bordetella bronchiseptica	2.90253	2.43417	3.461	1.7297e-32	***
IAV	1.92794	1.61094	2.30732	7.91465e-13	***
Mesomycoplasma hyopneumoniae	1.38481	1.19469	1.60519	1.55318e-05	***
Actinobacillus suis	0.814906	0.645177	1.02929	0.085842	.
Actinobacillus pleuropneumoniae	0.790554	0.694194	0.90029	0.000394293	***

## Sheet: Table_S13
Tables S13. Generalized linear model for PRRSV-1.
Term	OR	95% CI-low	95% CI-high	P-value	Significance
(Intercept)	0.456763	0.411254	0.507308	1.71977e-48	***
Mesomycoplasma hyorhinis	2.50424	2.22989	2.81235	3.14999e-54	***
Glaesserella parasuis	1.26207	1.11795	1.42478	0.000168452	***
Streptococcus suis	1.21394	1.08226	1.36164	0.000934687	***
PCV2	1.46987	1.31613	1.64158	8.3054e-12	***
Actinobacillus pleuropneumoniae	1.24137	1.10605	1.39324	0.000240885	***

## Sheet: Table_S14
Tables S14. Generalized linear model for Pasteurella multocida.
Term	OR	95% CI-low	95% CI-high	P-value	Significance
(Intercept)	0.0889119	0.0769014	0.102798	2.49728e-234	***
Streptococcus suis	2.23532	1.95985	2.54951	4.12354e-33	***
Glaesserella parasuis	2.12176	1.8475	2.43672	1.6999e-26	***
Mesomycoplasma hyorhinis	1.72684	1.52014	1.96164	4.51531e-17	***
Mesomycoplasma hyopneumoniae	2.47952	2.15979	2.84658	4.98684e-38	***
Actinobacillus pleuropneumoniae	1.63607	1.44492	1.85251	8.08506e-15	***
Actinobacillus suis	2.01313	1.61639	2.50724	4.15927e-10	***
PCV2	1.09581	0.969527	1.23854	0.143026
PCV3	1.12127	0.958887	1.31116	0.15156

[truncated: 2 more sheets: Table_S15, Table_S16]
